# Supplementary material for: Asymmetric dearomatization of 2-nitrobenzofurans by organocatalyzed one-step Michael addition to access 3,3′-disubstituted oxindoles
Source: Royal Society of Chemistry journal article supplement (doi:10.1039/c9cc09939e), 2020-01-01
Supplement: c9cc09939e1.pdf [file c9cc09939e1.pdf]

# Asymmetric dearomatization of 2-nitrobenzofurans by organocatalyzed one-step Michael addition to access 3,3'-disubstituted oxindoles

Zhen-Zhen Ge,<sup>a,d,§</sup> Lei Yang,<sup>a,d,§</sup> Yong You,<sup>b</sup> Zhen-Hua Wang,<sup>b</sup> Ke-Xin Xie,<sup>c</sup> Ming-Qiang Zhou,<sup>a</sup>  
Jian-Qiang Zhao,<sup>b,\*</sup> and Wei-Cheng Yuan<sup>a,b,\*</sup>

<sup>a</sup>National Engineering Research Center of Chiral Drugs, Chengdu Institute of Organic Chemistry, Chinese Academy of Sciences, Chengdu, 610041, China.

<sup>b</sup>Institute for Advanced Study, Chengdu University, Chengdu 610106, China.

<sup>c</sup>Chengdu Institute of Biology, Chinese Academy of Sciences, Chengdu 610041, China

<sup>d</sup>University of Chinese Academy of Sciences, Beijing, 100049, China

yuanwc@cioc.ac.cn

zhaojianqiang@cdu.edu.cn

## Supporting Information

### Table of Contents

|                                                                                                            |     |
|------------------------------------------------------------------------------------------------------------|-----|
| 1. General experimental information .....                                                                  | S1  |
| 2. General experimental procedures for synthesis of 2-nitrobenzofurans.....                                | S1  |
| 3. General experimental procedures for synthesis of 3-pyrrolyl-oxindoles.....                              | S1  |
| 4. General experimental procedures for asymmetric synthesis of compounds <b>3</b> .....                    | S1  |
| 5. General experimental procedures for asymmetric synthesis of compounds <b>5</b> .....                    | S7  |
| 6. Scale-up experiment .....                                                                               | S9  |
| 7. X-Ray crystal data for compounds <b>3d</b> .....                                                        | S9  |
| 8. Proposed activation mode for the reaction of 3-monosubstituted oxindoles and<br>2-nitrobenzofurans..... | S11 |
| 9. General experimental procedures for in vitro cytotoxicity assay .....                                   | S11 |
| 10. <sup>1</sup> H, <sup>13</sup> C NMR, and HPLC spectra for compounds <b>3</b> and <b>5</b> .....        | S13 |

## 1. General experimental information

Reagents were purchased from commercial sources and were used as received unless mentioned otherwise. Reactions were monitored by TLC. <sup>1</sup>H NMR and <sup>13</sup>C NMR spectra were recorded in CDCl<sub>3</sub>. <sup>1</sup>H NMR chemical shifts are reported in ppm relative to tetramethylsilane (TMS) with the solvent resonance employed as the internal standard (CDCl<sub>3</sub> at 7.26 ppm). Data are reported as follows: chemical shift, multiplicity (s = singlet, br s = broad singlet, d = doublet, t = triplet, q = quartet, m = multiplet), coupling constants (Hz) and integration. <sup>13</sup>C NMR chemical shifts are reported in ppm from tetramethylsilane (TMS) with the solvent resonance as the internal standard (CDCl<sub>3</sub> at 77.20 ppm). Melting points were recorded on a melting point apparatus.

## 2. General experimental procedures for synthesis of 2-nitrobenzofurans. 2-Nitrobenzofurans **1** were synthesized following known procedure.<sup>1,2</sup>

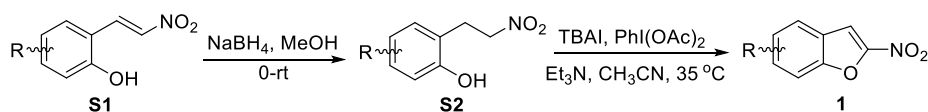

A solution of **S1** (1.0 equiv) in MeOH (0.1 M) was slowly added NaBH<sub>4</sub> (2.0 equiv) at 0 °C. Then the reaction was warmed to room temperature for completion (monitored by TLC). After quenched with water, the mixture was concentrated by rotary evaporation to remove MeOH, extracted with EtOAc. The organic layer was washed with brine, dried over Na<sub>2</sub>SO<sub>4</sub>, filtered and concentrated by rotary evaporation to afford the crude **S2**. To a 100 mL flask were added crude **S2**, Bu<sub>4</sub>NI (2.5 equiv), NEt<sub>3</sub> (2.0 equiv), PhI(OAc)<sub>2</sub> (3.0 equiv) and acetonitrile (0.1 M). The mixture was stirred at 35 °C for 1-2 h. Upon completion as shown by TLC, the reaction mixture was washed with saturated Na<sub>2</sub>S<sub>2</sub>O<sub>3</sub> and extracted using EtOAc. The organic layer was dried over MgSO<sub>4</sub> and concentrated in vacuo. The residue was purified by silica gel column chromatography (PE/EtOAc = 20/1) to afford the desired product **1**.

## 3. General experimental procedures for synthesis of 3-pyrrolyl-oxindoles. Compounds **2** were synthesized following known procedure.<sup>3</sup>

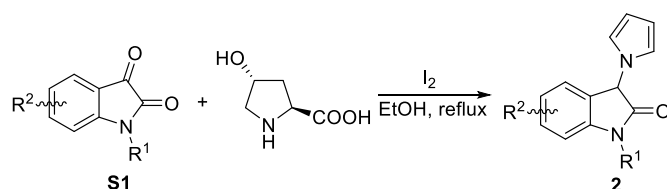

To isatin **S1** (10 mmol), hydroxyproline (10 mmol), and iodine (200 mg) was added ethanol (20 mL) and the mixture was heated under reflux for 1 h. Then the mixture was diluted with water (6 mL), extracted with CH<sub>2</sub>Cl<sub>2</sub> (2×50mL), and the extract was washed with Na<sub>2</sub>S<sub>2</sub>O<sub>3</sub> solution (10%, 50 mL), saturated Na<sub>2</sub>CO<sub>3</sub> (50 mL), and dried (Na<sub>2</sub>SO<sub>4</sub>). Pure product **2** was isolated by silica gel column chromatography eluting with ethyl acetate/hexane (30/70).

### Reference:

- (1) S.-C. Lu, P.-R. Zheng and G. Liu, *J. Org. Chem.*, **2012**, *77*, 7711.
- (2) Q. Cheng, H.-J. Zhang, W.-J. Yue and S.-L. You, *Chem.*, 2017, **3**, 428.
- (3) B.-D. Cui, Y. You, J. -Q. Zhao, J. Zuo, Z. -J. Wu, X. -Y. Xu, X. -M. Zhang and W. -C. Yuan, *Chem. Commun.*, 2015, **51**, 757.

## 4. General experimental procedures for asymmetric synthesis of compounds **3**

To a solution of catalyst **D** (7.1 mg, 0.01 mmol, 10 mol %) and 2-nitrobenzofurans **1** (0.12 mmol) in xylene (1.0 mL) was added 3-pyrrolyl-oxindoles **2** (0.1 mmol) at -20 °C. Then the

mixture was stirred continuously for specific time at -20 °C. After completion, the reaction mixture was directly purified by flash chromatography on silica gel (petroleum ether/ethyl acetate = 3:1~6:1) to give the corresponding products **3**.

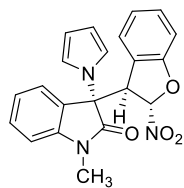

**(S)-1-methyl-3-((2S,3R)-2-nitro-2,3-dihydrobenzofuran-3-yl)-3-(1H-pyrrol-1-yl)indolin-2-one (3a)**. Light yellow solid; 37.4 mg, 99% yield; >20:1 dr, 96% ee;  $[\alpha]_{\text{D}}^{20} = -52.7$  (*c* 1.83, CH<sub>2</sub>Cl<sub>2</sub>); m.p. 172.8-173.9 °C. The ee was determined by HPLC analysis using a Chiralpak IA-H column (90/10 hexane/*i*PrOH; flow rate: 1.0 mL/min;  $\lambda = 254$  nm;  $t_{\text{major}} = 21.34$  min,  $t_{\text{minor}} = 14.15$  min); <sup>1</sup>H NMR (300 MHz, CDCl<sub>3</sub>)  $\delta$  3.23 (s, 3H), 4.86-4.95 (m, 1H), 5.48 (d, *J* = 1.9 Hz, 1H), 5.91-6.05 (m, 1H), 6.27 (t, *J* = 2.3 Hz, 2H), 6.32-6.44 (m, 1H), 6.85-6.96 (m, 2H), 6.95-7.02 (m, 2H), 7.04 (t, *J* = 2.2 Hz, 2H), 7.28-7.37 (m, 1H), 7.40-7.48 (m, 1H); <sup>13</sup>C NMR (75 MHz, CDCl<sub>3</sub>)  $\delta$  26.7, 56.0, 66.1, 106.2, 109.3, 109.6, 110.3, 119.4, 120.4, 122.6, 123.2, 123.4, 125.6, 126.0, 130.8, 131.4, 144.0, 159.1, 171.8; HRMS (ESI-TOF) Calcd. for C<sub>21</sub>H<sub>17</sub>N<sub>3</sub>NaO<sub>4</sub> [M+Na]<sup>+</sup>: 398.1111; found: 398.1100.

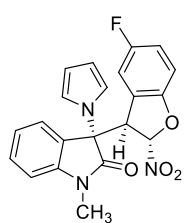

**(S)-3-((2S,3R)-5-fluoro-2-nitro-2,3-dihydrobenzofuran-3-yl)-1-methyl-3-(1H-pyrrol-1-yl)indolin-2-one (3b)**. Light yellow solid; 36.1 mg, 92% yield; >20:1 dr, 95% ee;  $[\alpha]_{\text{D}}^{20} = -100.9$  (*c* 1.63, CH<sub>2</sub>Cl<sub>2</sub>); m.p. 93.5-94.7 °C. The ee was determined by HPLC analysis using a Chiralpak IA-H column (90/10 hexane/*i*PrOH; flow rate: 1.0 mL/min;  $\lambda = 254$  nm;  $t_{\text{major}} = 26.61$  min,  $t_{\text{minor}} = 15.61$  min); <sup>1</sup>H NMR (300 MHz, CDCl<sub>3</sub>)  $\delta$  3.25 (s, 3H), 4.83-4.94 (m, 1H), 5.46 (d, *J* = 1.9 Hz, 1H), 5.58-5.69 (m, 1H), 6.29 (t, *J* = 2.2 Hz, 2H), 6.42-6.55 (m, 1H), 6.91-6.99 (m, 2H), 6.99-7.07 (m, 4H), 7.42-7.50 (m, 1H); <sup>13</sup>C NMR (75 MHz, CDCl<sub>3</sub>)  $\delta$  26.7, 56.2 (*J* = 2.1 Hz), 65.8, 106.6, 109.4, 109.9, 110.8 (*J* = 8.5 Hz), 113.0 (*J* = 26.3 Hz), 117.4 (*J* = 24.6 Hz), 119.3, 122.0, 122.2, 123.3, 125.9, 131.6, 144.0, 156.2 (*J* = 168.6 Hz), 160.4, 171.6; HRMS (ESI-TOF) Calcd. for C<sub>21</sub>H<sub>16</sub>FN<sub>3</sub>NaO<sub>4</sub> [M+Na]<sup>+</sup>: 416.1017; found: 416.1023.

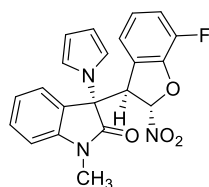

**(S)-3-((2S,3R)-7-fluoro-2-nitro-2,3-dihydrobenzofuran-3-yl)-1-methyl-3-(1H-pyrrol-1-yl)indolin-2-one (3c)**. Light yellow solid; 35.7 mg, 91% yield; >20:1 dr, 88% ee;  $[\alpha]_{\text{D}}^{20} = -68.6$  (*c* 1.45, CH<sub>2</sub>Cl<sub>2</sub>); m.p. 176.3-177.5 °C. The ee was determined by HPLC analysis using a Chiralpak IC-H column (90/10 hexane/EtOH; flow rate: 1.0 mL/min;  $\lambda = 254$  nm;  $t_{\text{major}} = 11.20$  min,  $t_{\text{minor}} = 12.71$  min); <sup>1</sup>H NMR (300 MHz, CDCl<sub>3</sub>)  $\delta$  3.26 (s, 3H), 4.95 (d, *J* = 2.1 Hz, 1H), 5.51 (d, *J* = 2.1 Hz, 1H), 5.76 (dd, 1H), 6.27 (t, *J* = 2.2 Hz, 2H), 6.35-6.45 (m, 1H), 6.78-6.92 (m, 1H), 6.96 (d, *J* = 7.9 Hz, 1H), 6.99-7.08 (m, 3H), 7.08-7.18 (m, 1H), 7.46 (td, *J* = 7.8, 1.2 Hz, 1H); <sup>13</sup>C NMR (75 MHz, CDCl<sub>3</sub>)  $\delta$  26.7, 56.4 (*J* = 7.5 Hz), 65.9, 106.4, 109.5, 109.8, 118.1 (*J* = 16.1 Hz), 119.4, 120.9 (*J* = 4.0 Hz), 122.1, 123.5, 124.0, 124.3 (*J* = 5.4 Hz), 125.8, 131.6, 144.0, 145.7 (*J* = 11.3 Hz), 146.8 (*J* = 258.3 Hz), 171.6; HRMS (ESI-TOF) Calcd. for C<sub>21</sub>H<sub>16</sub>FN<sub>3</sub>NaO<sub>4</sub> [M+Na]<sup>+</sup>: 416.1017; found: 416.1018.

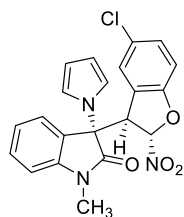

**(S)-3-((2S,3R)-5-chloro-2-nitro-2,3-dihydrobenzofuran-3-yl)-1-methyl-3-(1H-pyrrol-1-yl)indolin-2-one (3d)**. Light yellow solid; 40.5 mg, 99% yield; >20:1 dr, 95% ee;  $[\alpha]_{\text{D}}^{20} = -136.4$  (*c* 1.73, CH<sub>2</sub>Cl<sub>2</sub>); m.p. 163.1-164.3 °C. The ee was determined by HPLC analysis using a Chiralpak IA-H column (90/10 hexane/*i*PrOH; flow rate: 1.0 mL/min;  $\lambda = 254$  nm;  $t_{\text{major}} = 20.60$  min,  $t_{\text{minor}} = 15.51$  min); <sup>1</sup>H NMR (300 MHz, CDCl<sub>3</sub>)  $\delta$  3.25 (s, 3H), 4.88 (d, *J* = 1.9 Hz, 1H), 5.48 (d, *J* = 1.9 Hz, 1H), 5.83 (d, *J* = 2.3 Hz, 1H), 6.30 (t, *J* = 2.2 Hz, 2H), 6.46-6.58 (m, 1H), 6.95 (t, *J* = 7.9 Hz, 2H), 7.00-7.08 (m, 3H), 7.30 (dd, *J* = 8.6, 2.3 Hz, 1H), 7.42-7.53 (m, 1H);

$^{13}\text{C}$  NMR (75 MHz,  $\text{CDCl}_3$ )  $\delta$  26.7, 56.2, 65.9, 106.4, 109.4, 110.0, 111.3, 119.4, 122.3, 122.5, 123.4, 125.9, 128.6, 130.8, 131.6, 144.0, 157.6, 171.6; HRMS (ESI-TOF) Calcd. for  $\text{C}_{21}\text{H}_{16}^{35}\text{ClN}_3\text{NaO}_4$   $[\text{M}+\text{Na}]^+$ : 432.0722; found:432.0726; Calcd. for  $\text{C}_{21}\text{H}_{16}^{37}\text{ClN}_3\text{NaO}_4$   $[\text{M}+\text{Na}]^+$ : 434.0692; found:434.0707.

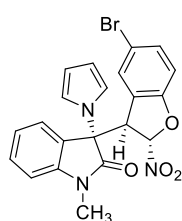

**(S)-3-((2S,3R)-5-bromo-2-nitro-2,3-dihydrobenzofuran-3-yl)-1-methyl-3-(1H-pyrrol-1-yl)indolin-2-one (3e).** Light yellow solid; 43.2 mg, 95% yield; >20:1 dr, 96% ee;  $[\alpha]_{\text{D}}^{20} = -118.1$  (*c* 1.75,  $\text{CH}_2\text{Cl}_2$ ); m.p. 101.4-102.6 °C. The ee was determined by HPLC analysis using a Chiralpak IA-H column (90/10 hexane/*i*PrOH; flow rate: 1.0 mL/min;  $\lambda = 254$  nm;  $t_{\text{major}} = 20.03$  min,  $t_{\text{minor}} = 16.10$  min);  $^1\text{H}$  NMR (300 MHz,  $\text{CDCl}_3$ )  $\delta$  3.24 (s, 3H), 4.88 (d, *J* = 2.7 Hz, 1H), 5.48 (d, *J* = 1.9 Hz, 1H), 5.87-5.98 (m, 1H), 6.30 (t, *J* = 2.3 Hz, 2H), 6.44-6.57 (m, 1H), 6.89 (d, *J* = 8.6 Hz, 1H), 6.94-6.99 (m, 1H), 7.00-7.09 (m, 3H), 7.36-7.55 (m, 2H);  $^{13}\text{C}$  NMR (75 MHz,  $\text{CDCl}_3$ )  $\delta$  26.7, 56.2, 65.9, 106.3, 109.4, 110.0, 111.8, 115.7, 119.4, 122.3, 122.9, 123.4, 125.9, 128.8, 131.6, 133.6, 144.0, 158.2, 171.5; HRMS (ESI-TOF) Calcd. for  $\text{C}_{21}\text{H}_{16}^{79}\text{BrN}_3\text{NaO}_4$   $[\text{M}+\text{Na}]^+$ : 476.0216; found: 476.0222; Calcd. for  $\text{C}_{21}\text{H}_{16}^{81}\text{BrN}_3\text{NaO}_4$   $[\text{M}+\text{Na}]^+$ : 478.0196; found: 478.0195.

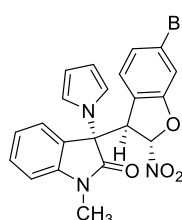

**(S)-3-((2S,3R)-6-bromo-2-nitro-2,3-dihydrobenzofuran-3-yl)-1-methyl-3-(1H-pyrrol-1-yl)indolin-2-one (3f).** Light yellow solid; 45.0 mg, 99% yield; >20:1 dr, 95% ee;  $[\alpha]_{\text{D}}^{20} = -104.2$  (*c* 2.15,  $\text{CH}_2\text{Cl}_2$ ); m.p. 108.1-109.4 °C. The ee was determined by HPLC analysis using a Chiralpak IA-H column (95/5 hexane/*i*PrOH; flow rate: 1.0 mL/min;  $\lambda = 254$  nm;  $t_{\text{major}} = 22.34$  min,  $t_{\text{minor}} = 19.84$  min);  $^1\text{H}$  NMR (300 MHz,  $\text{CDCl}_3$ )  $\delta$  3.25 (s, 3H), 4.84 (d, *J* = 2.0 Hz, 1H), 5.46 (d, *J* = 2.0 Hz, 1H), 5.73-5.83 (m, 1H), 6.26 (t, *J* = 2.2 Hz, 2H), 6.42-6.56 (m, 1H), 6.95 (d, *J* = 7.9 Hz, 1H), 7.00-7.08 (m, 4H), 7.18 (d, *J* = 1.7 Hz, 1H), 7.39-7.58 (m, 1H);  $^{13}\text{C}$  NMR (75 MHz,  $\text{CDCl}_3$ )  $\delta$  26.7, 55.8, 65.8, 106.3, 109.4, 109.8, 114.1, 119.4, 119.9, 122.3, 123.4, 124.1, 125.9, 126.6, 126.7, 131.5, 144.0, 159.7, 171.6; HRMS (ESI-TOF) Calcd. for  $\text{C}_{21}\text{H}_{16}^{79}\text{BrN}_3\text{NaO}_4$   $[\text{M}+\text{Na}]^+$ : 476.0216; found: 476.0221; Calcd. for  $\text{C}_{21}\text{H}_{16}^{81}\text{BrN}_3\text{NaO}_4$   $[\text{M}+\text{Na}]^+$ : 478.0196; found: 478.0190.

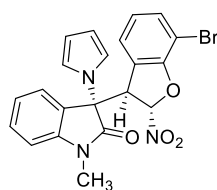

**(S)-3-((2S,3R)-7-bromo-2-nitro-2,3-dihydrobenzofuran-3-yl)-1-methyl-3-(1H-pyrrol-1-yl)indolin-2-one (3g).** Light yellow solid; 41.3 mg, 91% yield; >20:1 dr, 87% ee;  $[\alpha]_{\text{D}}^{20} = -14.0$  (*c* 1.40,  $\text{CH}_2\text{Cl}_2$ ); m.p. 208.3-209.7 °C. The ee was determined by HPLC analysis using a Chiralpak IA-H column (90/10 hexane/*i*PrOH; flow rate: 1.0 mL/min;  $\lambda = 254$  nm;  $t_{\text{major}} = 17.72$  min,  $t_{\text{minor}} = 15.86$  min);  $^1\text{H}$  NMR (300 MHz,  $\text{CDCl}_3$ )  $\delta$  3.26 (s, 3H), 4.98 (d, *J* = 2.2 Hz, 1H), 5.45 (d, *J* = 2.0 Hz, 1H), 5.90 (dt, *J* = 7.5, 1.0 Hz, 1H), 6.26 (t, *J* = 2.2 Hz, 2H), 6.29-6.36 (m, 1H), 6.80 (t, *J* = 7.8 Hz, 1H), 6.92-7.06 (m, 4H), 7.39-7.57 (m, 2H);  $^{13}\text{C}$  NMR (75 MHz,  $\text{CDCl}_3$ )  $\delta$  26.8, 56.9, 65.9, 102.9, 105.4, 109.5, 109.8, 119.4, 121.9, 122.1, 123.4, 124.6, 124.8, 126.0, 131.7, 133.9, 144.0, 156.5, 171.6; HRMS (ESI-TOF) Calcd. for  $\text{C}_{21}\text{H}_{16}^{79}\text{BrN}_3\text{NaO}_4$   $[\text{M}+\text{Na}]^+$ : 476.0216; found: 476.0231; Calcd. for  $\text{C}_{21}\text{H}_{16}^{81}\text{BrN}_3\text{NaO}_4$   $[\text{M}+\text{Na}]^+$ : 478.0196; found: 478.0195.

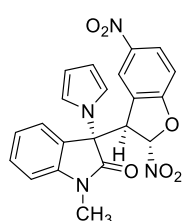

**(S)-3-((2S,3R)-2,5-dinitro-2,3-dihydrobenzofuran-3-yl)-1-methyl-3-(1H-pyrrol-1-yl)indolin-2-one (3h).** Light yellow solid; 41.5 mg, 99% yield; >20:1 dr, 90% ee;  $[\alpha]_{\text{D}}^{20} = -130.9$  (*c* 1.83,  $\text{CH}_2\text{Cl}_2$ ); m.p. 212.1-213.4 °C. The ee was determined by HPLC analysis using a Chiralpak IA-H column (90/10 hexane/*i*PrOH; flow rate: 1.0 mL/min;  $\lambda = 254$  nm;  $t_{\text{major}} = 34.71$  min,  $t_{\text{minor}} =$

27.81 min); <sup>1</sup>H NMR (300 MHz, CDCl<sub>3</sub>) δ 3.24 (s, 3H), 4.94 (d, *J* = 2.0 Hz, 1H), 5.67 (d, *J* = 2.1 Hz, 1H), 6.34 (t, *J* = 2.2 Hz, 2H), 6.52-6.64 (m, 1H), 6.66-6.71 (m, 1H), 6.98 (d, *J* = 7.9 Hz, 1H), 7.03-7.17 (m, 4H), 7.42-7.54 (m, 1H), 8.29 (dd, *J* = 8.9, 2.4 Hz, 1H); <sup>13</sup>C NMR (75 MHz, CDCl<sub>3</sub>) δ 26.8, 55.6, 65.7, 106.5, 109.7, 110.5, 110.6, 119.3, 122.1, 122.3, 122.4, 123.6, 125.5, 127.7, 131.9, 143.9, 144.1, 163.2, 171.2; HRMS (ESI-TOF) Calcd. for C<sub>21</sub>H<sub>16</sub>BrN<sub>4</sub>NaO<sub>6</sub> [M+Na]<sup>+</sup>: 443.0962; found: 443.0966.

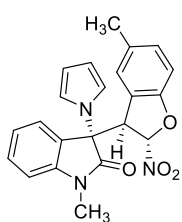

**(S)-1-methyl-3-((2S,3R)-5-methyl-2-nitro-2,3-dihydrobenzofuran-3-yl)-3-(1H-pyrrol-1-yl)indolin-2-one (3i).** Light yellow solid; 38.5 mg, 99% yield; >20:1 dr, 96% ee; [α]<sub>D</sub><sup>20</sup> = -106.5 (*c* 1.55, CH<sub>2</sub>Cl<sub>2</sub>); m.p. 171.5-172.7 °C.

The ee was determined by HPLC analysis using a Chiralpak IA-H column (90/10 hexane/<sup>i</sup>PrOH; flow rate: 1.0 mL/min; λ = 254 nm; *t*<sub>major</sub> = 17.26 min, *t*<sub>minor</sub> = 13.95 min); <sup>1</sup>H NMR (300 MHz, CDCl<sub>3</sub>) δ 2.15 (s, 3H), 3.24 (s, 3H),

4.86 (d, *J* = 2.5 Hz, 1H), 5.42 (d, *J* = 1.8 Hz, 1H), 5.65-5.78 (m, 1H), 6.27 (t, *J* = 2.3 Hz, 2H), 6.34-6.45 (m, 1H), 6.88 (d, *J* = 8.2 Hz, 1H), 6.91-6.96 (m, 1H), 6.96-7.02 (m, 1H), 7.04 (t, *J* = 2.3 Hz, 2H), 7.08-7.15 (m, 1H), 7.37-7.51 (m, 1H); <sup>13</sup>C NMR (75 MHz, CDCl<sub>3</sub>) δ 20.7, 26.7, 56.2, 66.1, 106.4, 109.2, 109.5, 109.7, 119.4, 120.3, 122.5, 123.2, 126.1, 126.2, 131.1, 131.3, 133.0, 144.0, 157.1, 171.9; HRMS (ESI-TOF) Calcd. for C<sub>22</sub>H<sub>19</sub>N<sub>3</sub>NaO<sub>4</sub> [M+Na]<sup>+</sup>: 412.1268; found: 412.1270.

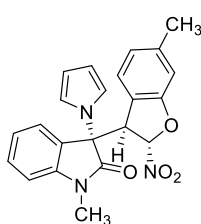

**(S)-1-methyl-3-((2S,3R)-6-methyl-2-nitro-2,3-dihydrobenzofuran-3-yl)-3-(1H-pyrrol-1-yl)indolin-2-one (3j).** Light yellow solid; 38.6 mg, 99% yield; >20:1 dr, 96% ee; [α]<sub>D</sub><sup>20</sup> = -73.1 (*c* 1.64, CH<sub>2</sub>Cl<sub>2</sub>); m.p. 175.1-176.4 °C.

The ee was determined by HPLC analysis using a Chiralpak IA-H column (95/5 hexane/<sup>i</sup>PrOH; flow rate: 1.0 mL/min; λ = 254 nm; *t*<sub>major</sub> = 24.04 min, *t*<sub>minor</sub> = 17.87 min); <sup>1</sup>H NMR (300 MHz, CDCl<sub>3</sub>) δ 2.36 (s, 3H), 3.24 (s, 3H),

4.81-4.91 (m, 1H), 5.45 (d, *J* = 1.9 Hz, 1H), 5.86 (d, *J* = 7.7 Hz, 1H), 6.26 (t, *J* = 2.2 Hz, 2H), 6.40-6.47 (m, 1H), 6.66-6.74 (m, 1H), 6.82 (d, *J* = 1.4 Hz, 1H), 6.94 (d, *J* = 7.9 Hz, 1H), 6.96-7.05 (m, 3H), 7.39-7.48 (m, 1H); <sup>13</sup>C NMR (75 MHz, CDCl<sub>3</sub>) δ 21.6, 26.7, 55.9, 66.1, 106.4, 109.2, 109.5, 110.9, 117.3, 119.4, 122.6, 123.2, 124.3, 125.1, 126.1, 131.3, 141.5, 144.0, 159.3, 171.9; HRMS (ESI-TOF) Calcd. for C<sub>22</sub>H<sub>19</sub>N<sub>3</sub>NaO<sub>4</sub> [M+Na]<sup>+</sup>: 412.1268; found: 412.1263.

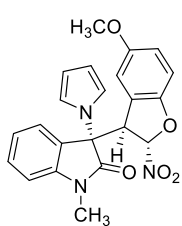

**(S)-3-((2S,3R)-5-methoxy-2-nitro-2,3-dihydrobenzofuran-3-yl)-1-methyl-3-(1H-pyrrol-1-yl)indolin-2-one (3k).** Light yellow solid; 39.2 mg, 97% yield; >20:1 dr, 93% ee; [α]<sub>D</sub><sup>20</sup> = -105.9 (*c* 1.56, CH<sub>2</sub>Cl<sub>2</sub>); m.p. 185.3-186.6 °C.

The ee was determined by HPLC analysis using a Chiralpak IA-H column (90/10 hexane/<sup>i</sup>PrOH; flow rate: 1.0 mL/min; λ = 254 nm; *t*<sub>major</sub> = 25.48 min, *t*<sub>minor</sub> = 17.49 min); <sup>1</sup>H NMR (300 MHz, CDCl<sub>3</sub>) δ 3.27 (s, 3H), 3.54 (s, 3H),

4.87 (d, *J* = 1.8 Hz, 1H), 5.37 (d, *J* = 1.8 Hz, 1H), 5.46 (d, *J* = 2.5 Hz, 1H), 6.27 (t, *J* = 2.2 Hz, 2H), 6.34-6.40 (m, 1H), 6.82-6.93 (m, 2H), 6.93-7.01 (m, 2H), 7.05 (t, *J* = 2.2 Hz, 2H), 7.40-7.49 (m, 1H); <sup>13</sup>C NMR (75 MHz, CDCl<sub>3</sub>) δ 26.7, 55.6, 56.5, 65.9, 106.6, 109.3, 109.5, 109.6, 117.3, 119.2, 119.5, 121.1, 122.1, 123.2, 126.3, 131.4, 144.0, 152.9, 155.9, 171.9; HRMS (ESI-TOF) Calcd. for C<sub>22</sub>H<sub>19</sub>N<sub>3</sub>NaO<sub>5</sub> [M+Na]<sup>+</sup>: 428.1217; found: 428.1216.

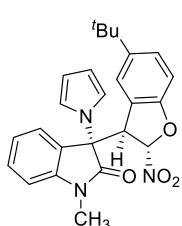

**(S)-3-((2S,3R)-5-(tert-butyl)-2-nitro-2,3-dihydrobenzofuran-3-yl)-1-methyl-3-(1H-pyrrol-1-yl)indolin-2-one (3l).** Light yellow solid; 42.6 mg, 99% yield; >20:1 dr, 95% ee; [α]<sub>D</sub><sup>20</sup> = -85.1 (*c* 1.65, CH<sub>2</sub>Cl<sub>2</sub>); m.p. 198.0-199.1 °C.

The ee was determined by HPLC analysis using a Chiralpak IA-H column

(90/10 hexane/<sup>i</sup>PrOH; flow rate: 1.0 mL/min;  $\lambda = 254$  nm;  $t_{\text{major}} = 11.82$  min,  $t_{\text{minor}} = 9.18$  min); <sup>1</sup>H NMR (300 MHz, CDCl<sub>3</sub>)  $\delta$  1.13 (s, 9H), 3.21 (s, 3H), 4.87 (d,  $J = 2.5$  Hz, 1H), 5.50 (d,  $J = 1.8$  Hz, 1H), 5.94 (d,  $J = 2.1$  Hz, 1H), 6.28 (t,  $J = 2.2$  Hz, 2H), 6.39 (d,  $J = 7.5$  Hz, 1H), 6.85-6.96 (m, 2H), 6.97-7.09 (m, 3H), 7.30-7.36 (m, 1H), 7.39-7.47 (m, 1H); <sup>13</sup>C NMR (75 MHz, CDCl<sub>3</sub>)  $\delta$  26.6, 31.3, 34.4, 56.2, 66.2, 106.6, 109.2, 109.3, 109.6, 119.4, 119.9, 122.7, 122.9, 123.3, 126.0, 127.4, 131.2, 143.9, 146.6, 156.8, 171.9; HRMS (ESI-TOF) Calcd. for C<sub>25</sub>H<sub>25</sub>N<sub>3</sub>NaO<sub>4</sub> [M+Na]<sup>+</sup>: 454.1737; found: 454.1739.

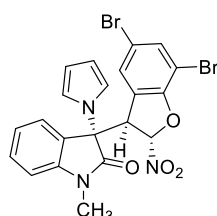

**(S)-3-((2S,3R)-5,7-dibromo-2-nitro-2,3-dihydrobenzofuran-3-yl)-1-methyl-3-(1H-pyrrol-1-yl)indolin-2-one (3m).** Light yellow solid; 49.2 mg, 92% yield; >20:1 dr, 91% ee;  $[\alpha]_{\text{D}}^{20} = -79.2$  (*c* 1.81, CH<sub>2</sub>Cl<sub>2</sub>); m.p. 142.3-143.5 °C. The ee was determined by HPLC analysis using a Chiralpak IA-H column (90/10 hexane/<sup>i</sup>PrOH; flow rate: 1.0 mL/min;  $\lambda = 254$  nm;  $t_{\text{major}} = 19.58$  min,  $t_{\text{minor}} = 15.90$  min); <sup>1</sup>H NMR (300 MHz, CDCl<sub>3</sub>)  $\delta$  3.27 (s, 3H), 4.94 (d,  $J = 2.1$  Hz, 1H), 5.44 (d,  $J = 2.1$  Hz, 1H), 5.79-5.90 (m, 1H), 6.30 (t,  $J = 2.2$  Hz, 2H), 6.38-6.52 (m, 1H), 6.99 (d,  $J = 7.9$  Hz, 1H), 7.01-7.10 (m, 3H), 7.43-7.55 (m, 1H), 7.64 (d,  $J = 1.9$  Hz, 1H); <sup>13</sup>C NMR (75 MHz, CDCl<sub>3</sub>)  $\delta$  26.8, 57.2, 65.7, 103.6, 105.5, 109.6, 110.1, 116.1, 119.3, 121.7, 123.5, 123.8, 125.9, 127.9, 131.9, 136.0, 144.0, 155.9, 171.4; HRMS (ESI-TOF) Calcd. for C<sub>21</sub>H<sub>15</sub><sup>79</sup>Br<sub>2</sub>N<sub>3</sub>NaO<sub>4</sub> [M+Na]<sup>+</sup>: 553.9314; found: 553.9322; Calcd. for C<sub>21</sub>H<sub>15</sub><sup>81</sup>Br<sub>2</sub>N<sub>3</sub>NaO<sub>4</sub> [M+Na]<sup>+</sup>: 557.9281; found: 557.929; Calcd. for C<sub>21</sub>H<sub>15</sub><sup>79</sup>Br<sup>81</sup>BrN<sub>3</sub>NaO<sub>4</sub> [M+Na]<sup>+</sup>: 555.9301; found: 555.9317.

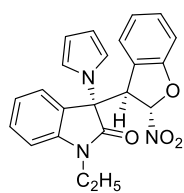

**(S)-1-ethyl-3-((2S,3R)-2-nitro-2,3-dihydrobenzofuran-3-yl)-3-(1H-pyrrol-1-yl)indolin-2-one (3n).** Light yellow solid; 35.8 mg, 92% yield; 17:1 dr, 89% ee;  $[\alpha]_{\text{D}}^{20} = -4.7$  (*c* 1.83, CH<sub>2</sub>Cl<sub>2</sub>); m.p. 157.1-158.4 °C. The ee was determined by HPLC analysis using a Chiralpak IC-H column (95/5 hexane/<sup>i</sup>PrOH; flow rate: 1.0 mL/min;  $\lambda = 254$  nm;  $t_{\text{major}} = 33.69$  min,  $t_{\text{minor}} = 28.42$  min); <sup>1</sup>H NMR (300 MHz, CDCl<sub>3</sub>)  $\delta$  1.08 (t,  $J = 7.1$  Hz, 3H), 3.47-3.67 (m, 1H), 3.79-3.98 (m, 1H), 4.89 (d,  $J = 1.8$  Hz, 1H), 5.67 (d,  $J = 1.8$  Hz, 1H), 5.93 (d,  $J = 7.6$  Hz, 1H), 6.29 (t,  $J = 2.2$  Hz, 2H), 6.61 (d,  $J = 7.6$  Hz, 1H), 6.80-6.89 (m, 1H), 6.92 (d,  $J = 7.9$  Hz, 1H), 6.98-7.10 (m, 4H), 7.25-7.35 (m, 1H), 7.39-7.47 (m, 1H); <sup>13</sup>C NMR (75 MHz, CDCl<sub>3</sub>)  $\delta$  12.2, 35.1, 56.1, 66.1, 106.3, 109.3, 109.7, 110.0, 110.4, 120.3, 123.1, 123.2, 123.6, 125.4, 125.7, 130.7, 131.1, 142.8, 159.0, 171.2; HRMS (ESI-TOF) Calcd. for C<sub>22</sub>H<sub>19</sub>N<sub>3</sub>NaO<sub>4</sub> [M+Na]<sup>+</sup>: 412.1268; found: 412.1263.

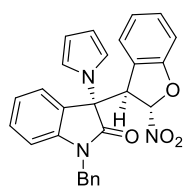

**(S)-1-benzyl-3-((2S,3R)-2-nitro-2,3-dihydrobenzofuran-3-yl)-3-(1H-pyrrol-1-yl)indolin-2-one (3o).** Light yellow solid; 40.1 mg, 89% yield; 13:1 dr, 91% ee;  $[\alpha]_{\text{D}}^{20} = +37.9$  (*c* 1.71, CH<sub>2</sub>Cl<sub>2</sub>); m.p. 170.2-171.3 °C. The ee was determined by HPLC analysis using a Chiralpak IC-H column (95/5 hexane/EtOH; flow rate: 1.0 mL/min;  $\lambda = 254$  nm;  $t_{\text{major}} = 12.55$  min,  $t_{\text{minor}} = 15.85$  min); <sup>1</sup>H NMR (300 MHz, CDCl<sub>3</sub>)  $\delta$  4.58 (d,  $J = 15.4$  Hz, 1H), 4.98 (d,  $J = 1.8$  Hz, 1H), 5.19 (d,  $J = 15.4$  Hz, 1H), 5.62 (d,  $J = 1.8$  Hz, 1H), 6.01 (d,  $J = 7.5$  Hz, 1H), 6.32 (q,  $J = 2.5$  Hz, 2H), 6.54 (d,  $J = 7.5$  Hz, 1H), 6.80-6.91 (m, 2H), 6.94-7.05 (m, 2H), 7.10 (t,  $J = 2.3$  Hz, 2H), 7.16-7.22 (m, 2H), 7.27-7.35 (m, 5H); <sup>13</sup>C NMR (75 MHz, CDCl<sub>3</sub>)  $\delta$  44.4, 56.1, 66.1, 106.1, 109.8, 110.3, 119.4, 119.6, 120.3, 123.3, 123.4, 125.6, 125.7, 127.7, 128.0, 128.8, 129.0, 130.8, 131.1, 134.8, 142.9, 159.1, 171.9; HRMS (ESI-TOF) Calcd. for C<sub>27</sub>H<sub>21</sub>N<sub>3</sub>NaO<sub>4</sub> [M+Na]<sup>+</sup>: 474.1424; found: 474.1426.

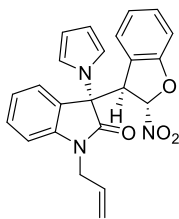

**(S)-1-allyl-3-((2S,3R)-2-nitro-2,3-dihydrobenzofuran-3-yl)-3-(1H-pyrrol-1-yl)indolin-2-one (3p).**

Light yellow solid; 38.8 mg, 97% yield; 10:1 dr, 86% ee;  $[\alpha]_D^{20} = +12.3$  (*c* 1.95, CH<sub>2</sub>Cl<sub>2</sub>); m.p. 161.3-162.4 °C. The ee was determined by HPLC analysis using a Chiralpak IC-H column (95/5 hexane/*i*PrOH; flow rate: 1.0 mL/min;  $\lambda = 254$  nm;  $t_{\text{major}} = 29.01$  min,  $t_{\text{minor}} = 26.33$  min); <sup>1</sup>H NMR (300 MHz, CDCl<sub>3</sub>)  $\delta$  4.13-4.25 (m, 1H), 4.38-4.50 (m, 1H), 4.87-4.96 (m, 1H), 5.08-5.24 (m, 2H), 5.53-5.72 (m, 2H), 5.97 (d, *J* = 7.6 Hz, 1H), 6.29 (q, *J* = 2.1 Hz, 2H), 6.58 (d, *J* = 7.5 Hz, 1H), 6.81-6.95 (m, 2H), 6.97-7.11 (m, 4H), 7.24-7.36 (m, 1H), 7.36-7.48 (m, 1H); <sup>13</sup>C NMR (75 MHz, CDCl<sub>3</sub>)  $\delta$  42.7, 56.0, 66.1, 106.3, 109.8, 110.1, 110.4, 118.7, 119.4, 119.6, 120.3, 123.3, 124.2, 125.5, 125.6, 130.3, 130.8, 131.1, 142.9, 159.1, 171.4; HRMS (ESI-TOF) Calcd. for C<sub>23</sub>H<sub>19</sub>N<sub>3</sub>NaO<sub>4</sub> [M+Na]<sup>+</sup>: 424.1268; found: 424.1264.

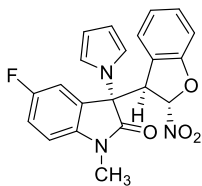

**(S)-5-fluoro-1-methyl-3-((2S,3R)-2-nitro-2,3-dihydrobenzofuran-3-yl)-3-(1H-pyrrol-1-yl)indolin-2-one (3q).**

Light yellow solid; 38.5 mg, 98% yield; >20:1 dr, 93% ee;  $[\alpha]_D^{20} = -45.4$  (*c* 1.56, CH<sub>2</sub>Cl<sub>2</sub>); m.p. 169.3-170.4 °C. The ee was determined by HPLC analysis using a Chiralpak IC-H column (90/10 hexane/*i*PrOH; flow rate: 1.0 mL/min;  $\lambda = 254$  nm;  $t_{\text{major}} = 19.25$  min,  $t_{\text{minor}} = 26.56$  min); <sup>1</sup>H NMR (300 MHz, CDCl<sub>3</sub>)  $\delta$  3.22 (s, 3H), 4.87-4.97 (m, 1H), 5.49 (d, *J* = 1.8 Hz, 1H), 6.01 (d, *J* = 7.5 Hz, 1H), 6.04-6.15 (m, 1H), 6.29 (t, *J* = 2.2 Hz, 2H), 6.84-6.95 (m, 2H), 6.98-7.07 (m, 3H), 7.11-7.22 (m, 1H), 7.30-7.41 (m, 1H); <sup>13</sup>C NMR (75 MHz, CDCl<sub>3</sub>)  $\delta$  26.8, 55.8, 66.3, 105.9, 109.9, 110.0, 110.5, 114.2 (d, *J* = 25.6 Hz), 118.0 (d, *J* = 23.4 Hz), 119.3, 119.9, 123.6, 123.9 (d, *J* = 7.9 Hz), 125.5, 131.1, 139.9, 158.8 (d, *J* = 242.4 Hz), 159.0, 171.6; HRMS (ESI-TOF) Calcd. for C<sub>21</sub>H<sub>16</sub>FN<sub>3</sub>NaO<sub>4</sub> [M+Na]<sup>+</sup>: 416.1017; found: 416.1028.

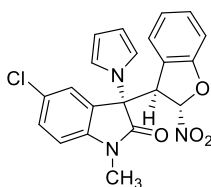

**(S)-5-chloro-1-methyl-3-((2S,3R)-2-nitro-2,3-dihydrobenzofuran-3-yl)-3-(1H-pyrrol-1-yl)indolin-2-one (3r).**

Light yellow solid; 40.5 mg, 99% yield; >20:1 dr, 92% ee;  $[\alpha]_D^{20} = -36.2$  (*c* 1.65, CH<sub>2</sub>Cl<sub>2</sub>); m.p. 194.7-150.8 °C. The ee was determined by HPLC analysis using a Chiralpak IC-H column (90/10 hexane/*i*PrOH; flow rate: 1.0 mL/min;  $\lambda = 254$  nm;  $t_{\text{major}} = 17.07$  min,  $t_{\text{minor}} = 23.58$  min); <sup>1</sup>H NMR (300 MHz, CDCl<sub>3</sub>)  $\delta$  3.20 (s, 3H), 4.91 (d, *J* = 2.3 Hz, 1H), 5.51 (d, *J* = 1.8 Hz, 1H), 5.96-6.06 (m, 1H), 6.24-6.38 (m, 3H), 6.86 (d, *J* = 8.4 Hz, 1H), 6.88-6.95 (m, 1H), 7.00 (t, *J* = 2.3 Hz, 2H), 7.04 (d, *J* = 8.1 Hz, 1H), 7.32-7.39 (m, 1H), 7.39-7.45 (m, 1H); <sup>13</sup>C NMR (75 MHz, CDCl<sub>3</sub>)  $\delta$  26.8, 55.9, 77.4, 105.9, 110.0, 110.2, 110.5, 119.3, 119.9, 123.6, 124.3, 125.5, 126.3, 128.8, 131.1, 131.3, 142.4, 159.0, 171.4; HRMS (ESI-TOF) Calcd. for C<sub>21</sub>H<sub>16</sub><sup>35</sup>ClN<sub>3</sub>NaO<sub>4</sub> [M+Na]<sup>+</sup>: 432.0722; found: 432.0729; Calcd. for C<sub>21</sub>H<sub>16</sub><sup>37</sup>ClN<sub>3</sub>NaO<sub>4</sub> [M+Na]<sup>+</sup>: 434.0692; found: 434.0713.

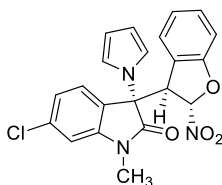

**(S)-6-chloro-1-methyl-3-((2S,3R)-2-nitro-2,3-dihydrobenzofuran-3-yl)-3-(1H-pyrrol-1-yl)indolin-2-one (3s).**

Light yellow solid; 40.2 mg, 98% yield; >20:1 dr, 95% ee;  $[\alpha]_D^{20} = -76.3$  (*c* 1.64, CH<sub>2</sub>Cl<sub>2</sub>); m.p. 157.3-158.9 °C. The ee was determined by HPLC analysis using a Chiralpak IA-H column (90/10 hexane/*i*PrOH; flow rate: 1.0 mL/min;  $\lambda = 254$  nm;  $t_{\text{major}} = 15.34$  min,  $t_{\text{minor}} = 13.44$  min); <sup>1</sup>H NMR (300 MHz, CDCl<sub>3</sub>)  $\delta$  3.22 (s, 3H), 4.90 (d, *J* = 2.5 Hz, 1H), 5.45 (d, *J* = 1.8 Hz, 1H), 5.93-6.07 (m, 1H), 6.24 (d, *J* = 8.7 Hz, 1H), 6.26-6.30 (m, 2H), 6.86-6.94 (m, 1H), 6.94-7.00 (m, 4H), 7.01 (d, *J* = 8.1 Hz, 1H), 7.30-7.39 (m, 1H); <sup>13</sup>C NMR (75 MHz, CDCl<sub>3</sub>)  $\delta$  26.8, 55.9, 65.8, 105.9, 109.9, 110.1, 110.5, 119.3, 120.1, 120.7, 123.2, 123.6, 125.6, 127.0, 131.0, 137.5, 145.2, 159.0, 171.8; HRMS (ESI-TOF) Calcd. for

C<sub>21</sub>H<sub>16</sub><sup>35</sup>ClN<sub>3</sub>NaO<sub>4</sub> [M+Na]<sup>+</sup>: 432.0722; found:432.0724; Calcd. for C<sub>21</sub>H<sub>16</sub><sup>37</sup>ClN<sub>3</sub>NaO<sub>4</sub> [M+Na]<sup>+</sup>: 434.0692; found:434.0708.

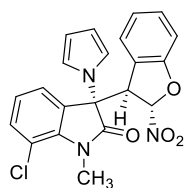

**(S)-7-chloro-1-methyl-3-((2S,3R)-2-nitro-2,3-dihydrobenzofuran-3-yl)-3-(1H-pyrrol-1-yl)indolin-2-one (3t).** Light yellow solid; 39.8 mg, 97% yield; >20:1 dr, 90% ee;  $[\alpha]_D^{20} = -33.3$  (*c* 1.87, CH<sub>2</sub>Cl<sub>2</sub>); m.p. 87.2-88.3 °C. The ee was determined by HPLC analysis using a Chiralpak IA-H column (90/10 hexane/*i*PrOH; flow rate: 1.0 mL/min;  $\lambda = 254$  nm;  $t_{\text{major}} = 14.45$  min,  $t_{\text{minor}} = 11.73$  min); <sup>1</sup>H NMR (300 MHz, CDCl<sub>3</sub>)  $\delta$  3.56 (s, 3H), 4.92 (d, *J* = 2.3 Hz, 1H), 5.60 (d, *J* = 1.8 Hz, 1H), 5.99 (d, *J* = 7.6 Hz, 1H), 6.28 (t, *J* = 2.2 Hz, 2H), 6.33 (d, *J* = 7.6 Hz, 1H), 6.86-6.94 (m, 2H), 6.97-7.04 (m, 3H), 7.30-7.40 (m, 2H); <sup>13</sup>C NMR (75 MHz, CDCl<sub>3</sub>)  $\delta$  30.2, 55.9, 65.7, 106.0, 110.0, 110.5, 116.7, 119.3, 120.0, 123.5, 123.9, 124.3, 125.5, 125.6, 131.0, 133.6, 139.9, 159.0, 172.1; HRMS (ESI-TOF) Calcd. for C<sub>21</sub>H<sub>16</sub><sup>35</sup>ClN<sub>3</sub>NaO<sub>4</sub> [M+Na]<sup>+</sup>: 432.0722; found:432.0738; Calcd. for C<sub>21</sub>H<sub>16</sub><sup>37</sup>ClN<sub>3</sub>NaO<sub>4</sub> [M+Na]<sup>+</sup>: 434.0692; found:434.0722.

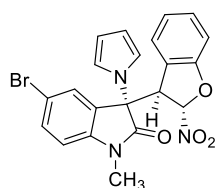

**(S)-5-bromo-1-methyl-3-((2S,3R)-2-nitro-2,3-dihydrobenzofuran-3-yl)-3-(1H-pyrrol-1-yl)indolin-2-one (3u).** Light yellow solid; 43.1 mg, 95% yield; >20:1 dr, 92% ee;  $[\alpha]_D^{20} = -37.3$  (*c* 1.63, CH<sub>2</sub>Cl<sub>2</sub>); m.p. 165.3-166.5 °C. The ee was determined by HPLC analysis using a Chiralpak IC-H column (90/10 hexane/*i*PrOH; flow rate: 1.0 mL/min;  $\lambda = 254$  nm;  $t_{\text{major}} = 17.91$  min,  $t_{\text{minor}} = 24.91$  min); <sup>1</sup>H NMR (300 MHz, CDCl<sub>3</sub>)  $\delta$  3.19 (s, 3H), 4.91 (d, *J* = 1.7 Hz, 1H), 5.52 (d, *J* = 1.7 Hz, 1H), 5.96-6.06 (m, 1H), 6.30 (t, *J* = 2.2 Hz, 2H), 6.43 (d, *J* = 2.0 Hz, 1H), 6.81 (d, *J* = 8.4 Hz, 1H), 6.88-6.95 (m, 1H), 7.00 (t, *J* = 2.2 Hz, 2H), 7.05 (d, *J* = 8.2 Hz, 1H), 7.33-7.41 (m, 1H), 7.55-7.58 (m, 1H); <sup>13</sup>C NMR (75 MHz, CDCl<sub>3</sub>)  $\delta$  26.8, 55.9, 66.3, 105.9, 110.0, 110.5, 110.6, 115.9, 119.3, 119.9, 123.6, 124.6, 125.5, 129.0, 131.1, 134.2, 142.9, 159.0, 171.3; HRMS (ESI-TOF) Calcd. for C<sub>21</sub>H<sub>16</sub><sup>79</sup>BrN<sub>3</sub>NaO<sub>4</sub> [M+Na]<sup>+</sup>: 476.0216; found: 476.0213; Calcd. for C<sub>21</sub>H<sub>16</sub><sup>81</sup>BrN<sub>3</sub>NaO<sub>4</sub> [M+Na]<sup>+</sup>: 478.0196; found: 478.0195.

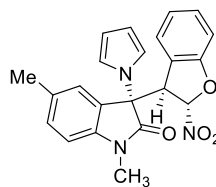

**(S)-1,5-dimethyl-3-((2S,3R)-2-nitro-2,3-dihydrobenzofuran-3-yl)-3-(1H-pyrrol-1-yl)indolin-2-one (3v).** Light yellow solid; 38.1 mg, 98% yield; >20:1 dr, 95% ee;  $[\alpha]_D^{20} = -41.2$  (*c* 1.88, CH<sub>2</sub>Cl<sub>2</sub>); m.p. 96.7-97.9 °C. The ee was determined by HPLC analysis using a Chiralpak IC-H column (90/10 hexane/*i*PrOH; flow rate: 1.0 mL/min;  $\lambda = 254$  nm;  $t_{\text{major}} = 24.18$  min,  $t_{\text{minor}} = 32.61$  min); <sup>1</sup>H NMR (300 MHz, CDCl<sub>3</sub>)  $\delta$  2.19 (s, 3H), 3.19 (s, 3H), 4.90 (d, *J* = 2.3 Hz, 1H), 5.50 (d, *J* = 1.8 Hz, 1H), 5.99 (d, *J* = 7.6 Hz, 1H), 6.14 (s, 1H), 6.27 (t, *J* = 2.2 Hz, 2H), 6.82 (d, *J* = 8.0 Hz, 1H), 6.86-6.94 (m, 1H), 6.97-7.07 (m, 3H), 7.19-7.25 (m, 1H), 7.30-7.37 (m, 1H); <sup>13</sup>C NMR (75 MHz, CDCl<sub>3</sub>)  $\delta$  21.0, 26.6, 56.0, 66.3, 106.1, 108.9, 109.5, 110.1, 119.4, 120.5, 122.5, 123.3, 125.6, 126.6, 130.7, 131.5, 132.9, 141.4, 159.1, 171.7; HRMS (ESI-TOF) Calcd. for C<sub>22</sub>H<sub>19</sub>N<sub>3</sub>NaO<sub>4</sub> [M+Na]<sup>+</sup>: 412.1268; found: 412.1263.

## 5. General experimental procedures for asymmetric synthesis of compounds 5

To a solution of catalyst **D** (7.1 mg, 0.01 mmol, 10 mol %) and 2-nitrobenzofuran **1a** (0.12 mmol) in xylene (1.0 mL) was added 3-monosubstituted oxindoles **4** (0.1 mmol) at -20 °C or rt. Then the mixture was stirred continuously for specific time at -20 °C or rt. After completion, the reaction mixture was directly purified by flash chromatography on silica gel (petroleum ether/ethyl acetate = 3:1~6:1) to give the corresponding products **5**.



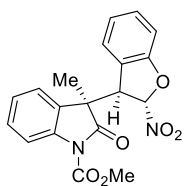

**methyl (R)-3-methyl-3-((2S,3R)-2-nitro-2,3-dihydrobenzofuran-3-yl)-2-oxoindoline-1-carboxylate (5a).** Light yellow solid; 36.4 mg, 99% yield; 13:1 dr, 95% ee;  $[\alpha]_{\text{D}}^{20} = +17.2$  (*c* 1.00,  $\text{CH}_2\text{Cl}_2$ ); m.p. 165.0-166.1 °C. The ee was determined by HPLC analysis using a Chiralpak IC-H column (70/30 hexane/*i*PrOH; flow rate: 1.0 mL/min;  $\lambda = 254$  nm;  $t_{\text{major}} = 8.27$  min,  $t_{\text{minor}} = 9.24$  min);  $^1\text{H NMR}$  (400 MHz,  $\text{CDCl}_3$ )  $\delta$  1.83 (s, 3H), 3.91 (s, 3H), 4.10 (d, *J* = 1.6 Hz), 6.11 (d, *J* = 7.6 Hz, 1H), 6.47 (d, *J* = 1.9 Hz, 1H), 6.68-6.82 (m, 1H), 7.03 (d, *J* = 8.1 Hz, 1H), 7.11-7.16 (m, 1H), 7.21-7.33 (m, 2H), 7.41-7.48 (m, 1H), 7.91 (d, *J* = 8.1 Hz, 1H);  $^{13}\text{C NMR}$  (101 MHz,  $\text{CDCl}_3$ )  $\delta$  22.6, 50.1, 54.1, 57.3, 107.0, 111.0, 115.6, 121.3, 122.8, 122.9, 124.8, 125.4, 129.5, 129.6, 130.6, 139.2, 150.8, 158.4, 176.0; HRMS (ESI-TOF) Calcd. for  $\text{C}_{19}\text{H}_{16}\text{N}_2\text{NaO}_6$   $[\text{M}+\text{Na}]^+$ : 391.0901; found: 391.0900.

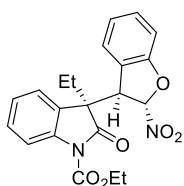

**ethyl (R)-3-ethyl-3-((2S,3R)-2-nitro-2,3-dihydrobenzofuran-3-yl)-2-oxoindoline-1-carboxylate (5b).** Light yellow solid; 37.2 mg, 94% yield; 10:1 dr, 94% ee;  $[\alpha]_{\text{D}}^{20} = +22.6$  (*c* 1.00,  $\text{CH}_2\text{Cl}_2$ ); m.p. 116.9-118.0 °C. The ee was determined by HPLC analysis using a Chiralpak IC-H column (90/10 hexane/*i*PrOH; flow rate: 1.0 mL/min;  $\lambda = 254$  nm;  $t_{\text{major}} = 14.74$  min,  $t_{\text{minor}} = 16.08$  min);  $^1\text{H NMR}$  (400 MHz,  $\text{CDCl}_3$ )  $\delta$  (major diastereomers) 0.76 (t, *J* = 7.4 Hz, 3H), 1.36 (t, *J* = 7.1 Hz, 3H), 2.12-2.28 (m, 1H), 2.43-2.59 (m, 1H), 4.11 (d, *J* = 2.4 Hz, 1H), 4.36 (q, *J* = 7.1 Hz, 2H), 6.09 (d, *J* = 7.6 Hz, 1H), 6.50 (d, *J* = 1.9 Hz, 1H), 6.70-6.78 (m, 1H), 7.02 (d, *J* = 8.1 Hz, 1H), 7.06-7.11 (m, 1H), 7.21-7.26 (m, 1H), 7.27-7.34 (m, 1H), 7.38-7.52 (m, 1H), 7.81-7.93 (m, 1H);  $^{13}\text{C NMR}$  (101 MHz,  $\text{CDCl}_3$ )  $\delta$  (major diastereomers) 8.5, 14.1, 29.3, 55.5, 56.9, 63.6, 107.0, 110.9, 115.4, 121.3, 122.7, 123.0, 124.9, 125.2, 127.5, 129.6, 130.4, 140.4, 150.1, 158.4, 175.5; HRMS (ESI-TOF) Calcd. for  $\text{C}_{21}\text{H}_{20}\text{N}_2\text{NaO}_6$   $[\text{M}+\text{Na}]^+$ : 419.1214; found: 419.1200.

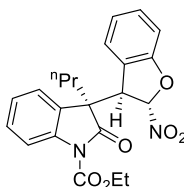

**ethyl (R)-3-((2S,3R)-2-nitro-2,3-dihydrobenzofuran-3-yl)-2-oxo-3-propylindoline-1-carboxylate (5c).** Light yellow solid; 39.0 mg, 95% yield; >20:1 dr, 94% ee;  $[\alpha]_{\text{D}}^{20} = +71.7$  (*c* 1.00,  $\text{CH}_2\text{Cl}_2$ ); m.p. 202.0-203.0 °C. The ee was determined by HPLC analysis using a Chiralpak IC-H column (90/10 hexane/*i*PrOH; flow rate: 1.0 mL/min;  $\lambda = 254$  nm;  $t_{\text{major}} = 10.68$  min,  $t_{\text{minor}} = 13.56$  min);  $^1\text{H NMR}$  (400 MHz,  $\text{CDCl}_3$ )  $\delta$  0.91 (t, *J* = 7.1 Hz, 3H), 0.96-1.05 (m, 1H), 1.09-1.22 (m, 1H), 1.31-1.41 (m, 3H), 2.09-2.21 (m, 1H), 2.33-2.49 (m, 1H), 4.10 (d, *J* = 1.8 Hz, 1H), 4.36 (q, *J* = 7.1 Hz, 2H), 6.06 (d, *J* = 7.6 Hz, 1H), 6.52 (d, *J* = 1.9 Hz, 1H), 6.67-6.79 (m, 1H), 7.02 (d, *J* = 8.1 Hz, 1H), 7.07-7.14 (m, 1H), 7.19-7.26 (m, 1H), 7.27-7.33 (m, 1H), 7.38-7.48 (m, 1H), 7.86 (d, *J* = 8.2 Hz, 1H);  $^{13}\text{C NMR}$  (101 MHz,  $\text{CDCl}_3$ )  $\delta$  14.0, 14.1, 17.6, 38.2, 54.9, 57.0, 63.6, 107.0, 110.9, 115.4, 121.2, 122.6, 123.0, 124.9, 125.2, 127.9, 129.5, 130.4, 140.2, 150.1, 158.4, 175.6; HRMS (ESI-TOF) Calcd. for  $\text{C}_{22}\text{H}_{22}\text{N}_2\text{NaO}_6$   $[\text{M}+\text{Na}]^+$ : 433.1370; found: 433.1377.

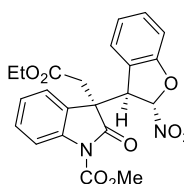

**methyl (R)-3-(2-ethoxy-2-oxoethyl)-3-((2S,3R)-2-nitro-2,3-dihydrobenzofuran-3-yl)-2-oxoindoline-1-carboxylate (5d).** Light yellow solid; 30.8 mg, 70% yield; 16:1 dr, 94% ee;  $[\alpha]_{\text{D}}^{20} = +36.1$  (*c* 1.00,  $\text{CH}_2\text{Cl}_2$ ); m.p. 171.2-172.1 °C. The ee was determined by HPLC analysis using a Chiralpak IC-H column (90/10 hexane/*i*PrOH; flow rate: 1.0 mL/min;  $\lambda = 254$  nm;  $t_{\text{major}} = 15.83$  min,  $t_{\text{minor}} = 10.70$  min);  $^1\text{H NMR}$  (400 MHz,  $\text{CDCl}_3$ )  $\delta$  1.05 (t, *J* = 7.1 Hz, 3H), 3.31 (d, *J* = 16.5 Hz, 1H), 3.56 (d, *J* = 16.5 Hz, 1H), 3.91 (s, 3H), 3.92-3.96 (m, 1H), 3.96-4.02 (m, 1H), 4.12 (d, *J* = 2.3 Hz, 1H), 6.02 (d, *J* = 7.6 Hz, 1H), 6.45 (d, *J* = 1.9 Hz, 1H), 6.69-6.82 (m, 1H), 7.03 (d, *J* = 8.1 Hz, 1H), 7.13 (d, *J* = 7.5 Hz, 1H), 7.23-7.30 (m, 2H), 7.42-7.49 (m, 1H), 7.88-7.97 (m, 1H);

$^{13}\text{C}$  NMR (101 MHz,  $\text{CDCl}_3$ )  $\delta$  13.7, 40.4, 51.4, 54.1, 56.7, 61.4, 106.3, 111.1, 115.6, 120.2, 122.7, 122.9, 125.0, 125.2, 126.9, 130.0, 130.8, 140.7, 150.8, 158.5, 168.5, 174.8; HRMS (ESI-TOF) Calcd. for  $\text{C}_{22}\text{H}_{20}\text{N}_2\text{NaO}_8$   $[\text{M}+\text{Na}]^+$ : 463.1112; found: 463.1109.

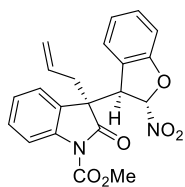

**methyl (R)-3-allyl-3-((2S,3R)-2-nitro-2,3-dihydrobenzofuran-3-yl)-2-oxoindoline-1-carboxylate (5e).** Light yellow solid; 32.3 mg, 84% yield; 3:1 dr, 94% ee;  $[\alpha]_{\text{D}}^{20} = +8.4$  (*c* 1.00,  $\text{CH}_2\text{Cl}_2$ ); m.p. 176.0-177.0 °C. The ee was determined by HPLC analysis using a Chiralpak AD-H column (90/10 hexane/*i*PrOH; flow rate: 1.0 mL/min;  $\lambda = 254$  nm;  $t_{\text{major}} = 23.13$  min,  $t_{\text{minor}} = 63.01$  min);  $^1\text{H}$  NMR (400 MHz,  $\text{CDCl}_3$ )  $\delta$  (major diastereomers) 2.97 (dd,  $J = 13.6, 6.6$  Hz, 1H), 3.12 (dd,  $J = 13.5, 7.9$  Hz, 1H), 3.91 (s, 3H), 5.07-4.97 (m, 1H), 5.18-5.10 (m, 1H), 5.51-5.27 (m, 1H), 6.12 (d,  $J = 7.5$  Hz, 1H), 6.54 (d,  $J = 1.5$  Hz, 1H), 6.75 (t,  $J = 7.5$  Hz, 1H), 7.03 (d,  $J = 8.1$  Hz, 1H), 7.16-7.10 (m, 1H), 7.25-7.20 (m, 1H), 7.34-7.25 (m, 2H), 7.49-7.39 (m, 1H), 7.89 (d,  $J = 8.2$  Hz, 1H);  $^{13}\text{C}$  NMR (101 MHz,  $\text{CDCl}_3$ )  $\delta$  (major diastereomers) 40.4, 54.0, 54.7, 56.3, 106.9, 111.0, 115.5, 121.1, 121.2, 122.8, 123.4, 125.0, 125.2, 127.2, 129.7, 129.8, 130.6, 140.0, 150.7, 158.5, 174.9; HRMS (ESI-TOF) Calcd. for  $\text{C}_{21}\text{H}_{18}\text{N}_2\text{NaO}_6$   $[\text{M}+\text{Na}]^+$ : 417.1057; found: 417.1053.

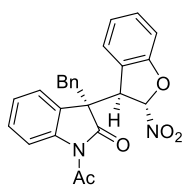

**(R)-1-acetyl-3-benzyl-3-((2S,3R)-2-nitro-2,3-dihydrobenzofuran-3-yl)indoline-2-one (5f).** Light yellow solid; 34.2 mg, 80% yield; 10:1 dr, 71% ee;  $[\alpha]_{\text{D}}^{20} = +41.4$  (*c* 1.00,  $\text{CH}_2\text{Cl}_2$ ); m.p. 186.1-187.0 °C. The ee was determined by HPLC analysis using a Chiralpak IA-H column (85/15 hexane/EtOH; flow rate: 1.0 mL/min;  $\lambda = 254$  nm;  $t_{\text{major}} = 9.96$  min,  $t_{\text{minor}} = 14.07$  min);  $^1\text{H}$  NMR (400 MHz,  $\text{CDCl}_3$ )  $\delta$  (major diastereomers) 2.34 (s, 3H), 3.45 (d,  $J = 13.0$  Hz, 1H), 3.75 (d,  $J = 13.0$  Hz, 1H), 4.35 (d,  $J = 1.9$  Hz, 1H), 6.33 (d,  $J = 7.6$  Hz, 1H), 6.52 (d,  $J = 1.9$  Hz, 1H), 6.77-6.89 (m, 3H), 7.02-7.11 (m, 4H), 7.12-7.18 (m, 1H), 7.28-7.38 (m, 3H), 7.87-8.00 (m, 1H);  $^{13}\text{C}$  NMR (101 MHz,  $\text{CDCl}_3$ )  $\delta$  (major diastereomers) 26.1, 42.4, 56.5, 56.6, 107.1, 110.9, 116.6, 121.3, 123.0, 123.4, 125.3, 125.4, 126.9, 127.4, 128.1, 129.6, 129.7, 130.7, 133.4, 140.7, 158.6, 169.9, 177.4; HRMS (ESI-TOF) Calcd. for  $\text{C}_{25}\text{H}_{20}\text{N}_2\text{NaO}_5$   $[\text{M}+\text{Na}]^+$ : 451.1264; found: 451.1262.

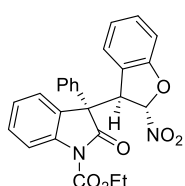

**ethyl 3-((-2-nitro-2,3-dihydrobenzofuran-3-yl)-2-oxo-3-phenylindoline-1-carboxylate (5g).** Light yellow solid; 22.2 mg, 50% yield; >20:1 dr, 0 ee; m.p. 224.0-225.1 °C. The ee was determined by HPLC analysis using a Chiralpak IA-H column (90/10 hexane/*i*PrOH; flow rate: 1.0 mL/min;  $\lambda = 254$  nm;  $t_{\text{major}} = 17.42$  min,  $t_{\text{minor}} = 18.81$  min);  $^1\text{H}$  NMR (400 MHz,  $\text{CDCl}_3$ )  $\delta$  1.43 (t,  $J = 7.1$  Hz, 3H), 4.45 (q,  $J = 7.1$  Hz, 2H), 5.00 (d,  $J = 1.8$  Hz, 1H), 5.78 (d,  $J = 1.7$  Hz, 1H), 6.02 (d,  $J = 7.6$  Hz, 1H), 6.56 (d,  $J = 7.6$  Hz, 1H), 6.71-6.87 (m, 1H), 7.03 (d,  $J = 8.1$  Hz, 1H), 7.09-7.21 (m, 1H), 7.24-7.32 (m, 1H), 7.41-7.49 (m, 4H), 7.52-7.60 (m, 2H), 8.00 (d,  $J = 8.2$  Hz, 1H);  $^{13}\text{C}$  NMR (101 MHz,  $\text{CDCl}_3$ )  $\delta$  14.2, 56.4, 58.7, 63.8, 107.8, 110.8, 115.7, 121.8, 122.8, 125.0, 125.2, 125.3, 126.3, 127.8, 128.7, 129.2, 129.9, 130.7, 135.9, 139.5, 150.4, 159.1, 173.8; HRMS (ESI-TOF) Calcd. for  $\text{C}_{25}\text{H}_{20}\text{N}_2\text{NaO}_6$   $[\text{M}+\text{Na}]^+$ : 467.1214; found: 467.1217.

## 6. Scale-up experiment

To a solution of catalyst **E** (106.5 mg, 5 mol %) and 2-nitrobenzofuran **1a** (0.587 g, 3.6 mmol) in xylene (30.0 mL) was added 3-pyrrolyl-oxindole **2a** (0.636 g, 3.0 mmol) at -20 °C. Then the mixture was stirred continuously for 84 h at -20 °C. After completion, the reaction mixture was directly purified by flash chromatography on silica gel (petroleum ether/ethyl acetate = 3:1) to give the corresponding product **3a** in 99% yield (1.115 g).

## 7. X-Ray crystal data for compounds **3c**

Single crystals of compound **3d** were prepared from the mixture solvent of EtOH and CH<sub>2</sub>Cl<sub>2</sub>. A suitable crystal was selected for structure determination on a Xcalibur, Eos, Gemini diffractometer. The crystal was kept at 293(2) K during data collection. Using Olex2, the structure was solved with the ShelXS structure solution program using Direct Methods and refined with the ShelXLrefinement package using Least Squares minimisation.

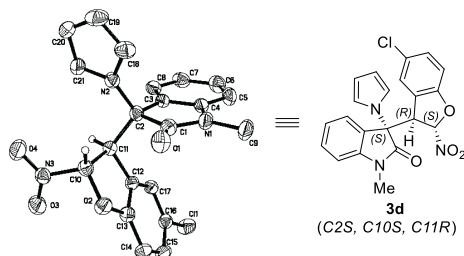

ORTEP of **3d** (at 50% level)

Crystal data and structure refinement for **3d** (1943699)

|                                             |                                                                 |
|---------------------------------------------|-----------------------------------------------------------------|
| Identification code                         | <b>3d</b>                                                       |
| Empirical formula                           | C <sub>21</sub> H <sub>16</sub> ClN <sub>3</sub> O <sub>4</sub> |
| Formula weight                              | 409.82                                                          |
| Temperature/K                               | 293(2)                                                          |
| Crystal system                              | monoclinic                                                      |
| Space group                                 | P2 <sub>1</sub>                                                 |
| a/Å                                         | 9.3140(4)                                                       |
| b/Å                                         | 21.8053(13)                                                     |
| c/Å                                         | 9.5831(5)                                                       |
| α/°                                         | 90                                                              |
| β/°                                         | 94.306(4)                                                       |
| γ/°                                         | 90                                                              |
| Volume/Å <sup>3</sup>                       | 1940.77(17)                                                     |
| Z                                           | 4                                                               |
| ρ <sub>calc</sub> /cm <sup>3</sup>          | 1.403                                                           |
| μ/mm <sup>-1</sup>                          | 2.035                                                           |
| F(000)                                      | 848.0                                                           |
| Crystal size/mm <sup>3</sup>                | 0.15 × 0.13 × 0.1                                               |
| Radiation                                   | CuKα (λ = 1.54184)                                              |
| 2θ range for data collection/°              | 8.11 to 134.14                                                  |
| Index ranges                                | -11 ≤ h ≤ 11, -26 ≤ k ≤ 23, -11 ≤ l ≤ 10                        |
| Reflections collected                       | 18941                                                           |
| Independent reflections                     | 6342 [R <sub>int</sub> = 0.0369, R <sub>sigma</sub> = 0.0402]   |
| Data/restraints/parameters                  | 6342/1/525                                                      |
| Goodness-of-fit on F <sup>2</sup>           | 1.032                                                           |
| Final R indexes [I ≥ 2σ (I)]                | R <sub>1</sub> = 0.0448, wR <sub>2</sub> = 0.1130               |
| Final R indexes [all data]                  | R <sub>1</sub> = 0.0508, wR <sub>2</sub> = 0.1204               |
| Largest diff. peak/hole / e Å <sup>-3</sup> | 0.15/-0.18                                                      |
| Flack parameter                             | -0.011(10)                                                      |

## 8. Proposed activation mode of the chiral catalyst **D** to the reaction between 3-monosubstituted oxindoles and 2-nitrobenzofurans.

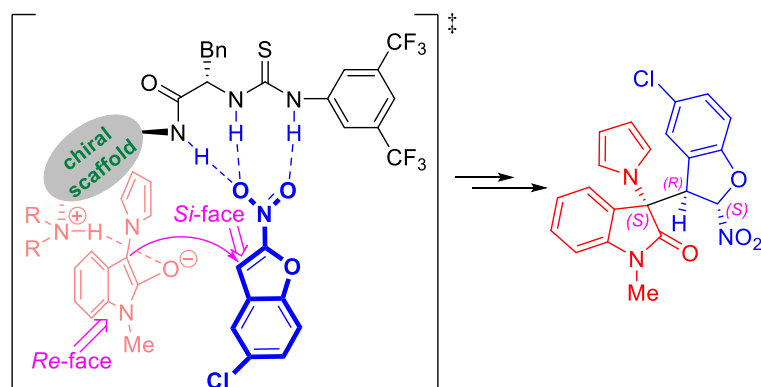

In light of the multiple hydrogen-bonding bifunctional thiourea catalytic model<sup>[ref.1]</sup> and other relevant reports,<sup>[ref.2]</sup> we have proposed a possible activation mode to account for the stereochemistry of the Michael addition process between 3-monosubstituted oxindole and 2-nitrobenzofuran. The substrate 2-nitrobenzofuran is activated and oriented by the multiple hydrogen bonds of thiourea and amide moieties of the catalyst **D**, while the tertiary nitrogen of the cinchonidine would provide suitable basicity to enhance the nucleophilicity of the 3-monosubstituted oxindole. Under this dual-activation model, the C3-position of 3-monosubstituted oxindole from *Re*-face attacks the *Si*-face of C3-position of 2-nitrobenzofuran, which undergoes the Michael addition to provide the 3,3'-disubstituted oxindole product with (*C2S*, *C10S*, *C11R*) configuration.

[ref.1] For selected reviews of bifunctional thiourea catalysis, see: (a) Y. Takemoto, *Org. Biomol. Chem.* 2005, **3**, 4299. (b) A. G. Doyle and E. N. Jacobsen, *Chem. Rev.* 2007, **107**, 5713. (c) X. Yu and W. Wang, *Chem. Asian J.* 2008, **3**, 516. (d) Z. Zhang and P. R. chreiner, *Chem. Soc. Rev.* 2009, **38**, 1187. (e) X. Fang and C.-J. Wang, *Chem. Commun.* 2015, **51**, 1185. For selected examples, see: (f) T. Okino, Y. Hoashi and Y. Takemoto, *J. Am. Chem. Soc.* 2003, **125**, 12672. (g) J. Ye, D. J. Dixon and P. S. Hynes, *Chem. Commun.* 2005, 4481. (h) J. P. Malerich, K. Hagihara and V. H. Rawal, *J. Am. Chem. Soc.* 2008, **130**, 14416. (i) Q. Zhu, and Y. Lu, *Angew. Chem., Int. Ed.* 2010, **49**, 7753. (j) X. Dou, W. Yao, B. Zhou and Y. Lu, *Chem. Commun.* 2013, 49, 9224. (k) D.-F. Yue, J.-Q. Zhao, Y.-Z. Chen, X.-M. Zhang, X.-Y. Xu and W.-C. Yuan, *Adv. Synth. Catal.* 2018, **360**, 1420.

[ref.2] For selected examples, see: (a) Q. Cheng, H.-J. Zhang, W.-J. Yue and S.-L. You, *Chem.*, 2017, **3**, 428; (b) J.-Q. Zhao, X.-J. Zhou, Y. Zhou, X.-Y. Xu, X.-M. Zhang and W.-C. Yuan, *Org. Lett.* 2018, **20**, 909; (c) L. Liang H.-Y. Niu, D.-C. Wang, X.-H. Yang, G.-R. Qu and H.-M. Guo, *Chem. Commun.*, 2019, **55**, 553; (d) J.-Q. Zhao, Y. Yang, X.-J. Zhou, Y. You, Z.-H. Wang, M.-Q. Zhou, X.-M. Zhang, X.-Y. Xu and W.-C. Yuan, *Org. Lett.*, 2019, **21**, 660; (e) X.-J. Zhou, J.-Q. Zhao, X.-M. Chen, J.-R. Zhuo, Y.-P. Zhang, Y.-Z. Chen, X.-M. Zhang, X.-Y. Xu and W.-C. Yuan, *J. Org. Chem.*, 2019, **84**, 4381; (f) X.-H. Yang, J.-P. Li, D.-C. Wang, M.-S. Xie, G.-R. Qu and H.-M. Guo, *Chem. Commun.*, 2019, **55**, 9144.

## 9. General experimental procedures for in vitro cytotoxicity assay

Three human cancer cell lines, human leukemia cells K562, human lung cancer cells A549 and human prostate cancer cells PC-3 were purchased from Chinese Academy of Sciences,

Kunming Cell Bank and Chinese Academy of Sciences, Shanghai Cell Bank respectively. All the cells were cultured in RPMI-1640 medium (GIBICO, USA), supplemented with 10% fetal bovine serum (Hyclone, USA) and Penicillin-Streptomycin (respectively 100 U/mL) in 5% CO<sub>2</sub> at 37 °C. The cytotoxicity assay was performed according to the MTT (3-(4,5-dimethylthiazol-2-yl)-2,5-diphenyl tetrazolium bromide) method in 96-well microplates. Briefly, 5000 cells were seeded into each well of 96-well cell culture plates and allowed to grow for 24 h before the drug is added. Unless K562 tumor cell line was exposed to compounds (**3a**, **3c**, **3e**, **3h**, **3j**, **3k**, **3g**, **3m**, **3r**, **3s**, **3u** and **3v**) at the concentrations of 1, 2, 4, 8 and 20 μmol·L<sup>-1</sup>, each A549 or PC-3 tumor cell line was exposed to the test compounds (**3a**, **3c**, **3e**, **3h**, **3j**, **3k**, **3g**, **3m**, **3r**, **3s**, **3u** and **3v**) at the concentrations of 5, 10, 20, 40 and 80 μmol·L<sup>-1</sup> in triplicates for 48 h, comparable to cisplatin (Aladdin, China). Then the MTT reagent was added to reaction with the cancer cells for 4 hours. At least, measure the OD value at 490 wavelengths. The average 50% inhibitory concentration (IC<sub>50</sub>) of all the compounds is calculated by IBM SPSS Statistics (version 19). Each concentration was analyzed in triplicate at least, and the whole experiment was repeated three times.

**Table 1. Cell Inhibitory Assay of target products in K562, A549, and PC-3 Cells**

| compound                      | IC <sub>50</sub> (μM) <sup>a</sup> |       |       |
|-------------------------------|------------------------------------|-------|-------|
|                               | K562                               | A549  | PC-3  |
| <b>3a</b>                     | 50.39                              | 29.75 | 32.55 |
| <b>3c</b>                     | 13.04                              | 10.14 | 13.44 |
| <b>3e</b>                     | 35.93                              | 52.45 | 19.50 |
| <b>3h</b>                     | 16.99                              | 33.02 | 12.80 |
| <b>3j</b>                     | 10.36                              | 9.04  | 20.93 |
| <b>3k</b>                     | 14.78                              | 12.04 | 17.83 |
| <b>3g</b>                     | 29.58                              | 23.57 | 25.50 |
| <b>3m</b>                     | 18.84                              | 34.67 | 17.96 |
| <b>3r</b>                     | 27.93                              | 29.25 | 8.52  |
| <b>3s</b>                     | 20.58                              | 33.06 | 27.71 |
| <b>3u</b>                     | 20.28                              | 29.61 | 29.49 |
| <b>3v</b>                     | 32.59                              | 32.33 | 9.33  |
| <b>cisplatin</b> <sup>b</sup> | 21.77                              | 17.40 | 20.33 |

<sup>a</sup>IC<sub>50</sub> is the concentration of a compound that affords a 50% reduction in cell growth (after 48 h of incubation), expressed as the mean of triplicate experiments. <sup>b</sup>Commercially available broad-spectrum anticancer drug cisplatin as a positive control.

10.  $^1\text{H}$ ,  $^{13}\text{C}$  NMR, and HPLC spectra for compounds 3 and 5

$^1\text{H}$  and  $^{13}\text{C}$  NMR of 3a

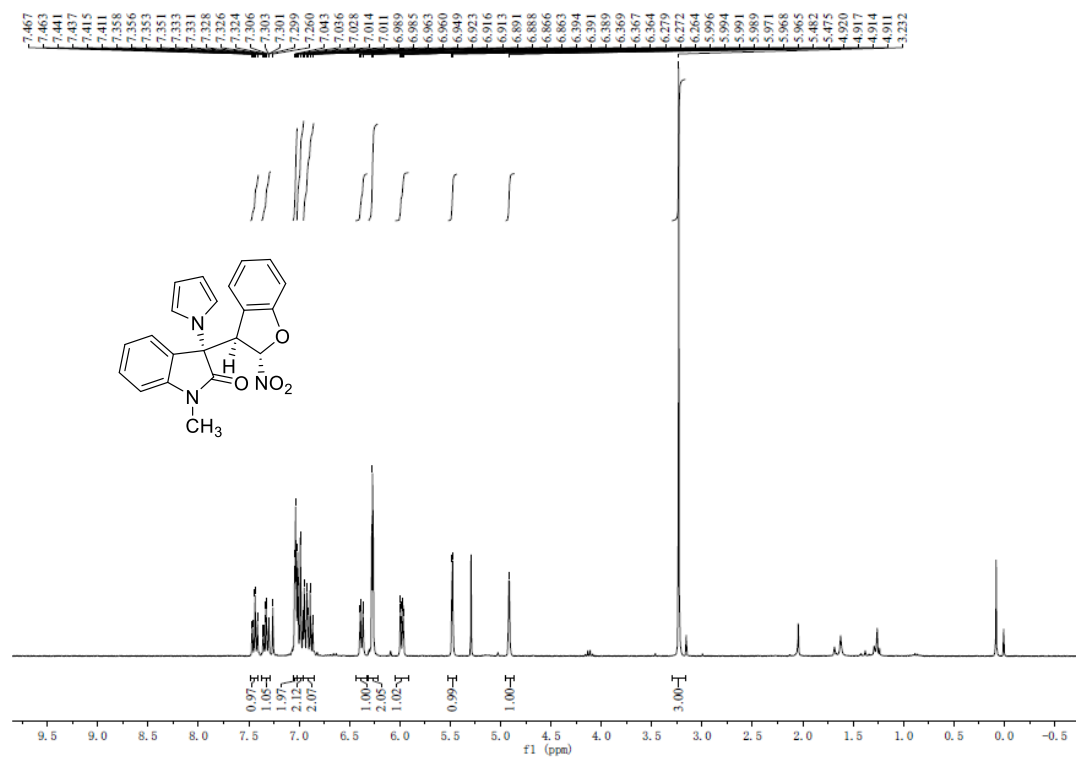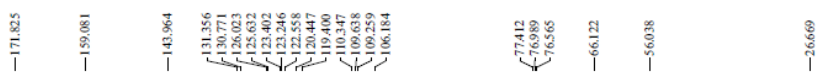

### HPLC of 3a

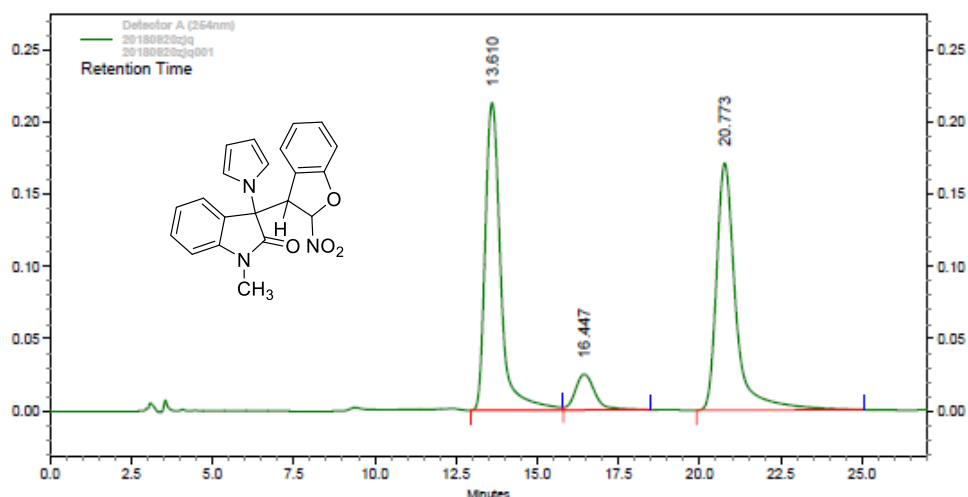

| PK # | Retention Time | Height | Height Percent | Area    | Area Percent |
|------|----------------|--------|----------------|---------|--------------|
| 1    | 13.610         | 213164 | 52.09          | 7063146 | 46.55        |
| 2    | 16.447         | 24758  | 6.05           | 1045456 | 6.89         |
| 3    | 20.773         | 171291 | 41.86          | 7064170 | 46.56        |

| Totals | Height | Height Percent | Area     | Area Percent |
|--------|--------|----------------|----------|--------------|
|        | 409213 | 100.00         | 15172772 | 100.00       |

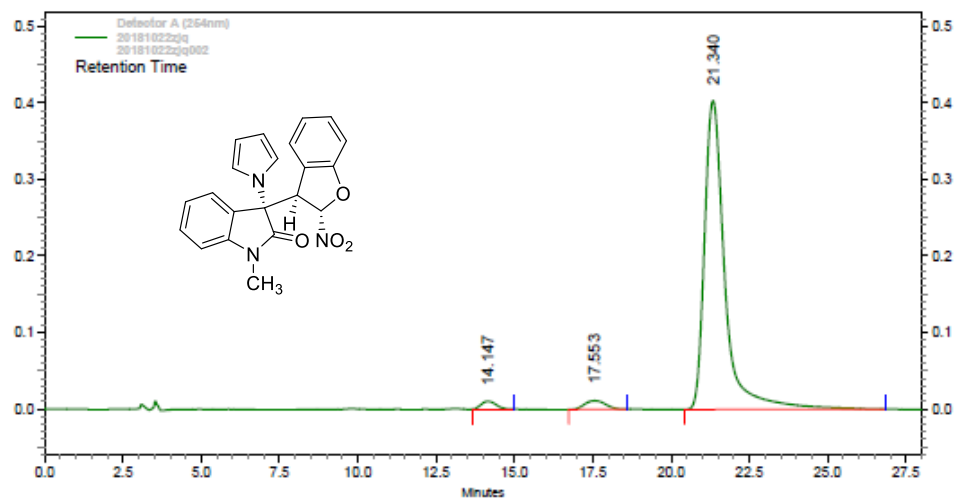

| PK # | Retention Time | Height | Height Percent | Area     | Area Percent |
|------|----------------|--------|----------------|----------|--------------|
| 1    | 14.147         | 10187  | 2.40           | 344081   | 1.79         |
| 2    | 17.553         | 11310  | 2.66           | 527515   | 2.75         |
| 3    | 21.340         | 403767 | 94.95          | 18334981 | 95.46        |

| Totals | Height | Height Percent | Area     | Area Percent |
|--------|--------|----------------|----------|--------------|
|        | 425264 | 100.00         | 19206577 | 100.00       |

# $^1\text{H}$ and $^{13}\text{C}$ NMR of **3b**

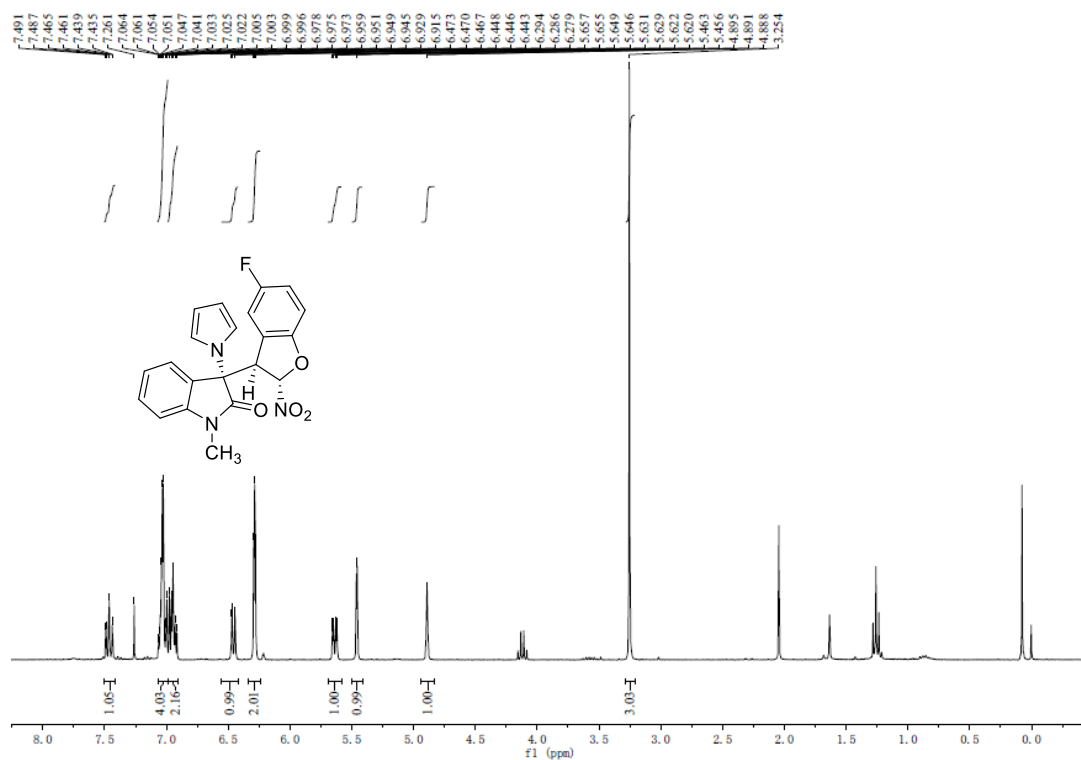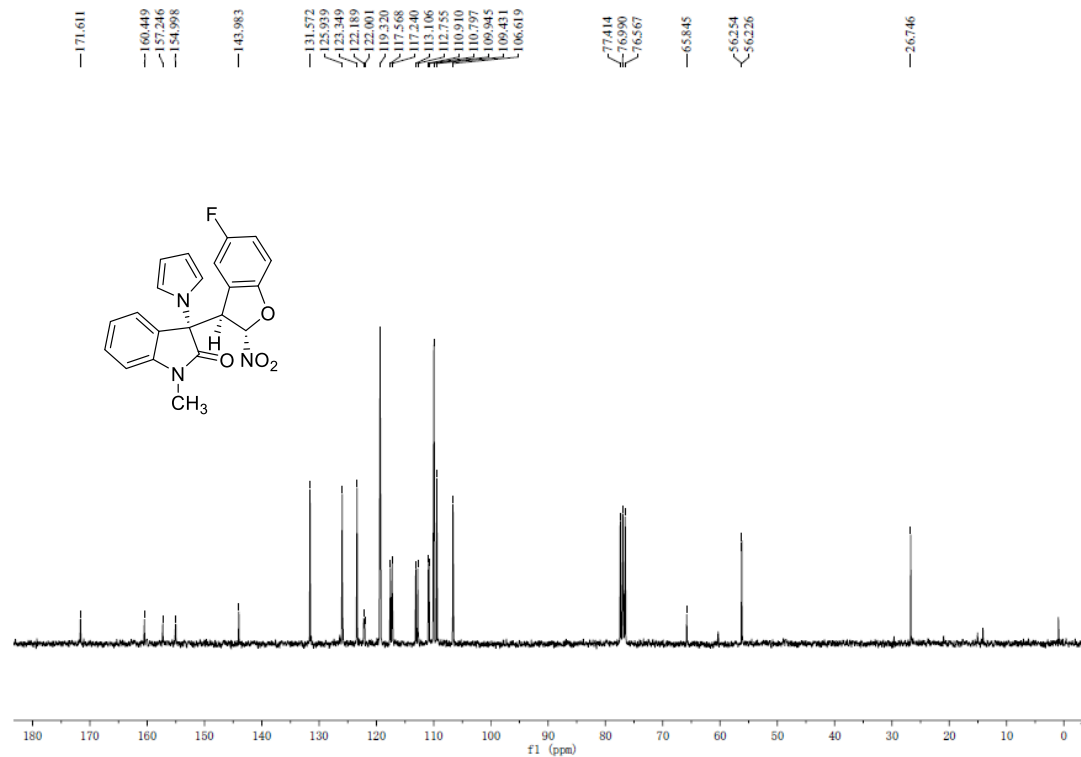



### HPLC of 3b

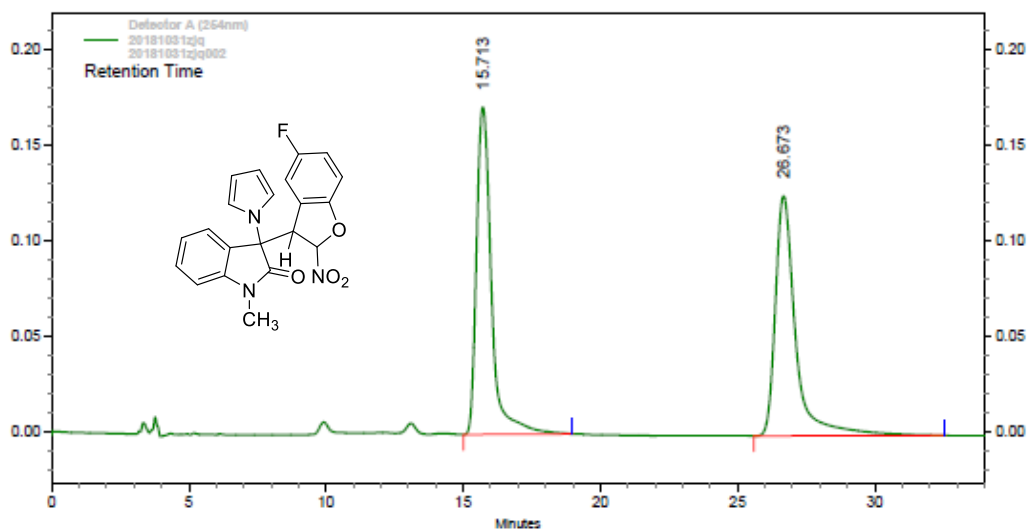

| Detector A (254nm) |                |        |                |          |              |  |
|--------------------|----------------|--------|----------------|----------|--------------|--|
| PK #               | Retention Time | Height | Height Percent | Area     | Area Percent |  |
| 1                  | 15.713         | 171427 | 57.70          | 6495074  | 50.00        |  |
| 2                  | 26.673         | 125656 | 42.30          | 6496250  | 50.00        |  |
| Totals             |                | 297083 | 100.00         | 12991324 | 100.00       |  |

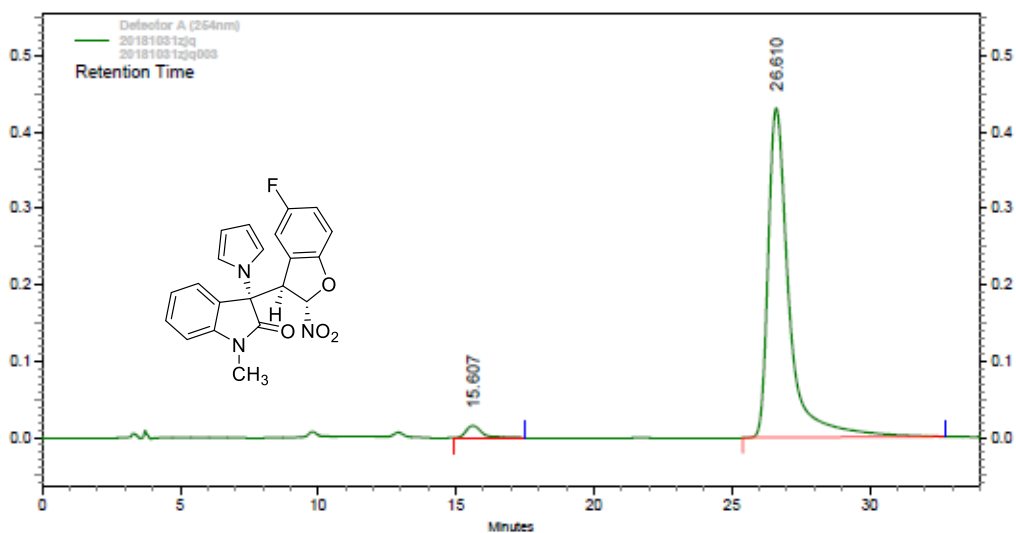

| Detector A (254nm) |                |        |                |          |              |  |
|--------------------|----------------|--------|----------------|----------|--------------|--|
| PK #               | Retention Time | Height | Height Percent | Area     | Area Percent |  |
| 1                  | 15.607         | 15245  | 3.41           | 573855   | 2.46         |  |
| 2                  | 26.610         | 431264 | 96.59          | 22713853 | 97.54        |  |
| Totals             |                | 446509 | 100.00         | 23287708 | 100.00       |  |

# <sup>1</sup>H and <sup>13</sup>C NMR of 3c

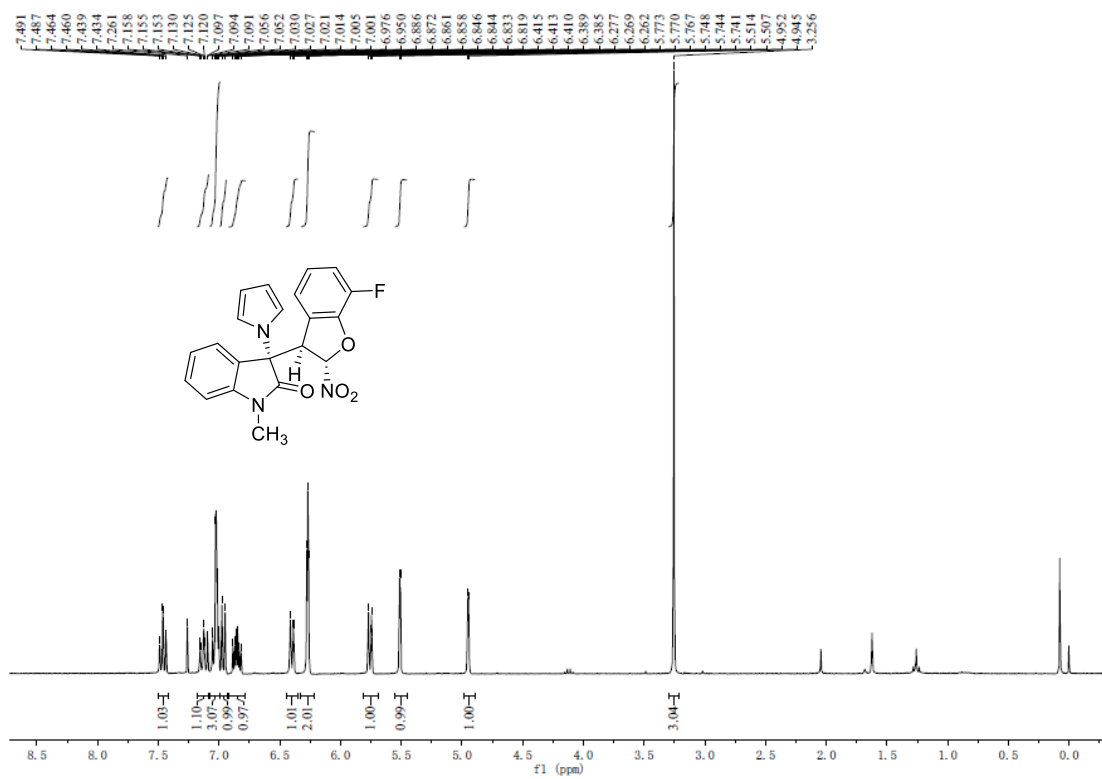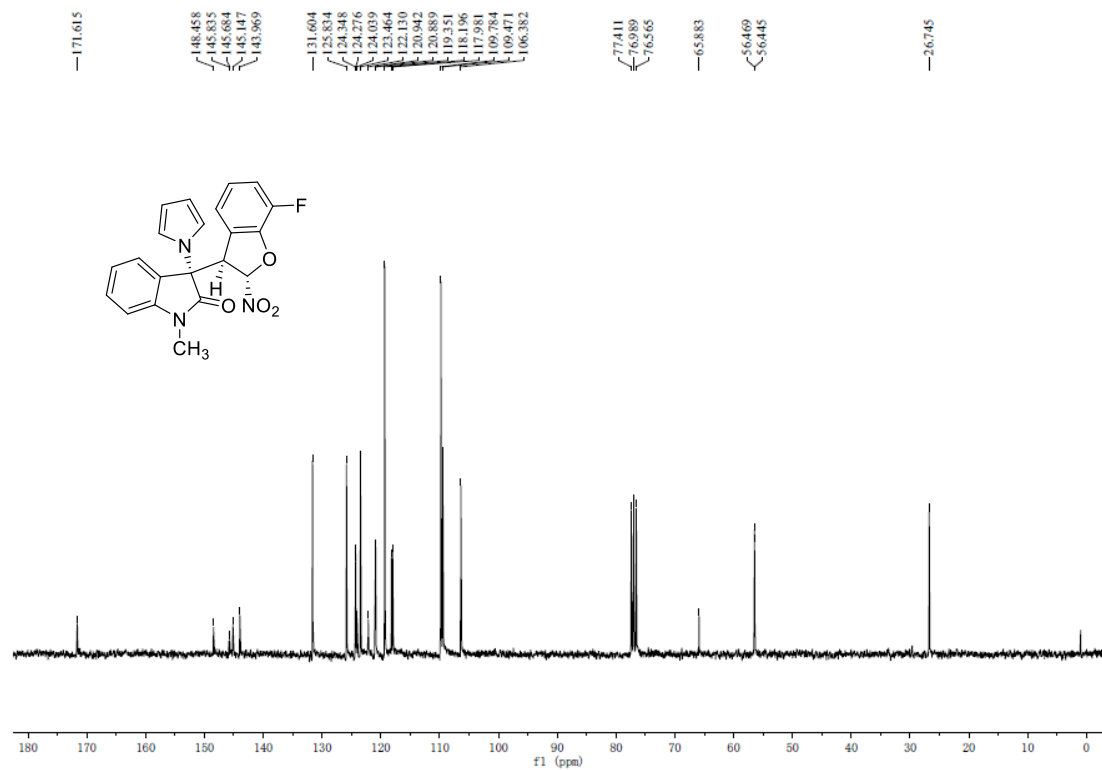

### HPLC of 3d

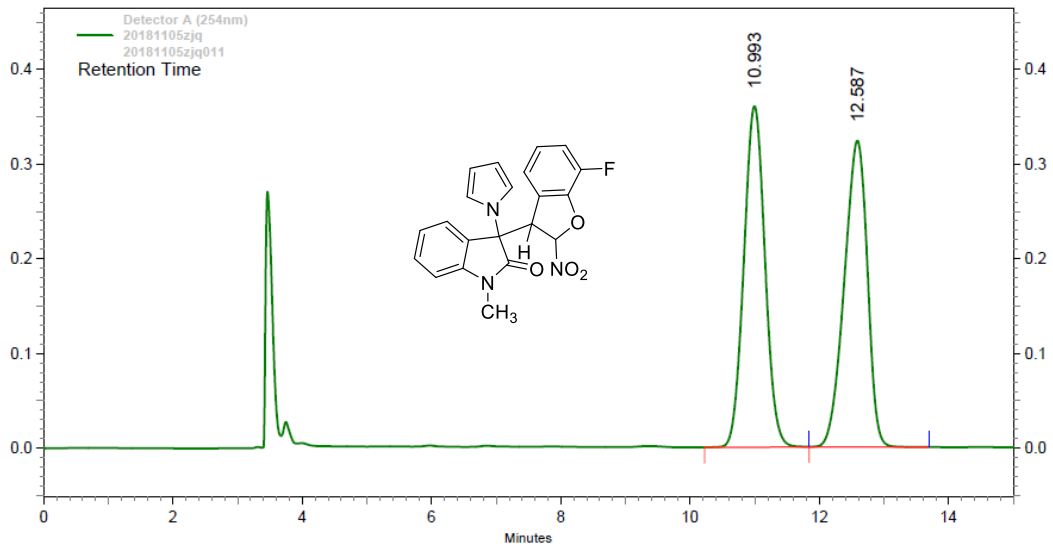

Detector  
A (254nm)

| PK #   | Retention Time | Height | Height Percent | Area     | Area Percent |
|--------|----------------|--------|----------------|----------|--------------|
| 1      | 10.993         | 360180 | 52.66          | 8178156  | 50.45        |
| 2      | 12.587         | 323732 | 47.34          | 8032784  | 49.55        |
| Totals |                | 683912 | 100.00         | 16210940 | 100.00       |

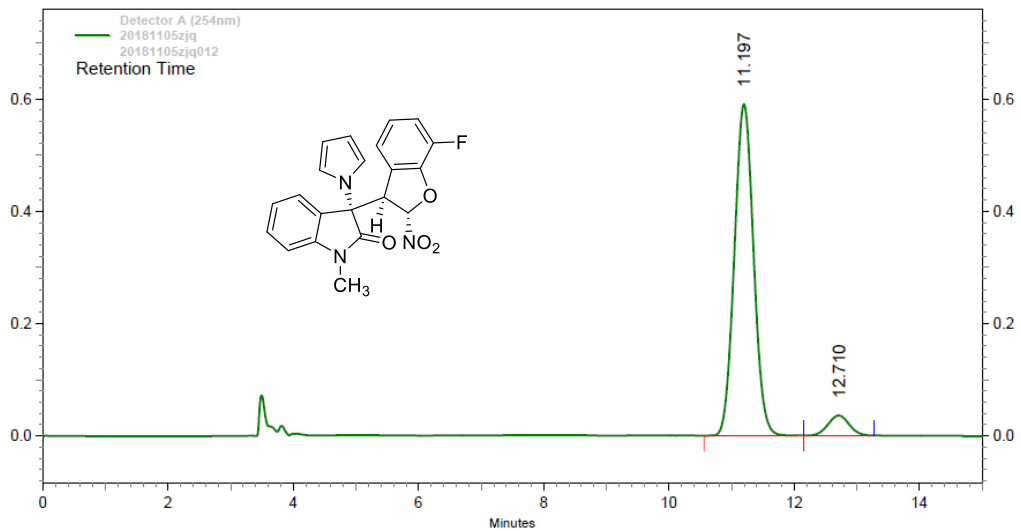

Detector  
A (254nm)

| PK #   | Retention Time | Height | Height Percent | Area     | Area Percent |
|--------|----------------|--------|----------------|----------|--------------|
| 1      | 11.197         | 590034 | 94.31          | 12559009 | 93.76        |
| 2      | 12.710         | 35579  | 5.69           | 836294   | 6.24         |
| Totals |                | 625613 | 100.00         | 13395303 | 100.00       |

# <sup>1</sup>H and <sup>13</sup>C NMR of 3d

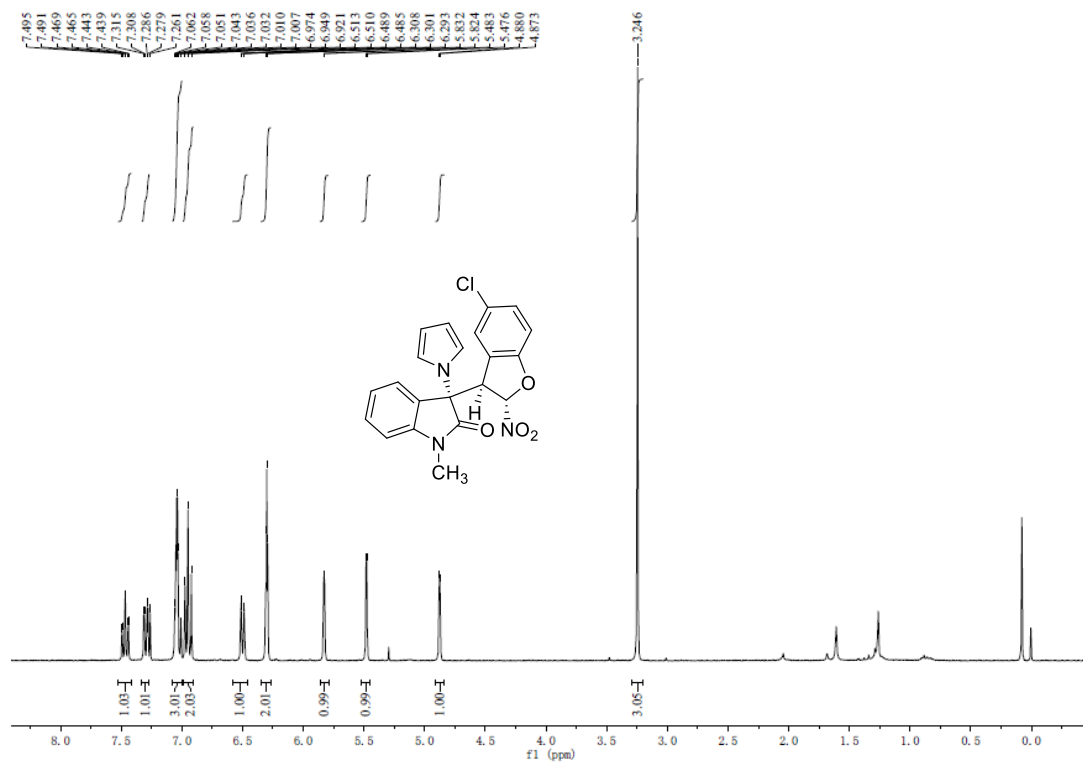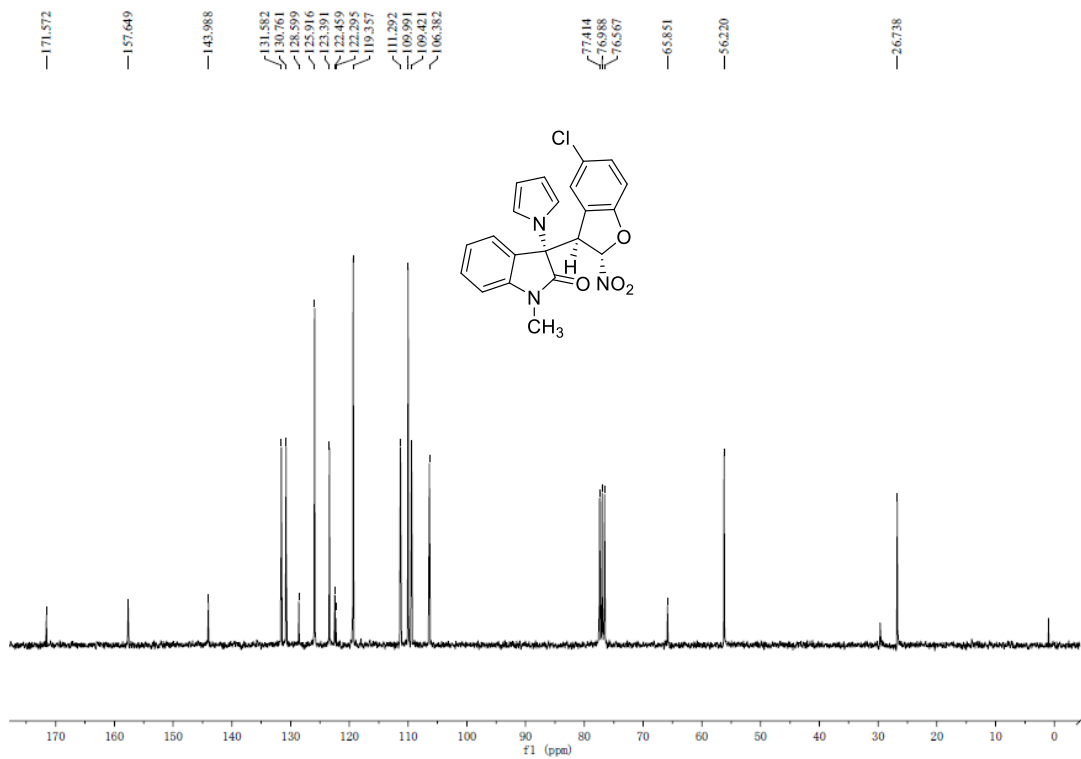

### HPLC of 3d

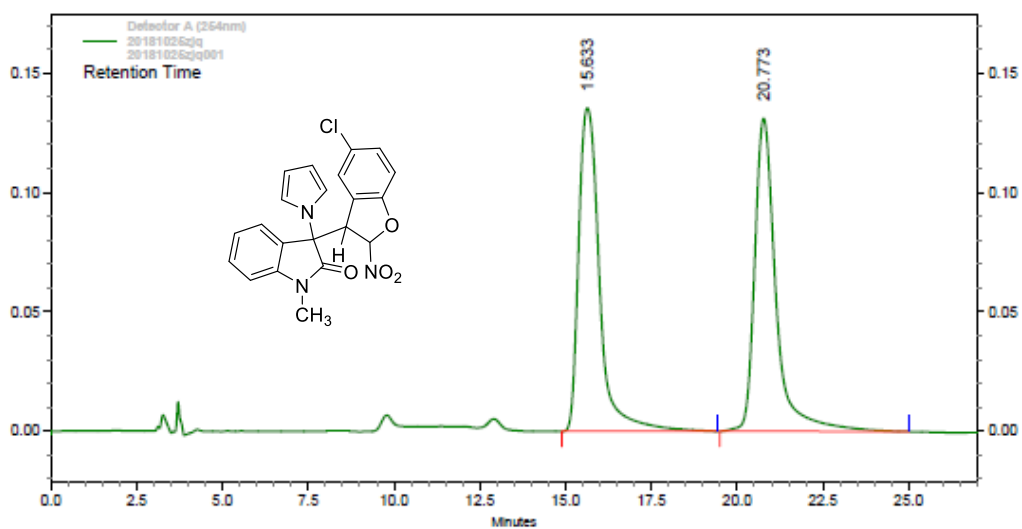

Detector  
A (254nm)

| Pk # | Retention Time | Height | Height Percent | Area    | Area Percent |
|------|----------------|--------|----------------|---------|--------------|
| 1    | 15.633         | 135359 | 50.82          | 5754196 | 50.35        |
| 2    | 20.773         | 130997 | 49.18          | 5673688 | 49.65        |

| Totals |  | 266356 | 100.00 | 11427884 | 100.00 |
|--------|--|--------|--------|----------|--------|
|--------|--|--------|--------|----------|--------|

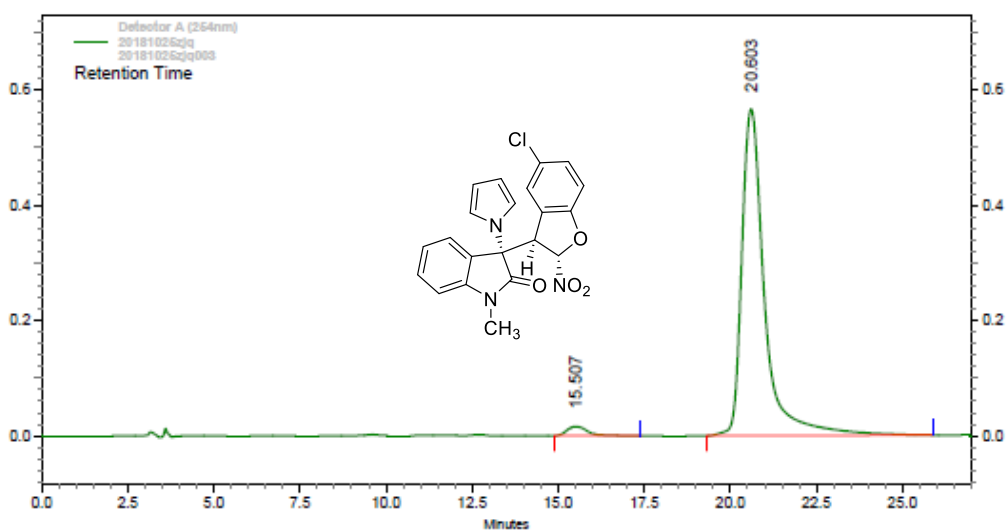

Detector  
A (254nm)

| Pk # | Retention Time | Height | Height Percent | Area     | Area Percent |
|------|----------------|--------|----------------|----------|--------------|
| 1    | 15.507         | 15690  | 2.69           | 647036   | 2.42         |
| 2    | 20.603         | 566719 | 97.31          | 26106923 | 97.58        |

| Totals |  | 582409 | 100.00 | 26753959 | 100.00 |
|--------|--|--------|--------|----------|--------|
|--------|--|--------|--------|----------|--------|



### HPLC of 3e

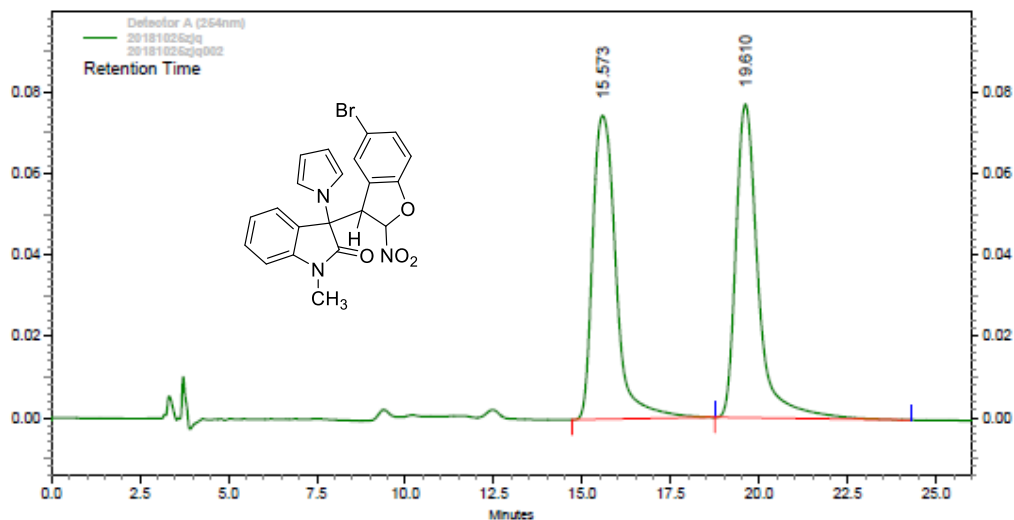

| Detector A (254nm) |                |        |                |         |              |
|--------------------|----------------|--------|----------------|---------|--------------|
| Pk #               | Retention Time | Height | Height Percent | Area    | Area Percent |
| 1                  | 15.573         | 74612  | 49.20          | 3420476 | 50.34        |
| 2                  | 19.610         | 77024  | 50.80          | 3374362 | 49.66        |

|        |  |        |        |         |        |
|--------|--|--------|--------|---------|--------|
| Totals |  | 151636 | 100.00 | 6794838 | 100.00 |
|--------|--|--------|--------|---------|--------|

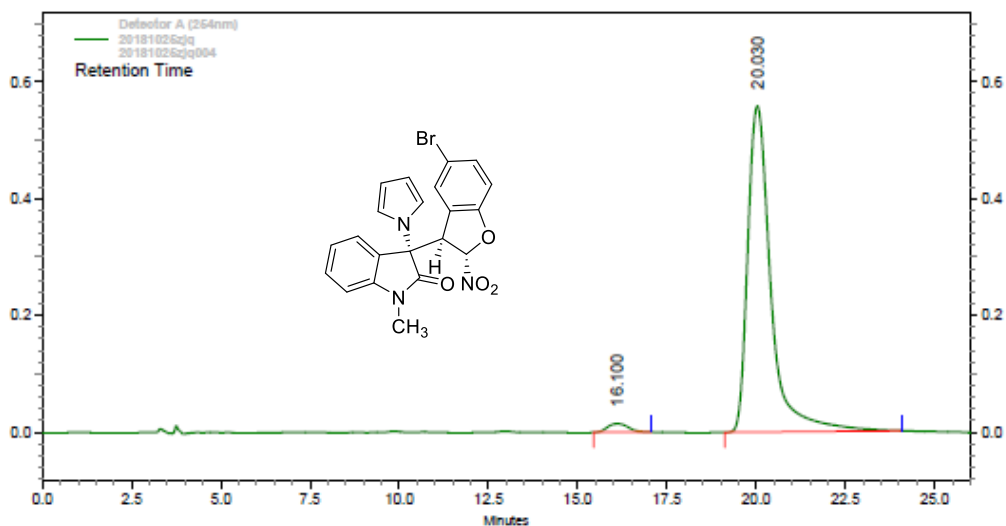

| Detector A (254nm) |                |        |                |          |              |
|--------------------|----------------|--------|----------------|----------|--------------|
| Pk #               | Retention Time | Height | Height Percent | Area     | Area Percent |
| 1                  | 16.100         | 14284  | 2.50           | 574307   | 2.23         |
| 2                  | 20.030         | 557608 | 97.50          | 25220661 | 97.77        |

|        |  |        |        |          |        |
|--------|--|--------|--------|----------|--------|
| Totals |  | 571892 | 100.00 | 25794968 | 100.00 |
|--------|--|--------|--------|----------|--------|

$^1\text{H}$  and  $^{13}\text{C}$  NMR of **3f**

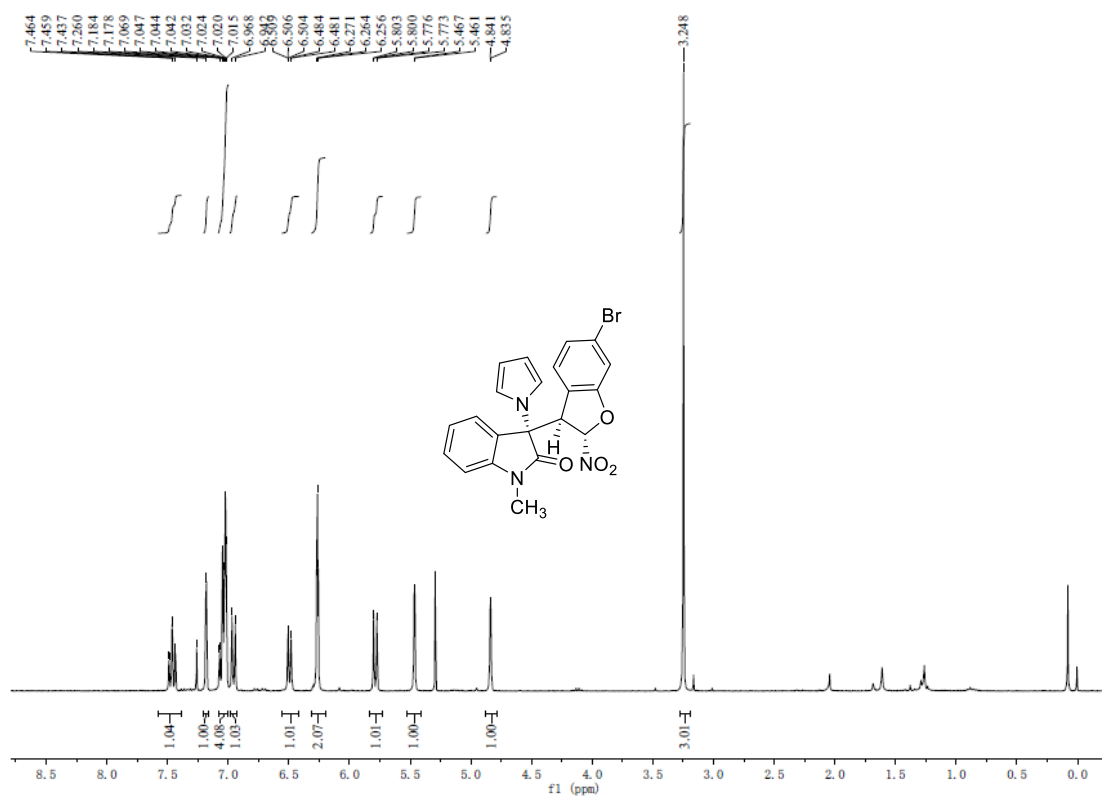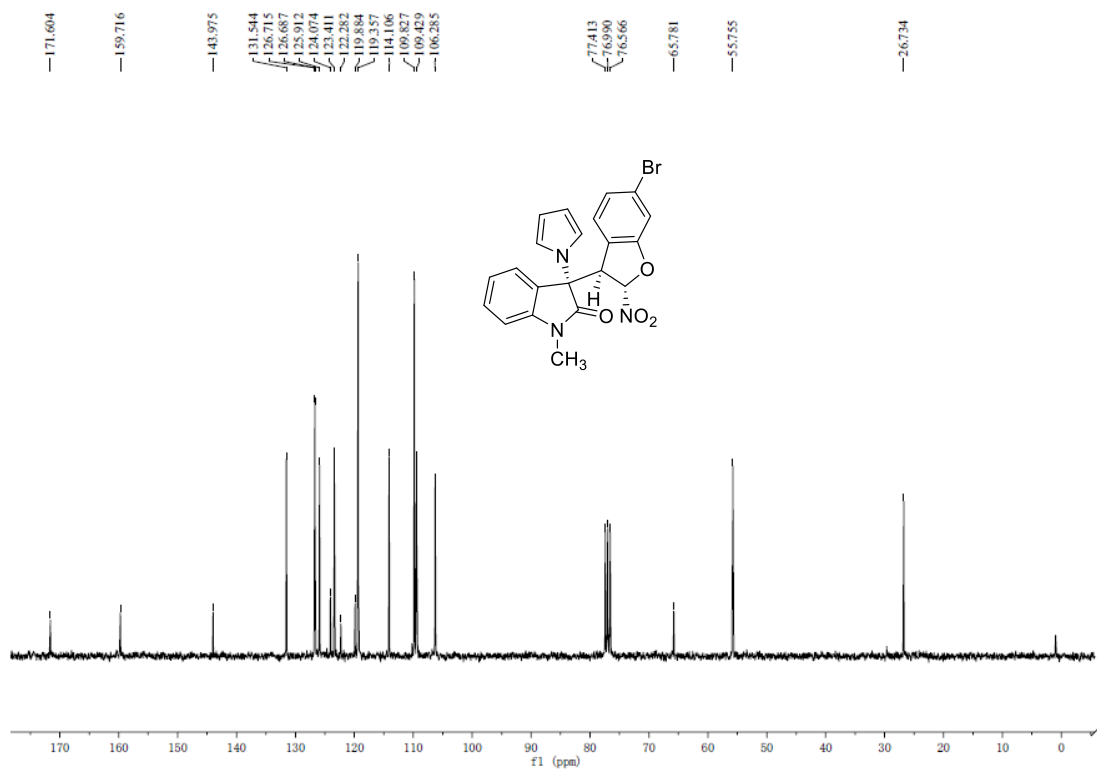



### HPLC of 3f

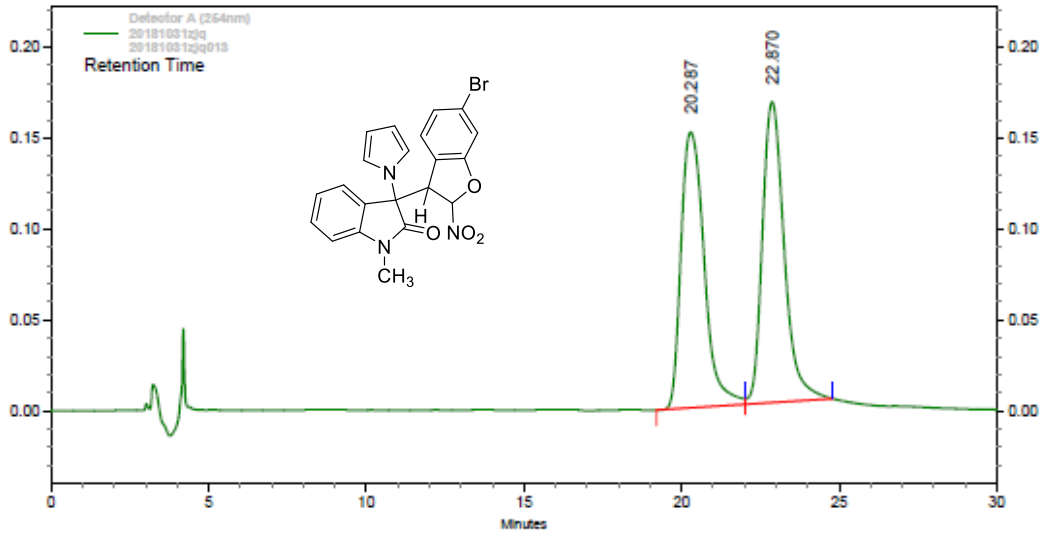

| Detector A (254nm) |                |        |                |         |              |  |
|--------------------|----------------|--------|----------------|---------|--------------|--|
| Pk #               | Retention Time | Height | Height Percent | Area    | Area Percent |  |
| 1                  | 20.287         | 151584 | 47.81          | 7769598 | 49.32        |  |
| 2                  | 22.870         | 165453 | 52.19          | 7982300 | 50.68        |  |

| Totals |  |        |        |          |        |
|--------|--|--------|--------|----------|--------|
|        |  | 317037 | 100.00 | 15751898 | 100.00 |

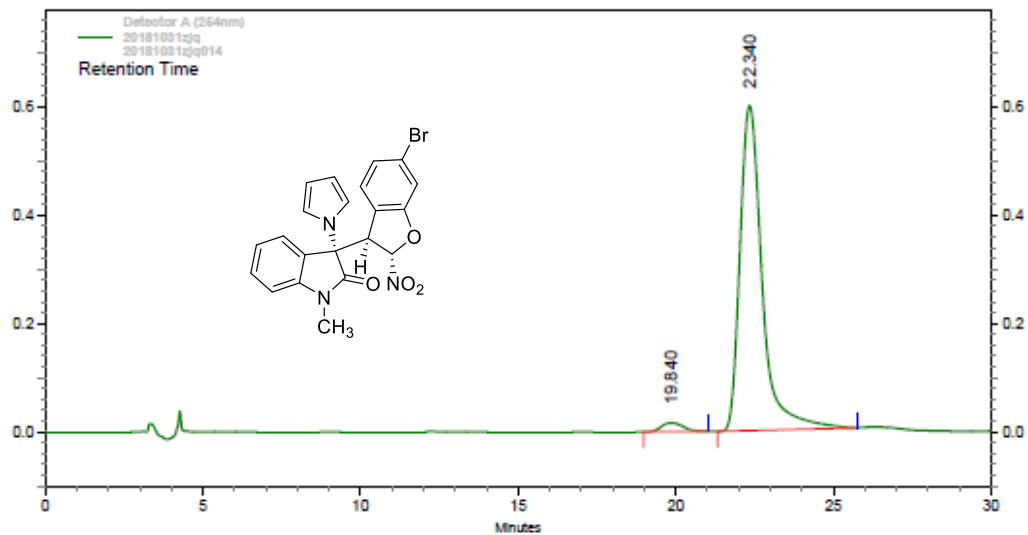

| Detector A (254nm) |                |        |                |          |              |  |
|--------------------|----------------|--------|----------------|----------|--------------|--|
| Pk #               | Retention Time | Height | Height Percent | Area     | Area Percent |  |
| 1                  | 19.840         | 16221  | 2.63           | 769633   | 2.55         |  |
| 2                  | 22.340         | 600206 | 97.37          | 29364555 | 97.45        |  |

| Totals |  |        |        |          |        |
|--------|--|--------|--------|----------|--------|
|        |  | 616427 | 100.00 | 30134188 | 100.00 |

<sup>1</sup>H and <sup>13</sup>C NMR of 3g

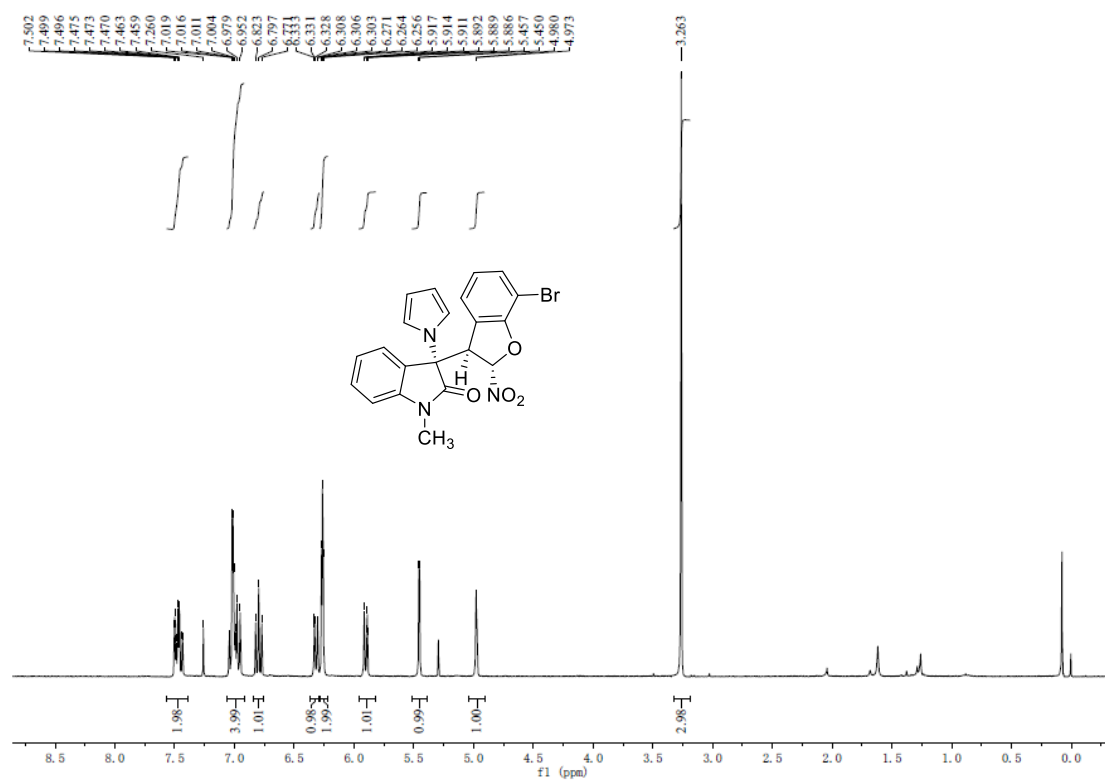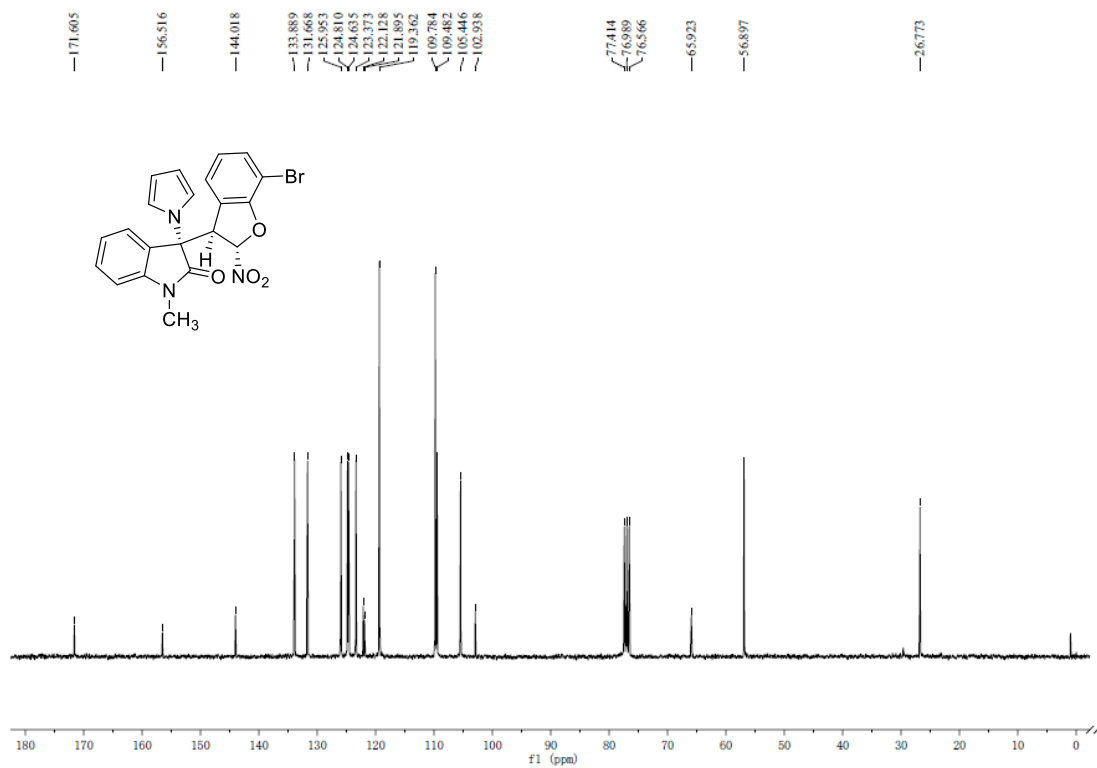

### HPLC of 3g

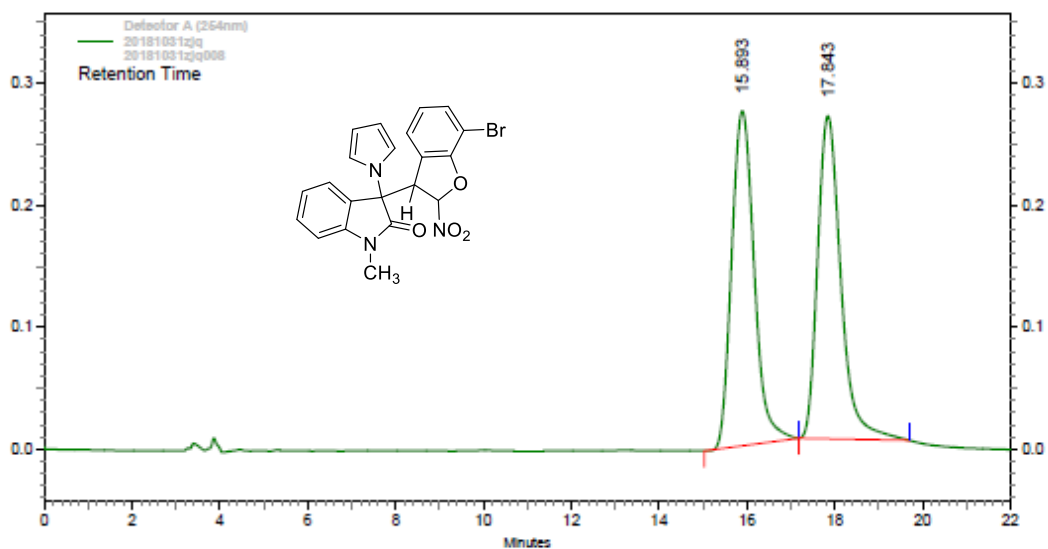

Detector A (254nm)

| Pk #   | Retention Time | Height | Height Percent | Area     | Area Percent |
|--------|----------------|--------|----------------|----------|--------------|
| 1      | 15.893         | 274660 | 50.90          | 9773357  | 50.08        |
| 2      | 17.843         | 264943 | 49.10          | 9742737  | 49.92        |
| Totals |                | 539603 | 100.00         | 19516094 | 100.00       |

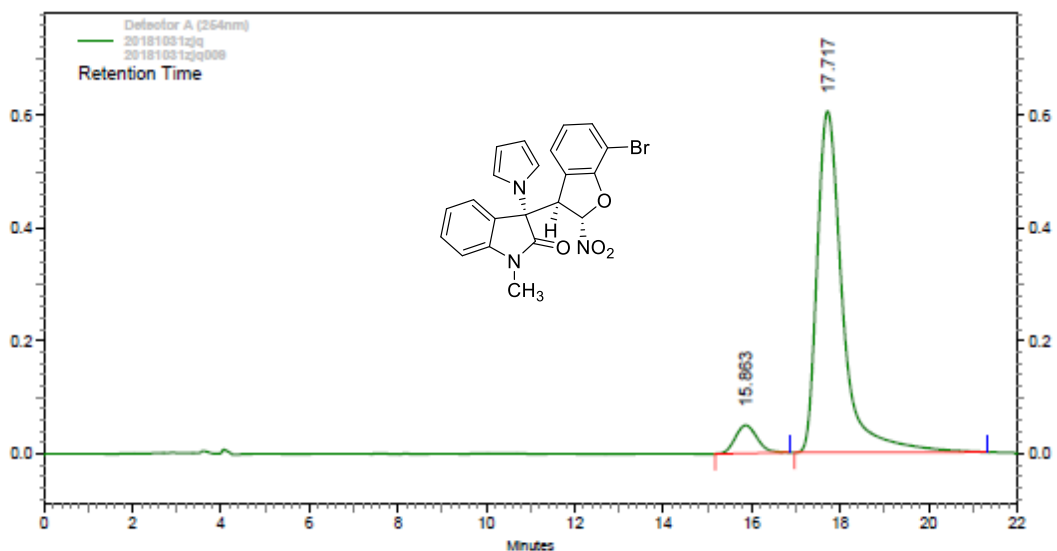

Detector A (254nm)

| Pk #   | Retention Time | Height | Height Percent | Area     | Area Percent |
|--------|----------------|--------|----------------|----------|--------------|
| 1      | 15.863         | 49630  | 7.58           | 1704339  | 6.59         |
| 2      | 17.717         | 605170 | 92.42          | 24154495 | 93.41        |
| Totals |                | 654800 | 100.00         | 25858834 | 100.00       |

<sup>1</sup>H and <sup>13</sup>C NMR of 3h

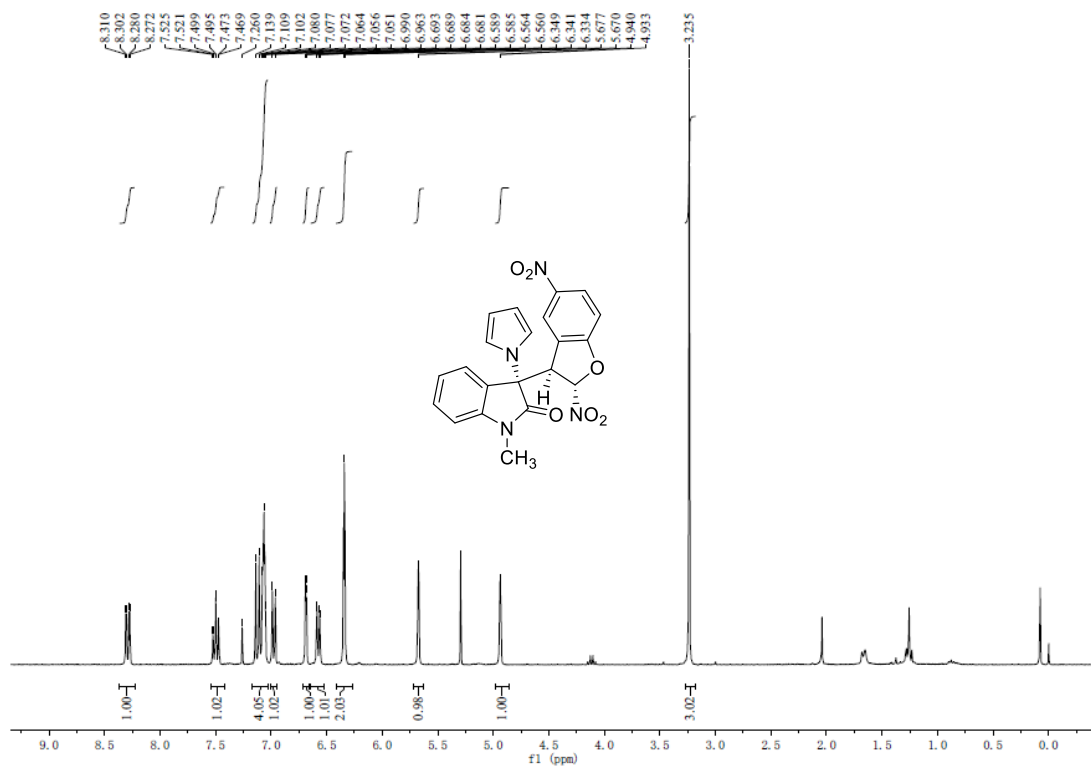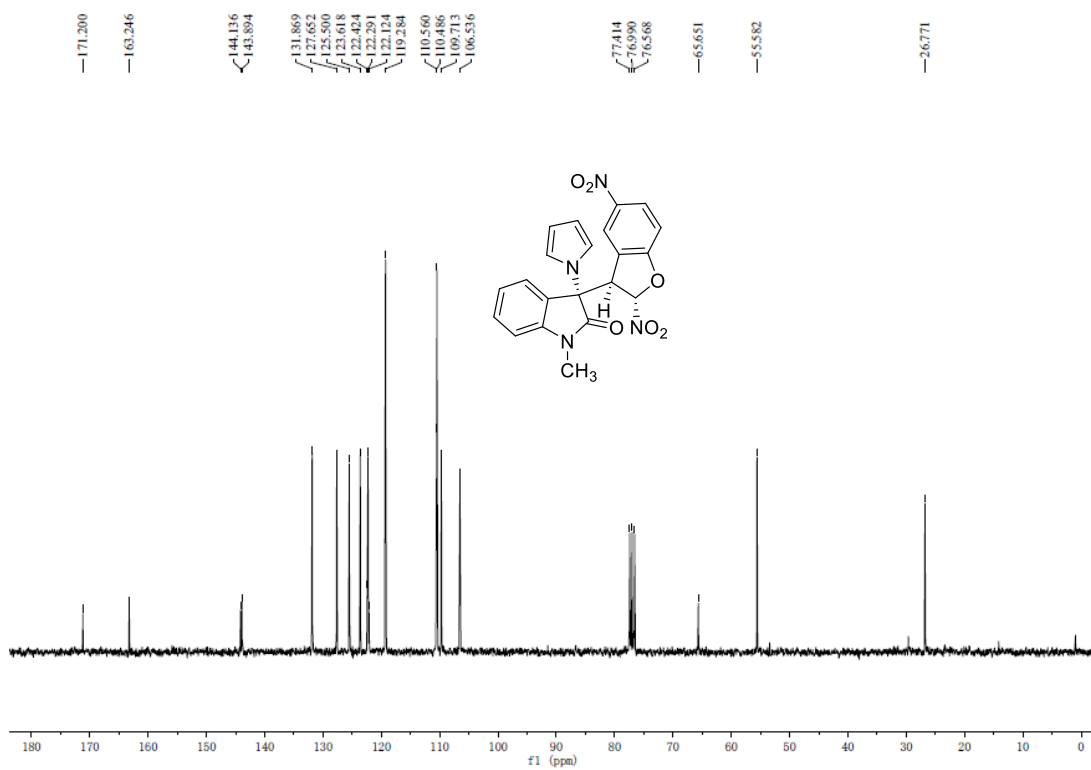

### HPLC of 3h

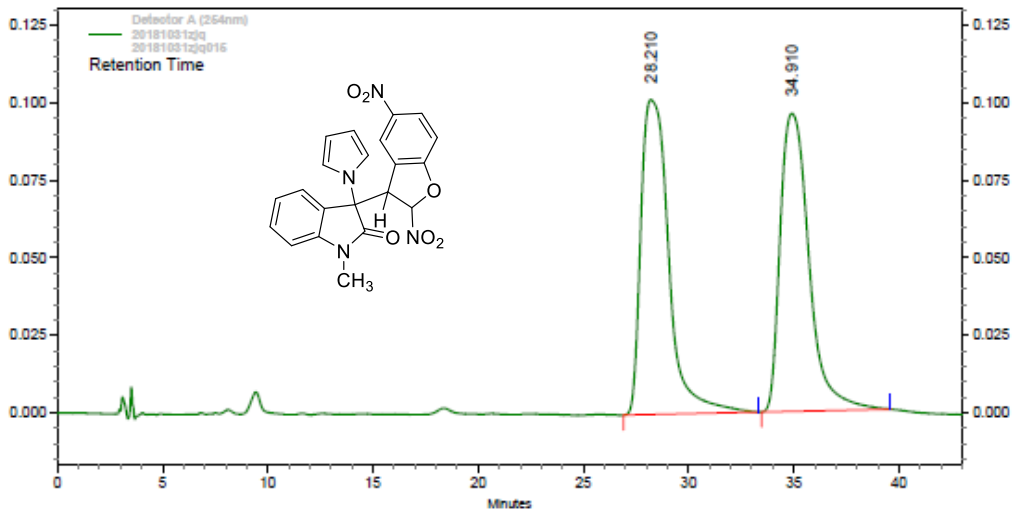

| Detector A (254nm) |                |        |                |          |              |  |
|--------------------|----------------|--------|----------------|----------|--------------|--|
| Pk #               | Retention Time | Height | Height Percent | Area     | Area Percent |  |
| 1                  | 28.210         | 101541 | 51.37          | 9347097  | 50.50        |  |
| 2                  | 34.910         | 96110  | 48.63          | 9162239  | 49.50        |  |
| Totals             |                | 197651 | 100.00         | 18509336 | 100.00       |  |

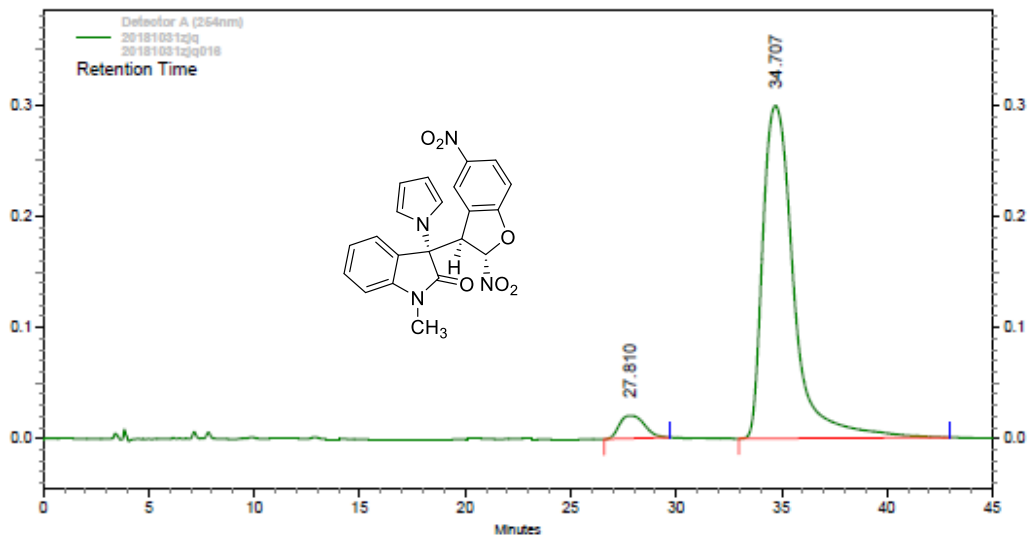

| Detector A (254nm) |                |        |                |          |              |  |
|--------------------|----------------|--------|----------------|----------|--------------|--|
| Pk #               | Retention Time | Height | Height Percent | Area     | Area Percent |  |
| 1                  | 27.810         | 20421  | 6.39           | 1690166  | 5.22         |  |
| 2                  | 34.707         | 299324 | 93.61          | 30695688 | 94.78        |  |
| Totals             |                | 319745 | 100.00         | 32385854 | 100.00       |  |

<sup>1</sup>H and <sup>13</sup>C NMR of **3i**

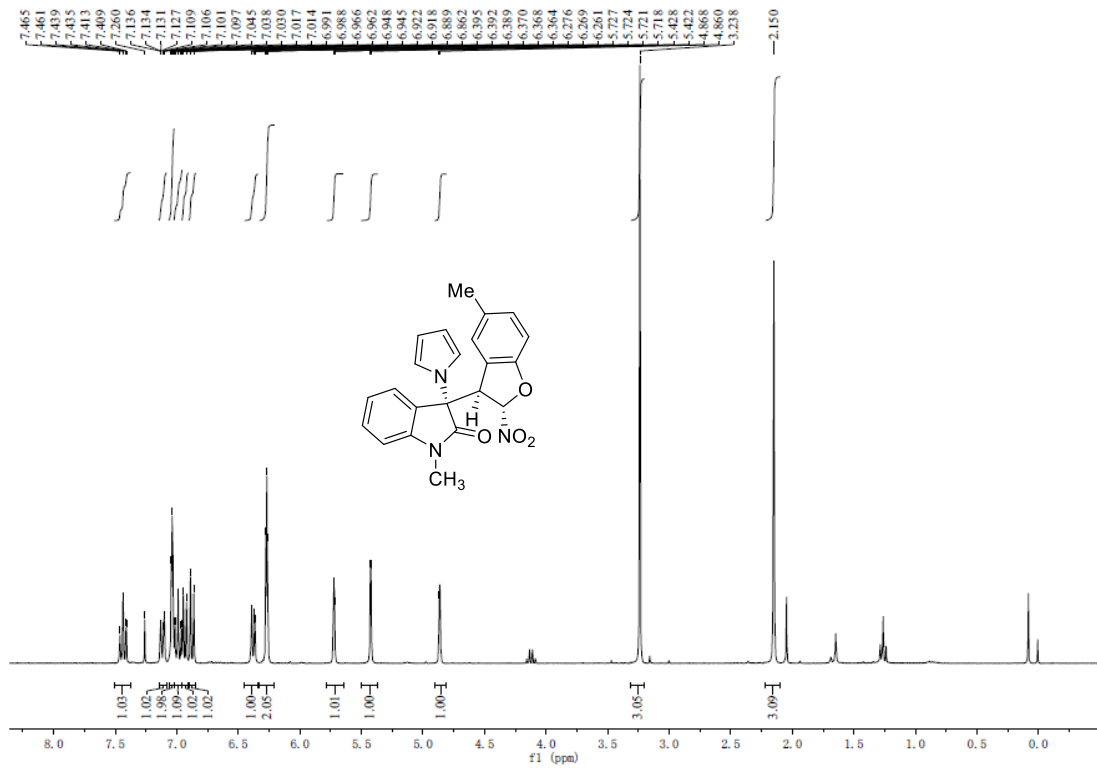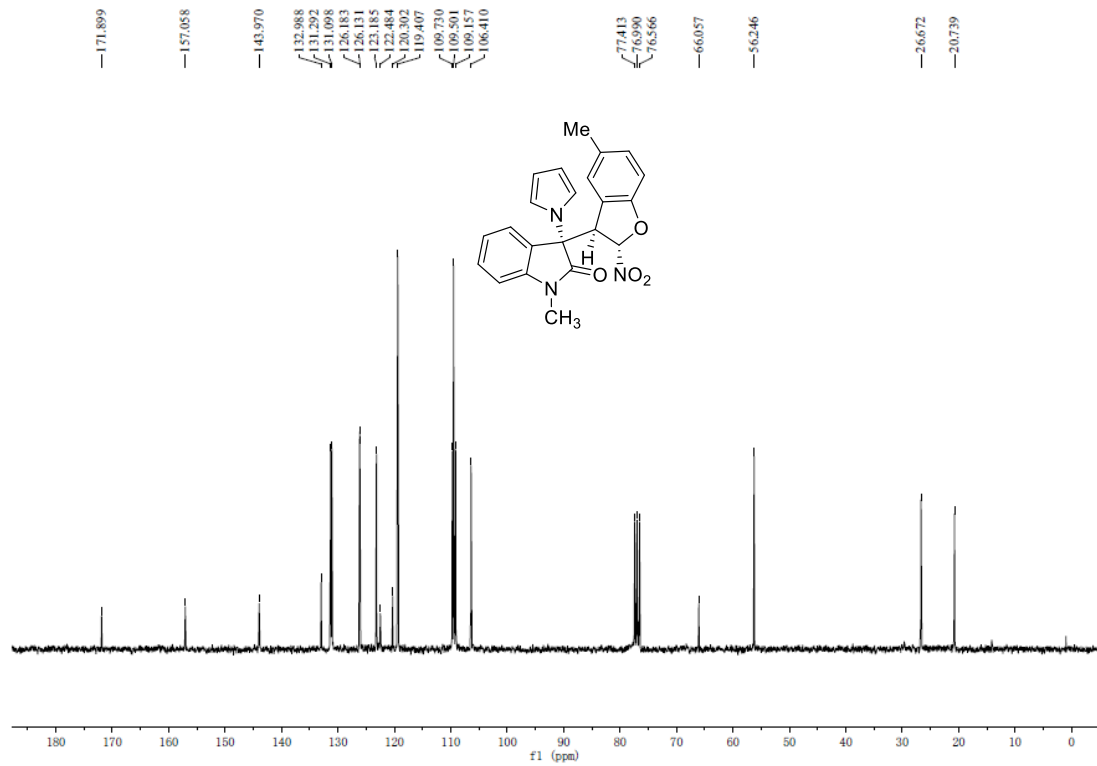

### HPLC of 3i

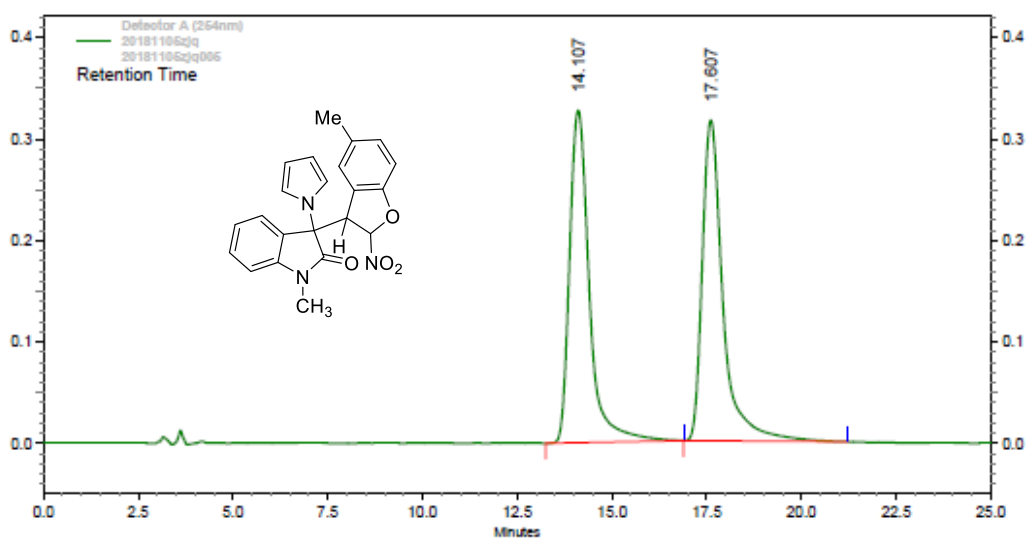

**Detector A (254nm)**

| Pk #          | Retention Time | Height | Height Percent | Area     | Area Percent |
|---------------|----------------|--------|----------------|----------|--------------|
| 1             | 14.107         | 327637 | 50.90          | 11867576 | 49.64        |
| 2             | 17.607         | 316092 | 49.10          | 12038595 | 50.36        |
| <b>Totals</b> |                | 643729 | 100.00         | 23906171 | 100.00       |

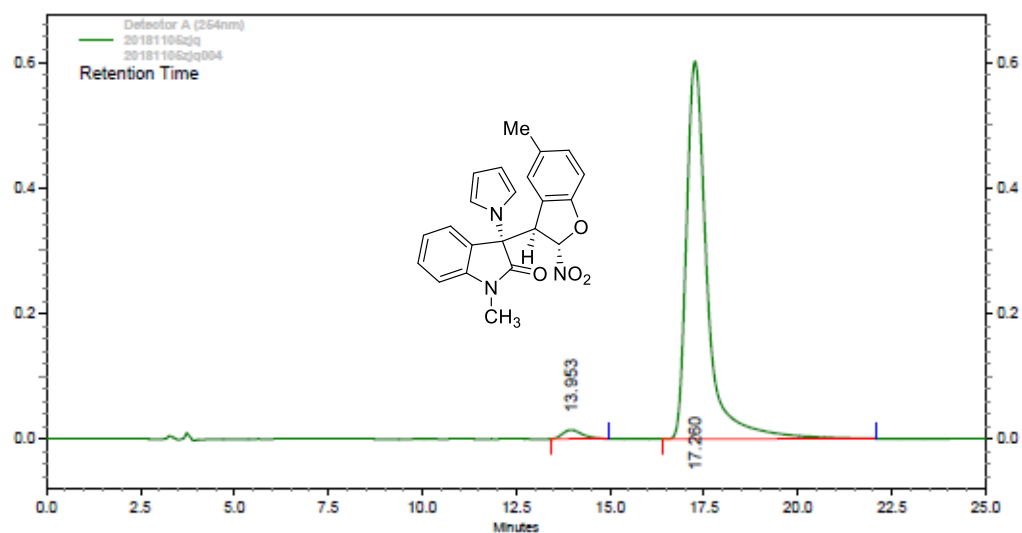

**Detector A (254nm)**

| Pk #          | Retention Time | Height | Height Percent | Area     | Area Percent |
|---------------|----------------|--------|----------------|----------|--------------|
| 1             | 13.953         | 14096  | 2.29           | 513620   | 2.18         |
| 2             | 17.260         | 600771 | 97.71          | 23070048 | 97.82        |
| <b>Totals</b> |                | 614867 | 100.00         | 23583668 | 100.00       |

<sup>1</sup>H and <sup>13</sup>C NMR of 3j

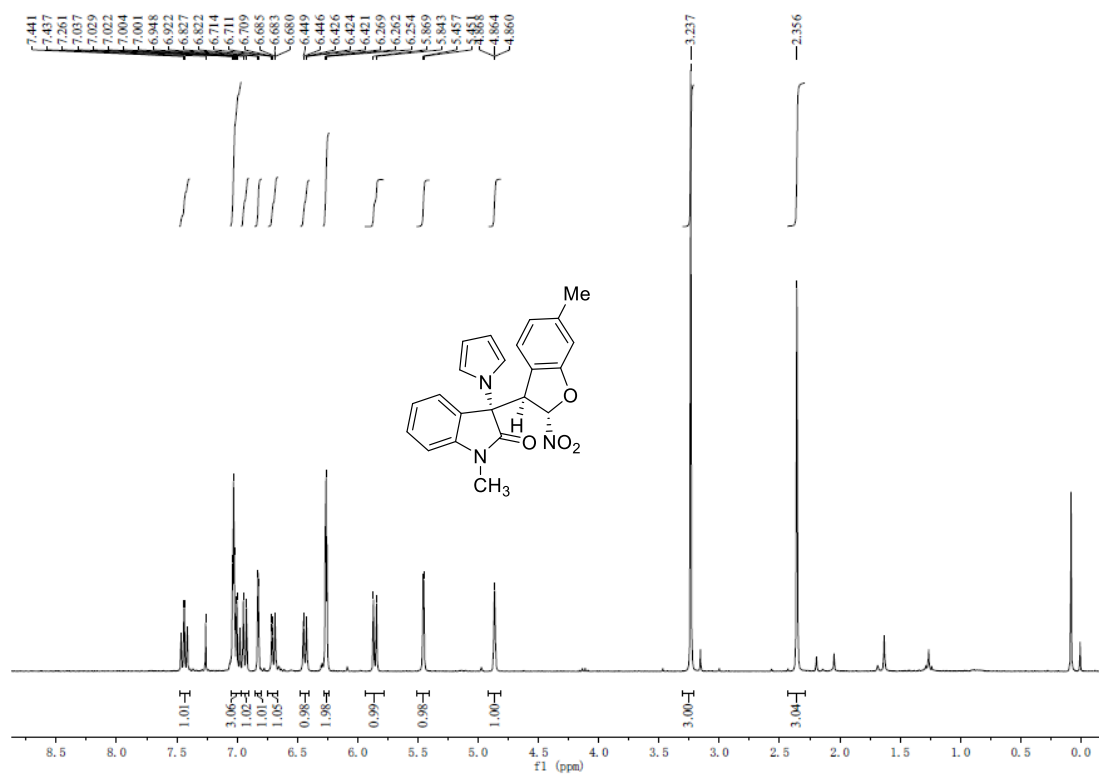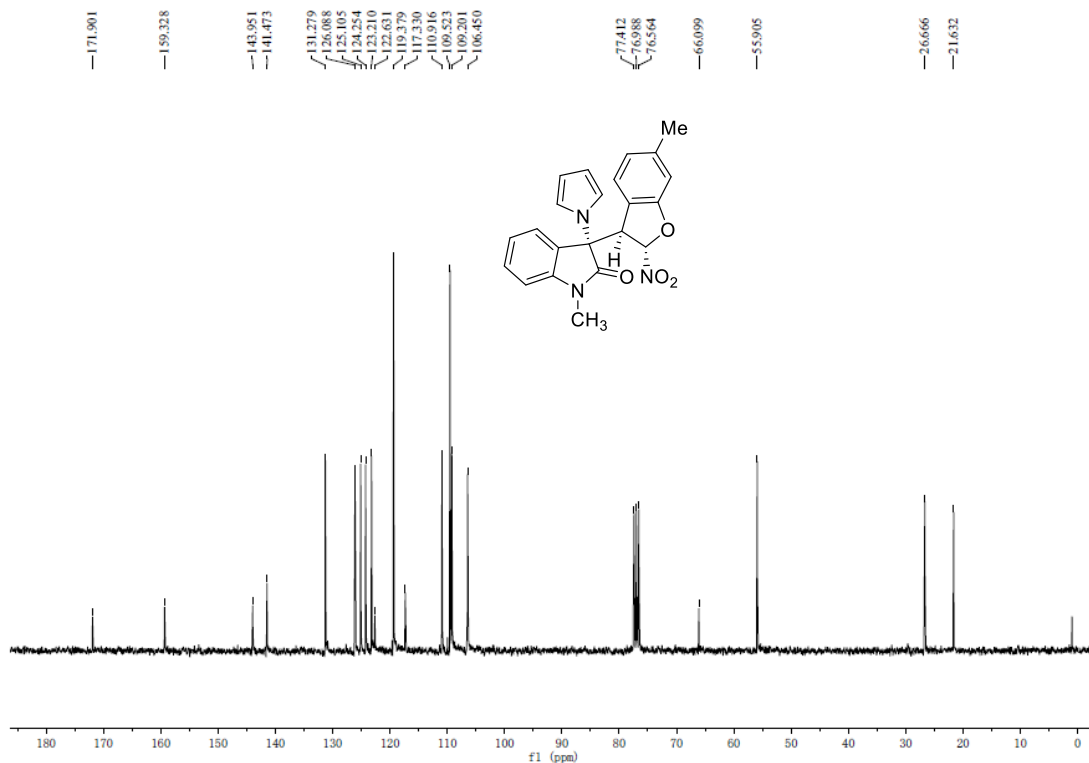



### HPLC of 3j

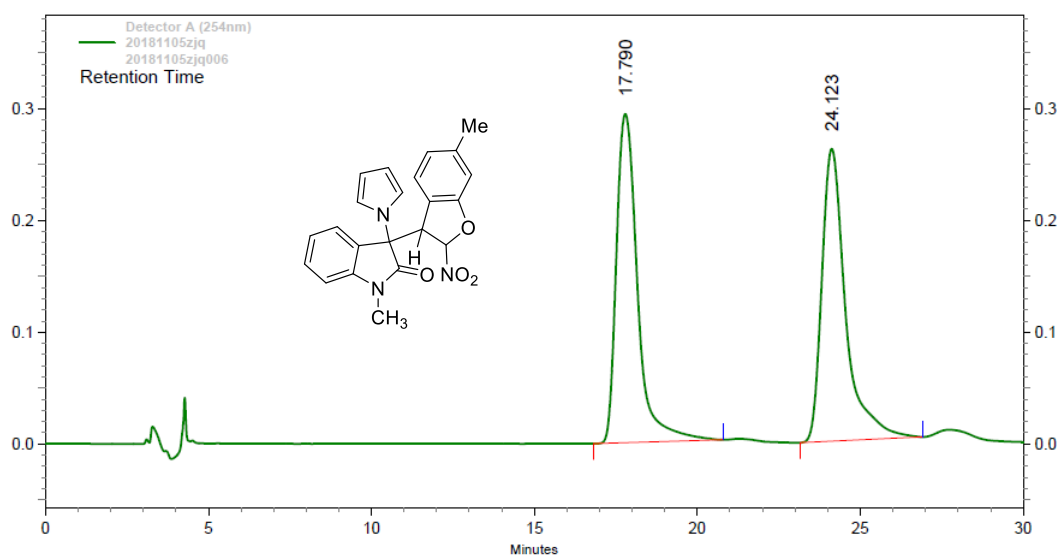

Detector  
A (254nm)

| PK # | Retention Time | Height | Height Percent | Area     | Area Percent |
|------|----------------|--------|----------------|----------|--------------|
| 1    | 17.790         | 294075 | 52.93          | 13263310 | 49.96        |
| 2    | 24.123         | 261543 | 47.07          | 13285368 | 50.04        |

| Totals |  | 555618 | 100.00 | 26548678 | 100.00 |
|--------|--|--------|--------|----------|--------|
|--------|--|--------|--------|----------|--------|

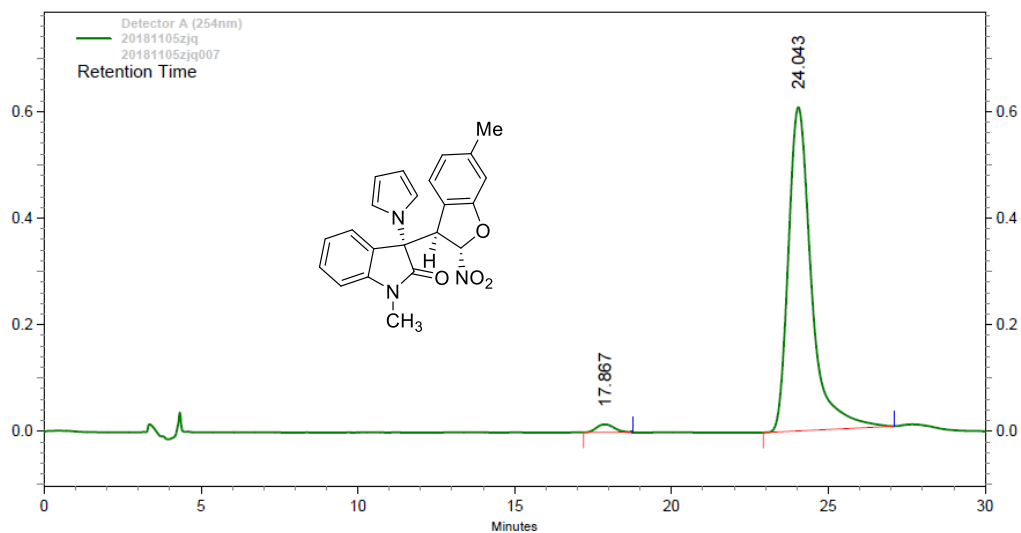

Detector  
A (254nm)

| PK # | Retention Time | Height | Height Percent | Area     | Area Percent |
|------|----------------|--------|----------------|----------|--------------|
| 1    | 17.867         | 14862  | 2.39           | 575780   | 1.83         |
| 2    | 24.043         | 606899 | 97.61          | 30967105 | 98.17        |

| Totals |  | 621761 | 100.00 | 31542885 | 100.00 |
|--------|--|--------|--------|----------|--------|
|--------|--|--------|--------|----------|--------|

# $^1\text{H}$ and $^{13}\text{C}$ NMR of **3k**

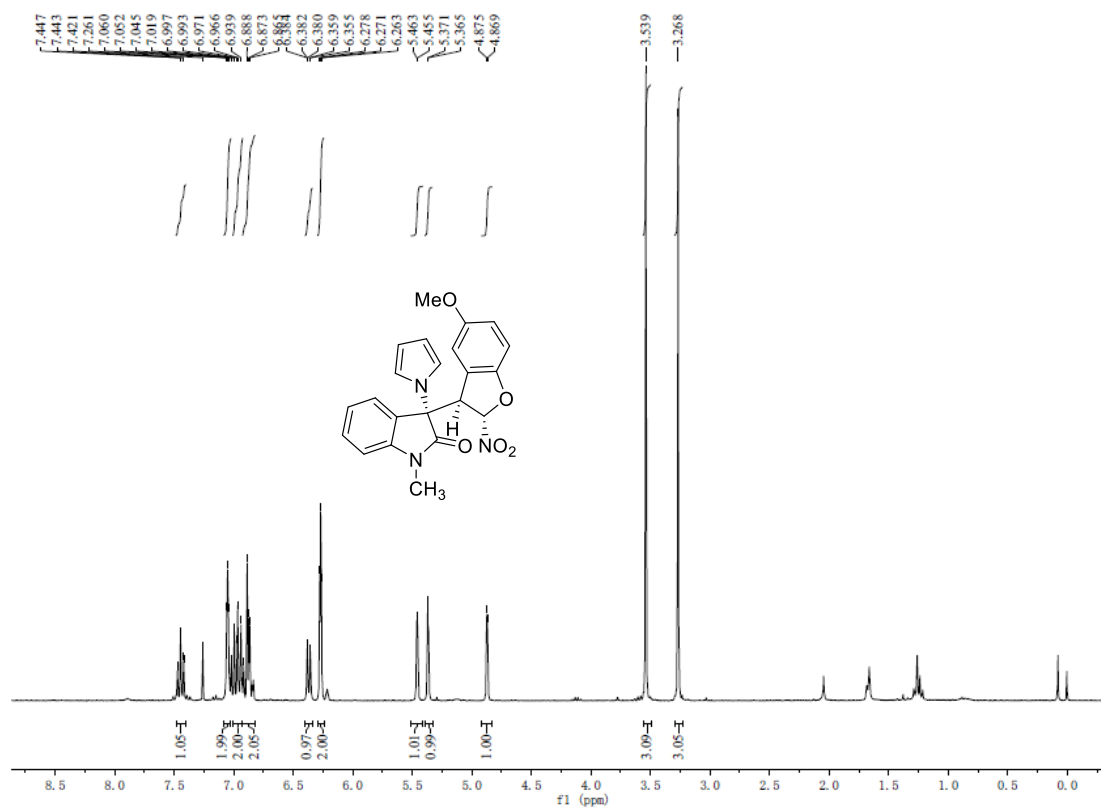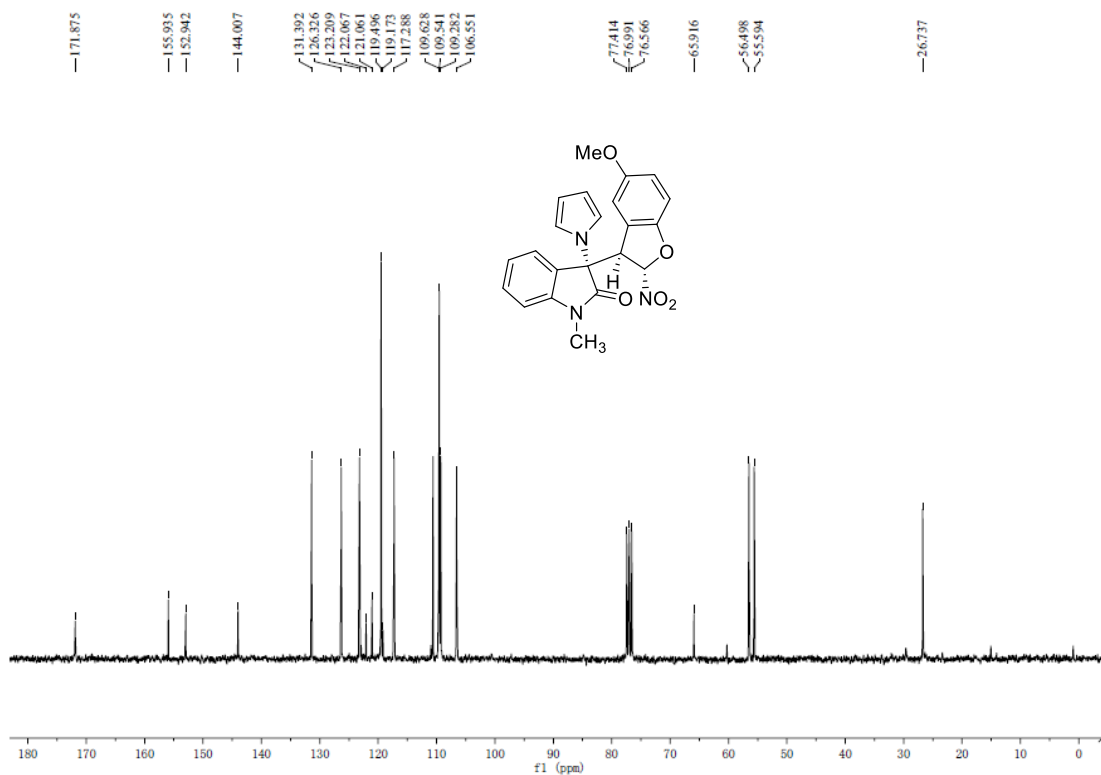

### HPLC of 3k

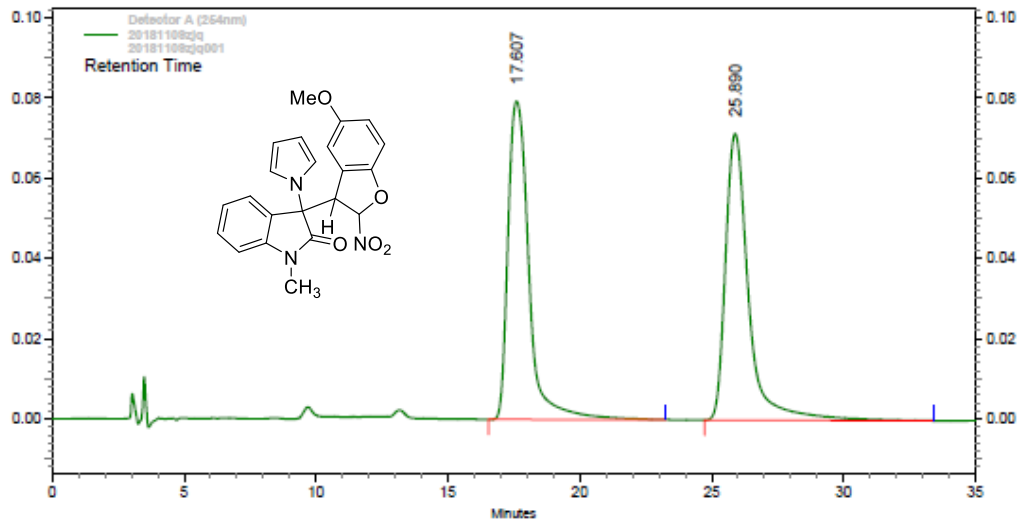

Detector  
A (254nm)

| Pk # | Retention Time | Height | Height Percent | Area    | Area Percent |
|------|----------------|--------|----------------|---------|--------------|
| 1    | 17.607         | 79294  | 52.61          | 4373464 | 50.15        |
| 2    | 25.890         | 71439  | 47.39          | 4347276 | 49.85        |

| Totals |  | 150733 | 100.00 | 8720740 | 100.00 |
|--------|--|--------|--------|---------|--------|
|--------|--|--------|--------|---------|--------|

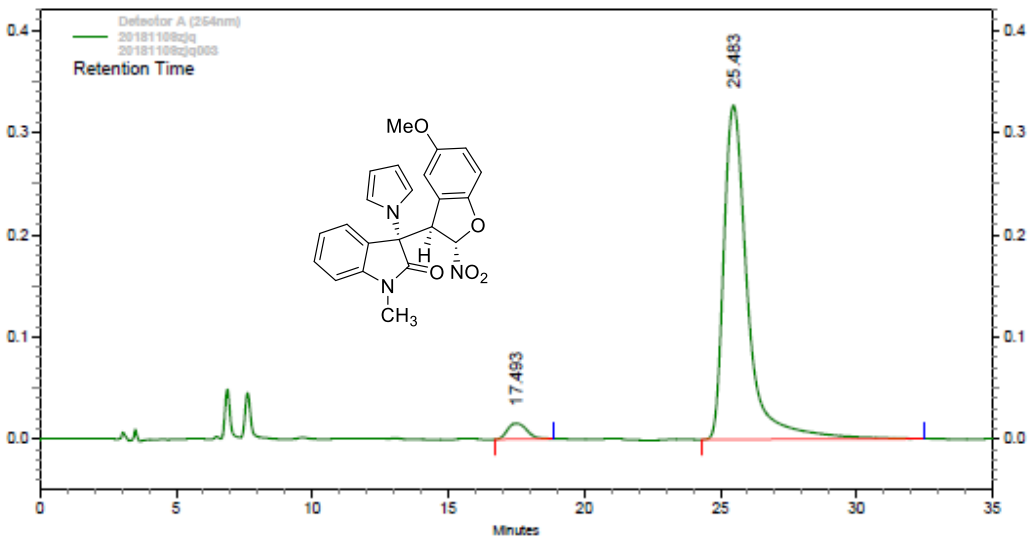

Detector  
A (254nm)

| Pk # | Retention Time | Height | Height Percent | Area     | Area Percent |
|------|----------------|--------|----------------|----------|--------------|
| 1    | 17.493         | 15457  | 4.52           | 762876   | 3.70         |
| 2    | 25.483         | 326706 | 95.48          | 19876254 | 96.30        |

| Totals |  | 342163 | 100.00 | 20639130 | 100.00 |
|--------|--|--------|--------|----------|--------|
|--------|--|--------|--------|----------|--------|

<sup>1</sup>H and <sup>13</sup>C NMR of 3I

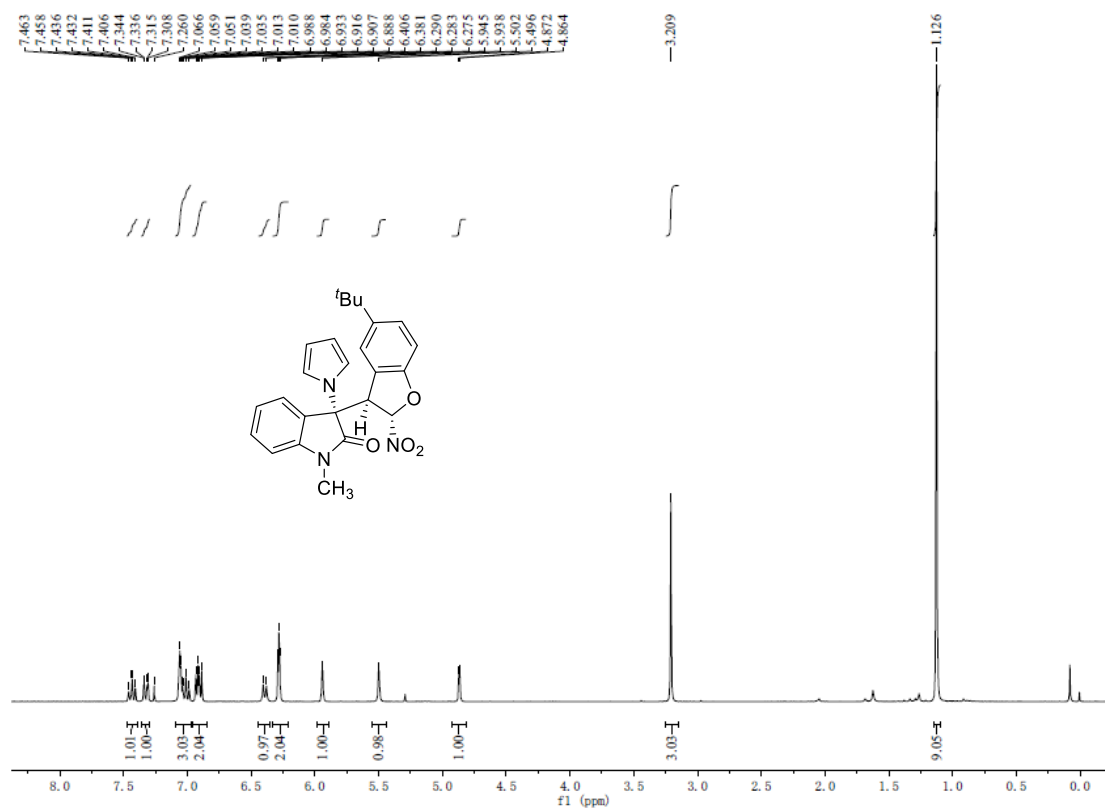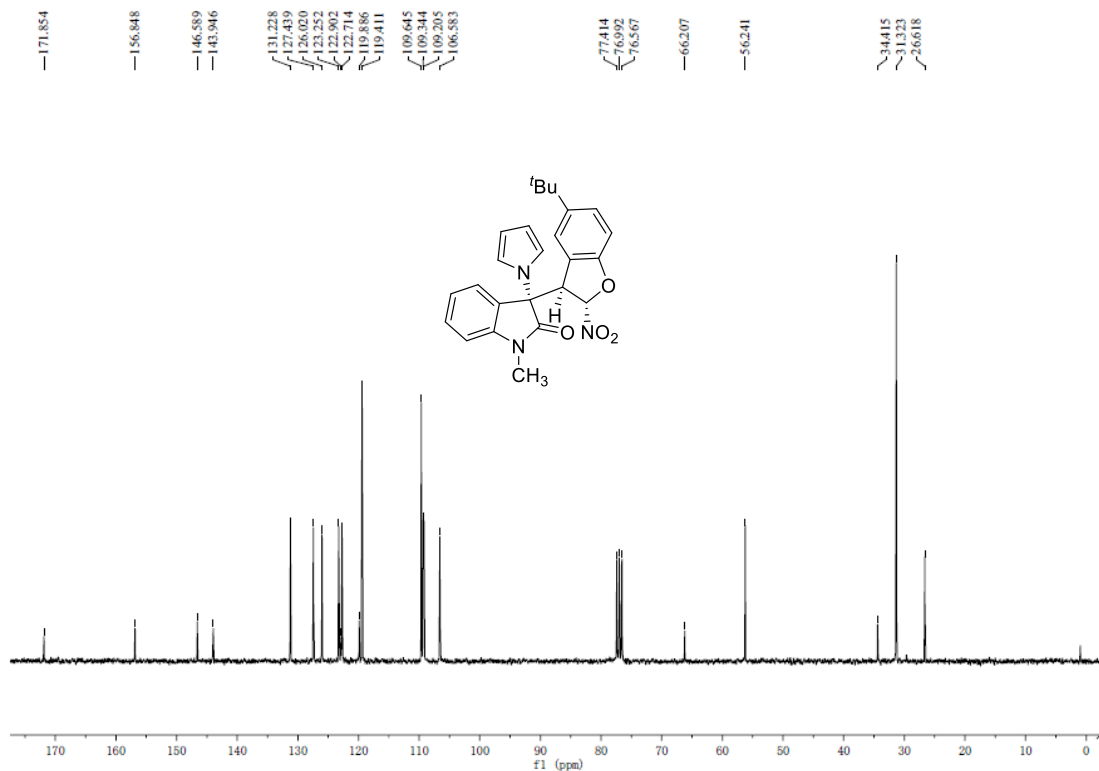

### HPLC of 3l

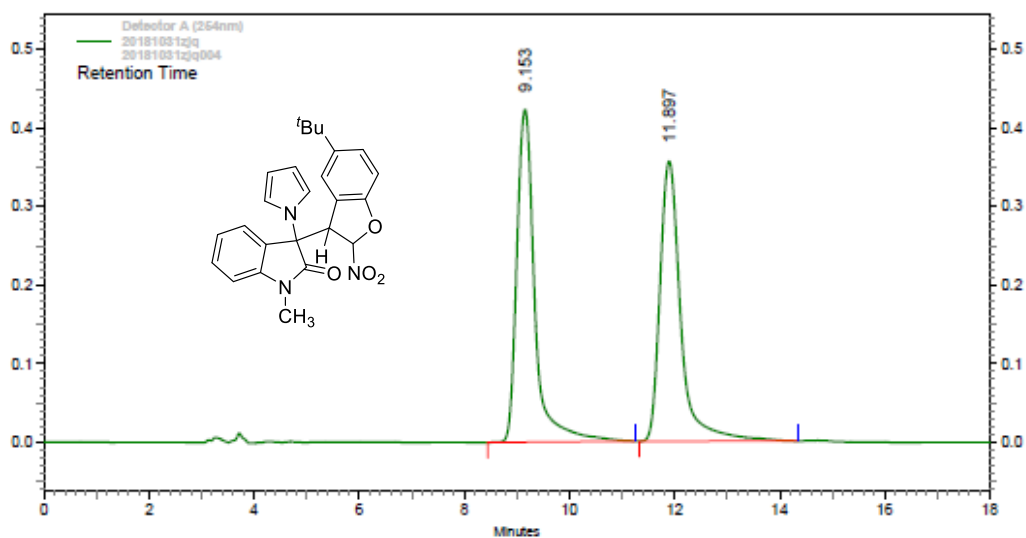

**Detector A (254nm)**

| Pk # | Retention Time | Height | Height Percent | Area     | Area Percent |
|------|----------------|--------|----------------|----------|--------------|
| 1    | 9.153          | 423523 | 54.29          | 10097611 | 50.74        |
| 2    | 11.897         | 356535 | 45.71          | 9804774  | 49.26        |

|               |  |        |        |          |        |
|---------------|--|--------|--------|----------|--------|
| <b>Totals</b> |  | 780058 | 100.00 | 19902385 | 100.00 |
|---------------|--|--------|--------|----------|--------|

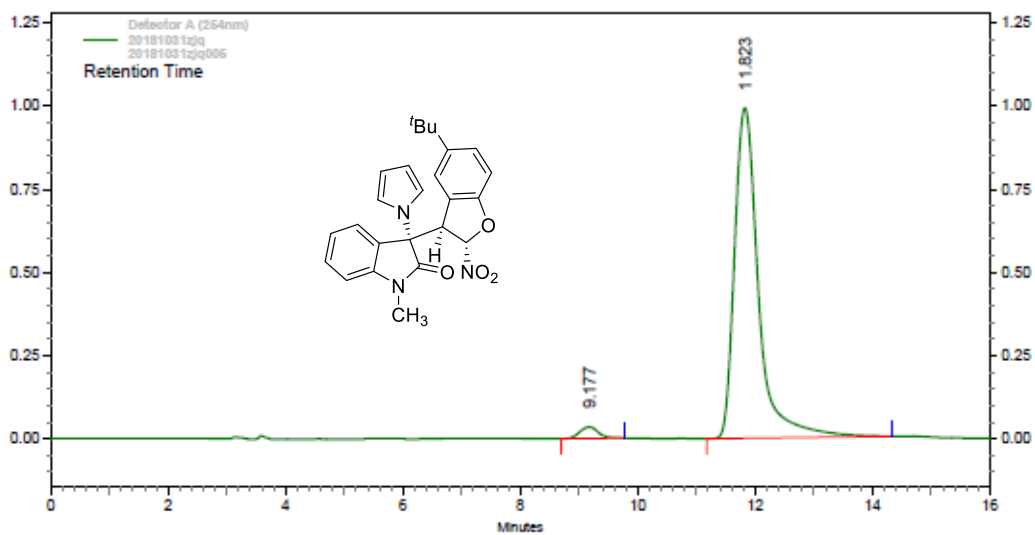

**Detector A (254nm)**

| Pk # | Retention Time | Height | Height Percent | Area     | Area Percent |
|------|----------------|--------|----------------|----------|--------------|
| 1    | 9.177          | 34742  | 3.38           | 765440   | 2.65         |
| 2    | 11.823         | 992645 | 96.62          | 28173253 | 97.35        |

|               |  |         |        |          |        |
|---------------|--|---------|--------|----------|--------|
| <b>Totals</b> |  | 1027387 | 100.00 | 28938693 | 100.00 |
|---------------|--|---------|--------|----------|--------|

<sup>1</sup>H and <sup>13</sup>C NMR of **3m**

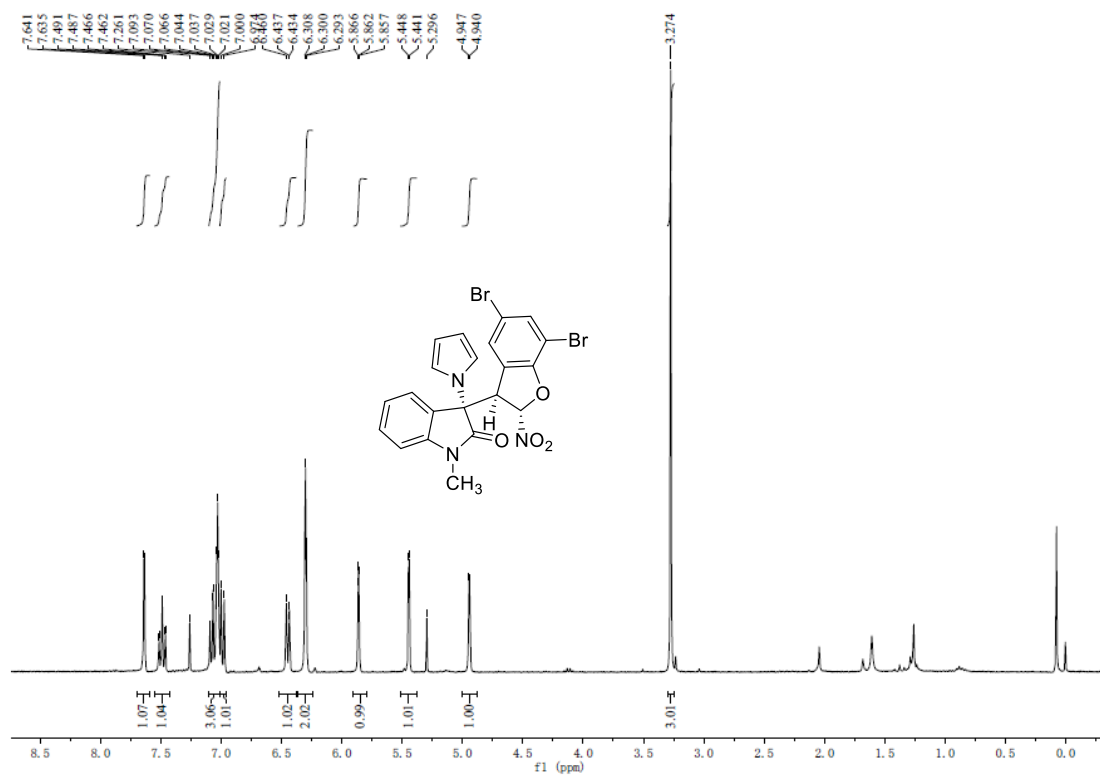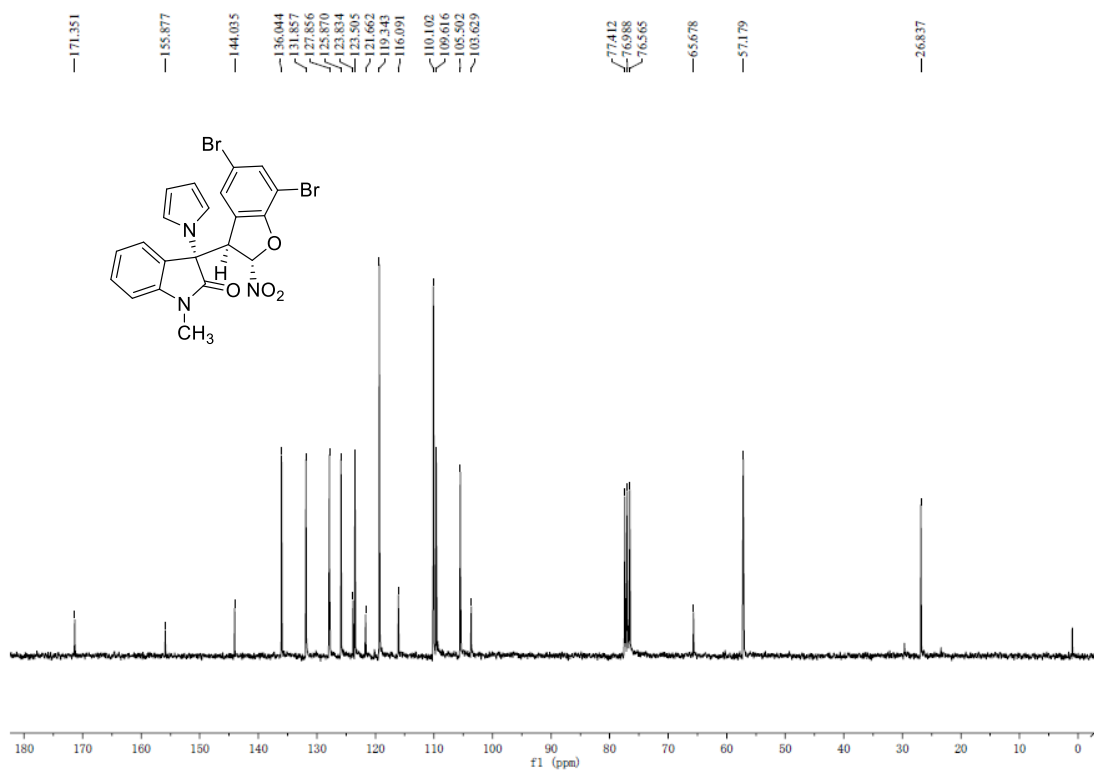

### HPLC of 3m

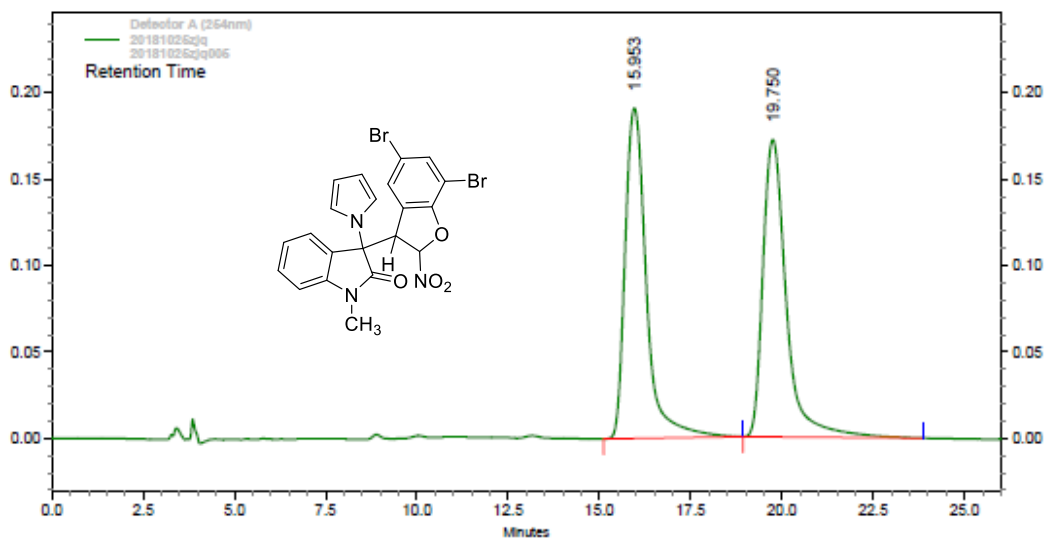

| Detector A (254nm) | PK # | Retention Time | Height | Height Percent | Area    | Area Percent |
|--------------------|------|----------------|--------|----------------|---------|--------------|
|                    | 1    | 15.953         | 191085 | 52.63          | 7732461 | 50.21        |
|                    | 2    | 19.750         | 171974 | 47.37          | 7667594 | 49.79        |

| Totals | Height | Height Percent | Area     | Area Percent |
|--------|--------|----------------|----------|--------------|
|        | 363059 | 100.00         | 15400055 | 100.00       |

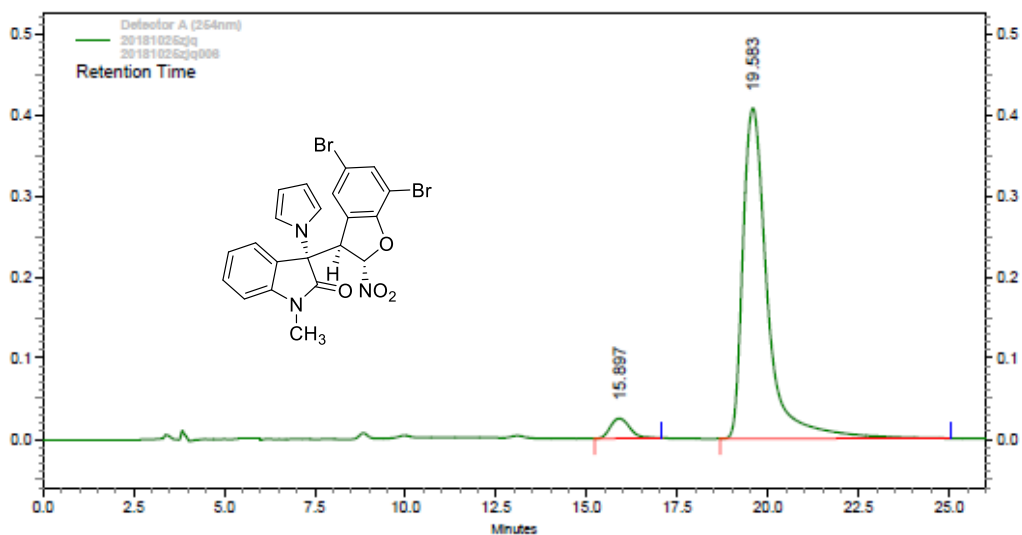

| Detector A (254nm) | PK # | Retention Time | Height | Height Percent | Area     | Area Percent |
|--------------------|------|----------------|--------|----------------|----------|--------------|
|                    | 1    | 15.897         | 24614  | 5.70           | 921624   | 4.57         |
|                    | 2    | 19.583         | 407407 | 94.30          | 19247986 | 95.43        |

| Totals | Height | Height Percent | Area     | Area Percent |
|--------|--------|----------------|----------|--------------|
|        | 432021 | 100.00         | 20169610 | 100.00       |

<sup>1</sup>H and <sup>13</sup>C NMR of **3n**

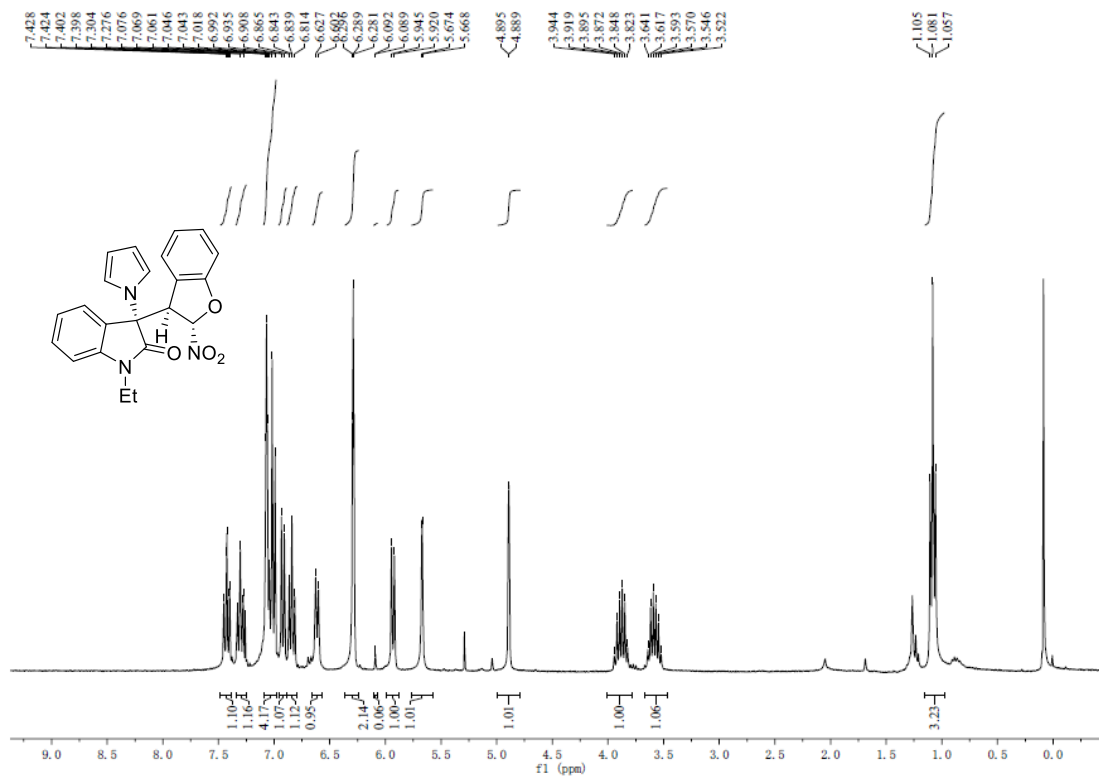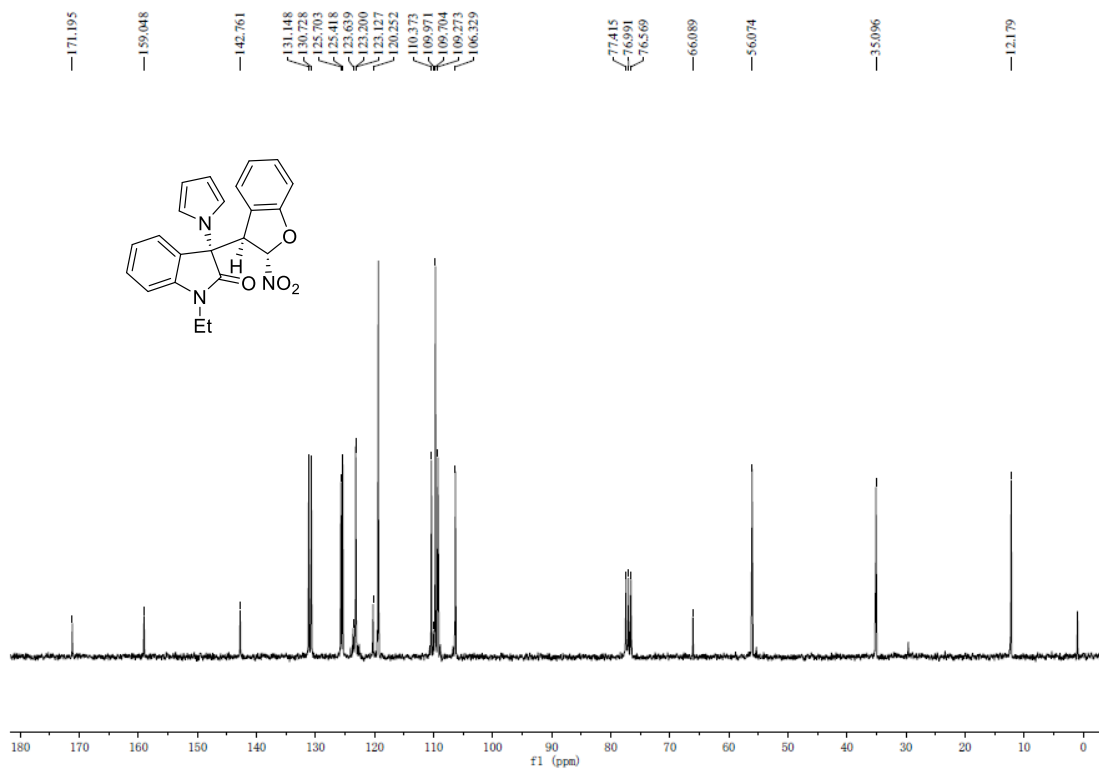



### HPLC of 3n

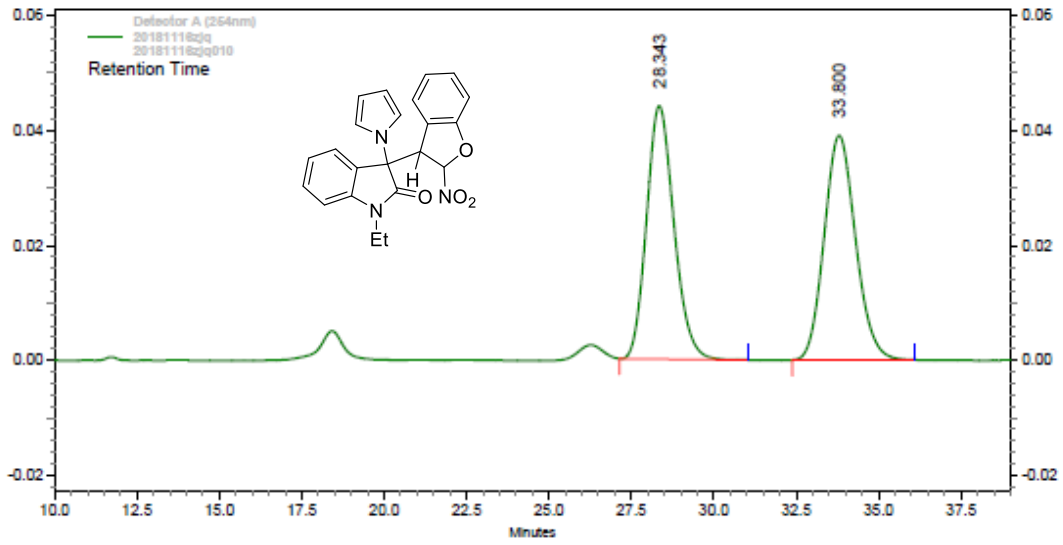

| Detector A (254nm) |                |        |                |         |              |
|--------------------|----------------|--------|----------------|---------|--------------|
| Pk #               | Retention Time | Height | Height Percent | Area    | Area Percent |
| 1                  | 28.343         | 44077  | 53.00          | 2553860 | 49.65        |
| 2                  | 33.800         | 39081  | 47.00          | 2589583 | 50.35        |
| <b>Totals</b>      |                | 83158  | 100.00         | 5143443 | 100.00       |

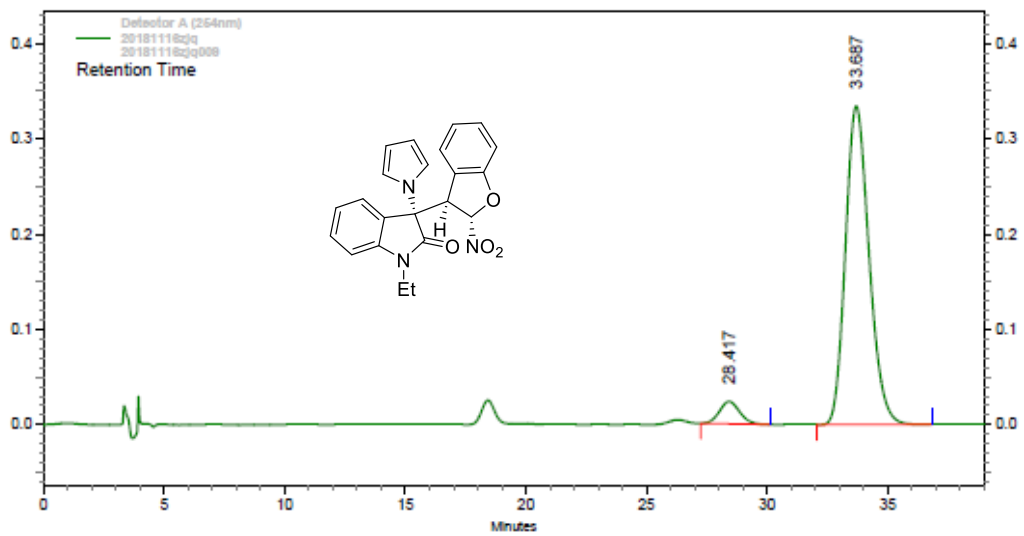

| Detector A (254nm) |                |        |                |          |              |
|--------------------|----------------|--------|----------------|----------|--------------|
| Pk #               | Retention Time | Height | Height Percent | Area     | Area Percent |
| 1                  | 28.417         | 23471  | 6.56           | 1370459  | 5.68         |
| 2                  | 33.687         | 334246 | 93.44          | 22761653 | 94.32        |
| <b>Totals</b>      |                | 357717 | 100.00         | 24132112 | 100.00       |

# $^1\text{H}$ and $^{13}\text{C}$ NMR of **30**

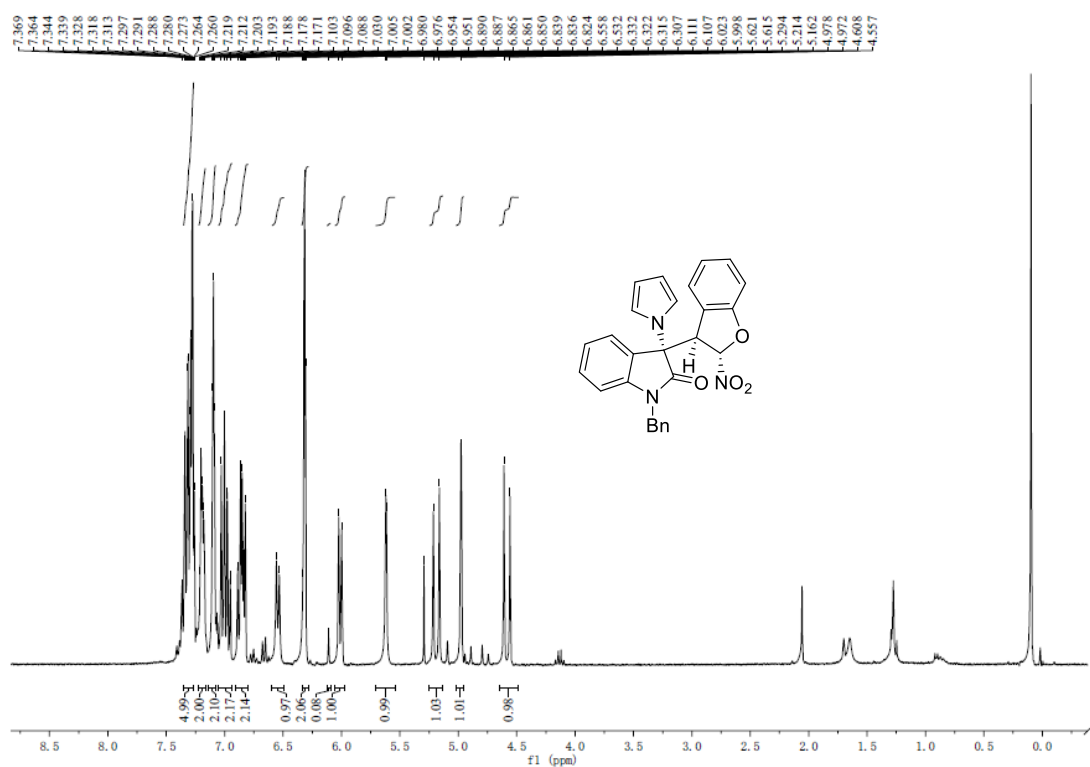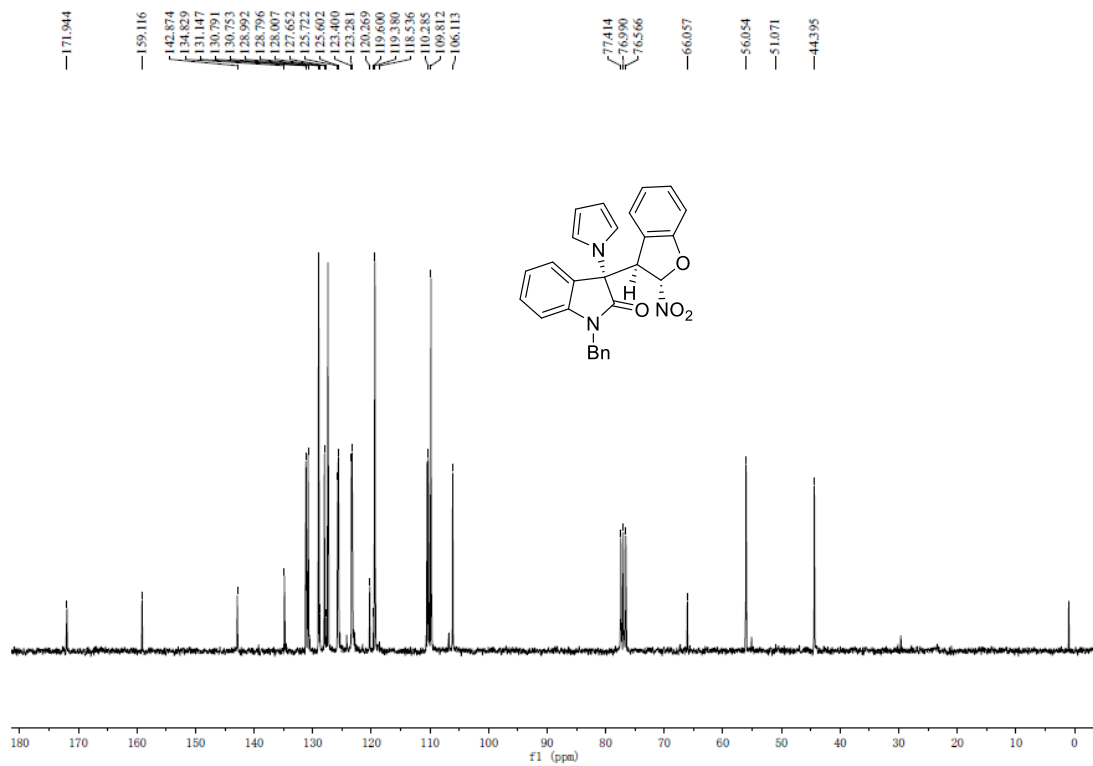

### HPLC of 3o

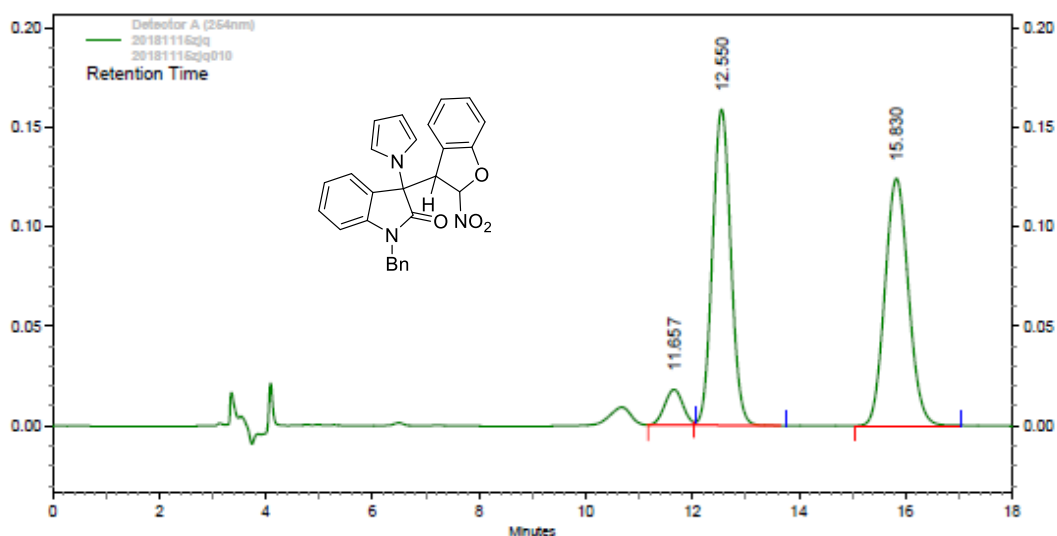

Detector  
A (254nm)

| PK # | Retention Time | Height | Height Percent | Area    | Area Percent |
|------|----------------|--------|----------------|---------|--------------|
| 1    | 11.657         | 17834  | 5.93           | 426408  | 5.31         |
| 2    | 12.550         | 158654 | 52.79          | 3800220 | 47.28        |
| 3    | 15.830         | 124067 | 41.28          | 3810451 | 47.41        |

| Totals |  | 300555 | 100.00 | 8037079 | 100.00 |
|--------|--|--------|--------|---------|--------|
|--------|--|--------|--------|---------|--------|

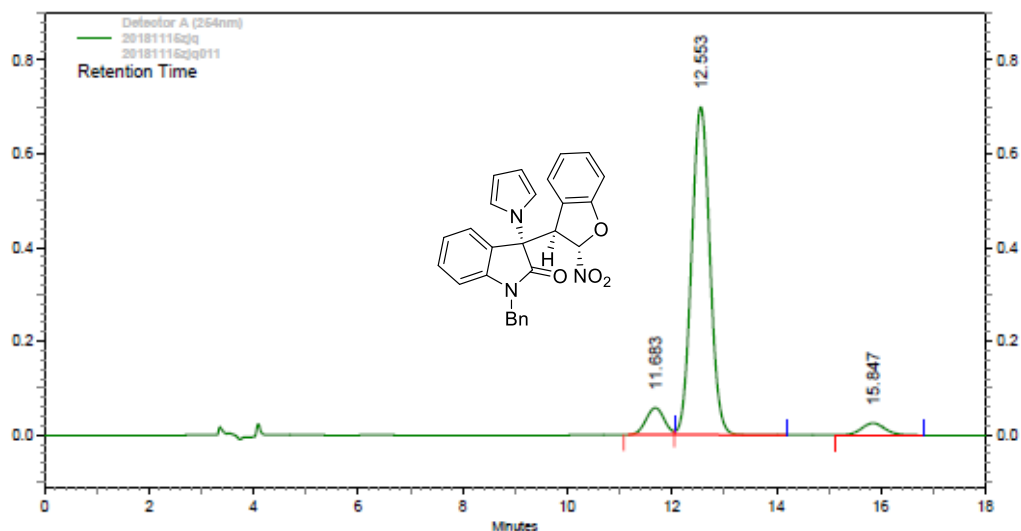

Detector  
A (254nm)

| PK # | Retention Time | Height | Height Percent | Area     | Area Percent |
|------|----------------|--------|----------------|----------|--------------|
| 1    | 11.683         | 57399  | 7.34           | 1398149  | 7.30         |
| 2    | 12.553         | 699419 | 89.45          | 16985208 | 88.67        |
| 3    | 15.847         | 25133  | 3.21           | 771108   | 4.03         |

| Totals |  | 781951 | 100.00 | 19154465 | 100.00 |
|--------|--|--------|--------|----------|--------|
|--------|--|--------|--------|----------|--------|

# <sup>1</sup>H and <sup>13</sup>C NMR of 3p

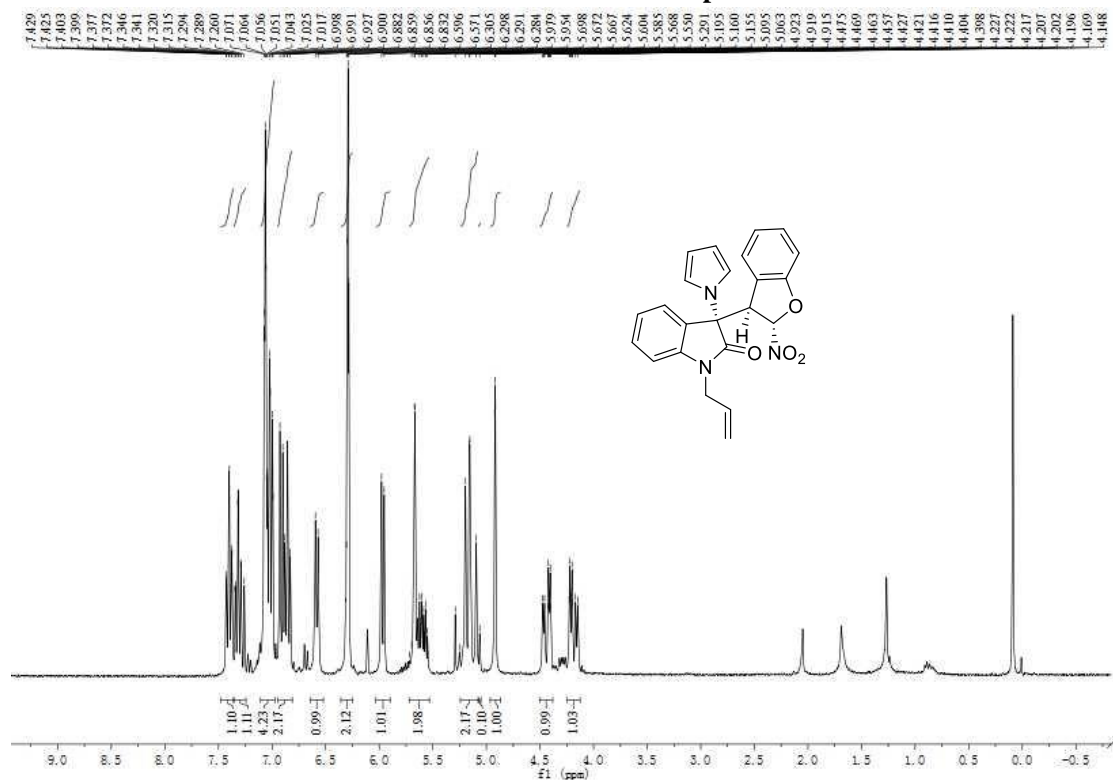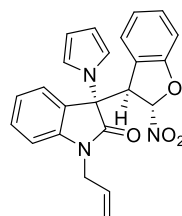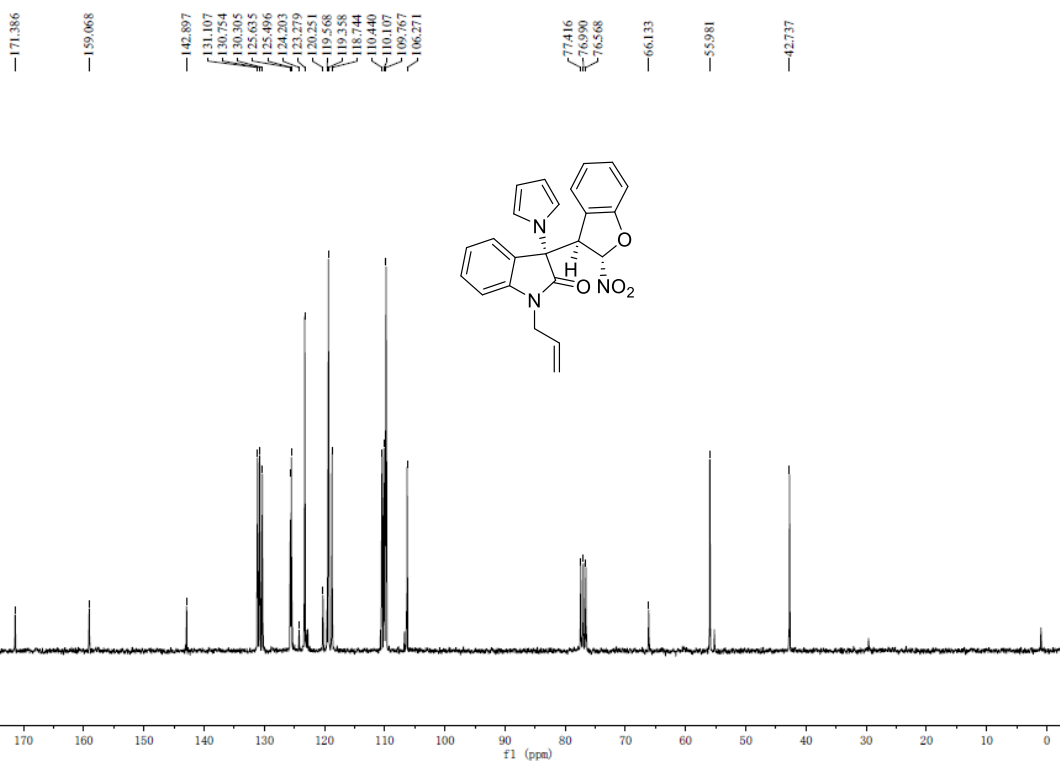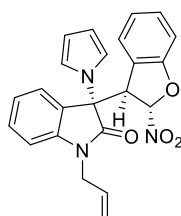

### HPLC of 3p

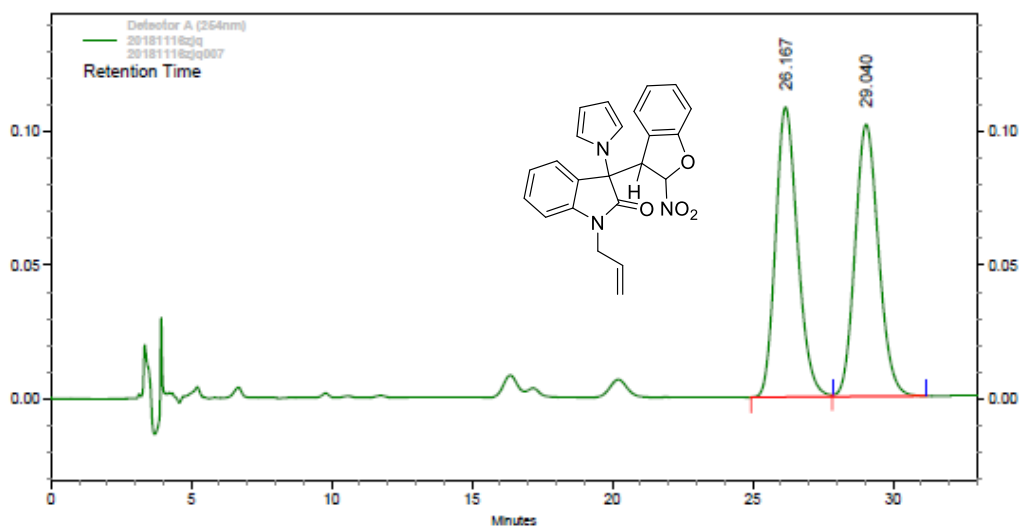

| Detector A (254nm) |                |        |                |          |              |
|--------------------|----------------|--------|----------------|----------|--------------|
| Pk #               | Retention Time | Height | Height Percent | Area     | Area Percent |
| 1                  | 26.167         | 108318 | 51.59          | 5915585  | 49.97        |
| 2                  | 29.040         | 101633 | 48.41          | 5923586  | 50.03        |
| Totals             |                | 209951 | 100.00         | 11839171 | 100.00       |

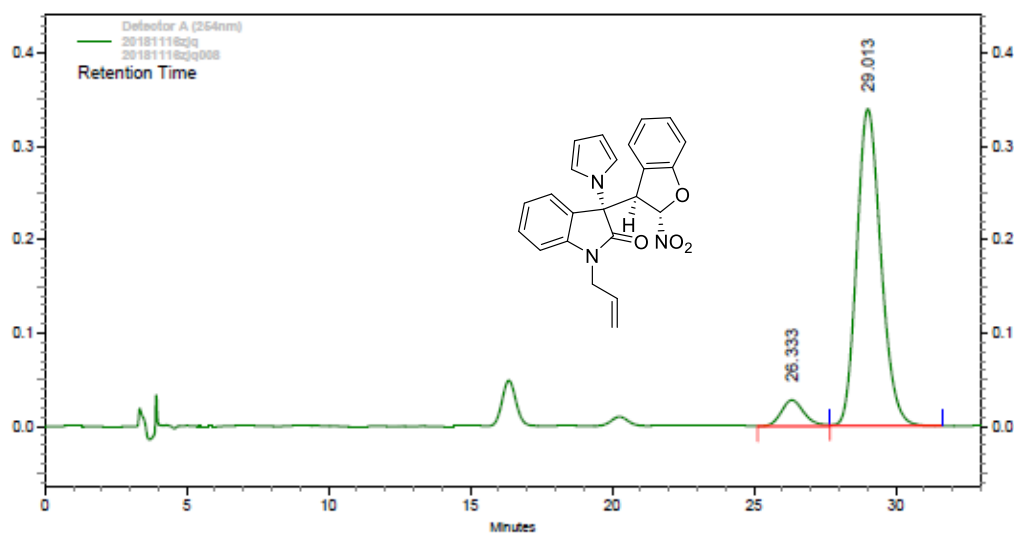

| Detector A (254nm) |                |        |                |          |              |
|--------------------|----------------|--------|----------------|----------|--------------|
| Pk #               | Retention Time | Height | Height Percent | Area     | Area Percent |
| 1                  | 26.333         | 27833  | 7.57           | 1547181  | 7.14         |
| 2                  | 29.013         | 339613 | 92.43          | 20126573 | 92.86        |
| Totals             |                | 367446 | 100.00         | 21673754 | 100.00       |

# $^1\text{H}$ and $^{13}\text{C}$ NMR of **3q**

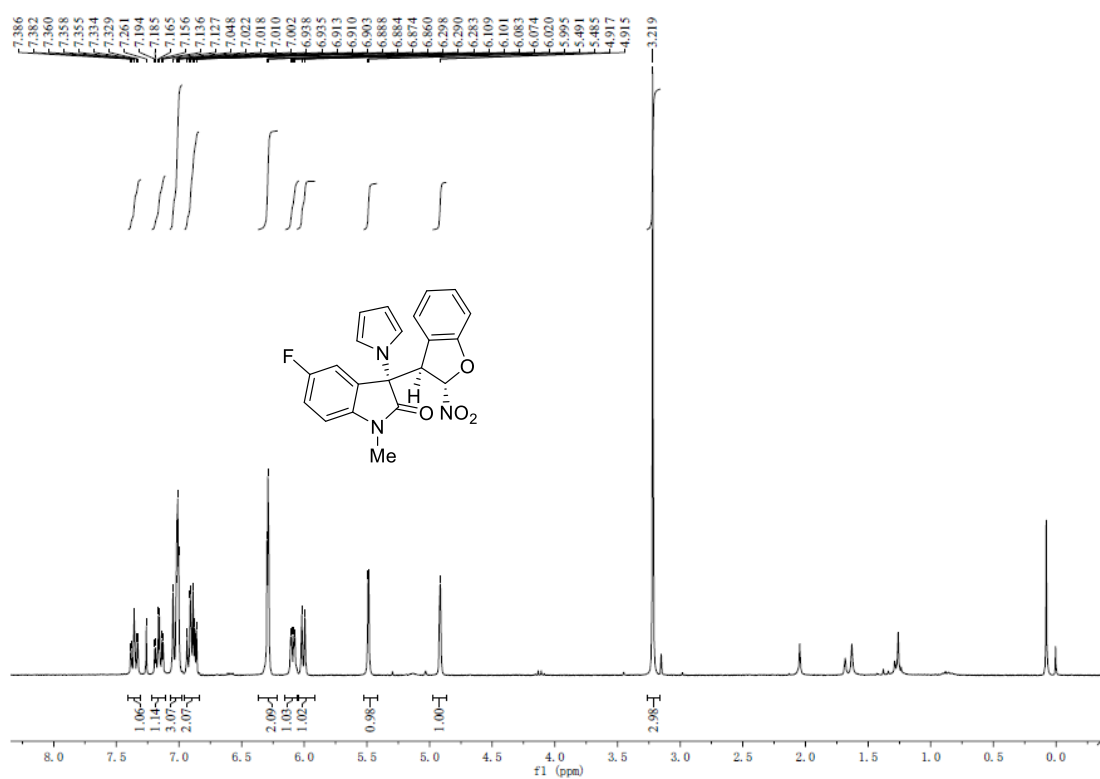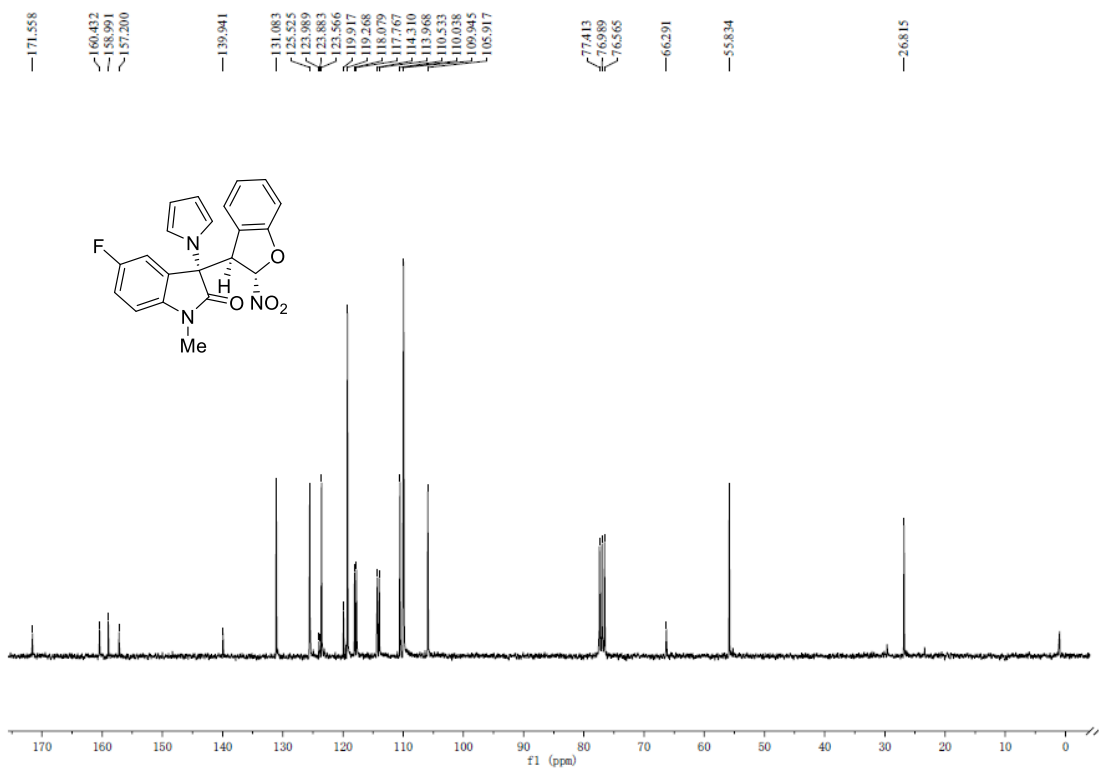

### HPLC of 3q

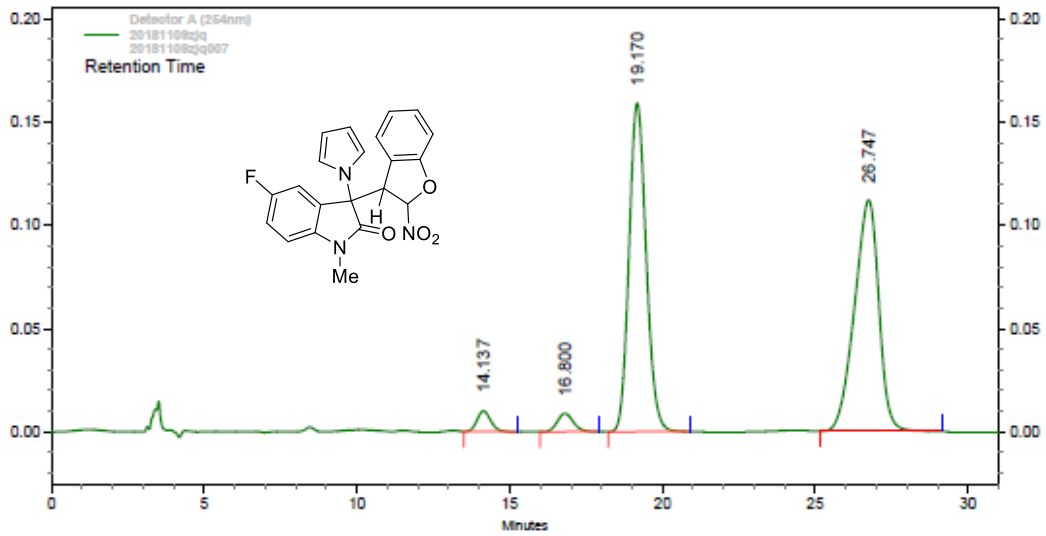

| Detector A (254nm) |                |        |                |          |              |
|--------------------|----------------|--------|----------------|----------|--------------|
| Pk #               | Retention Time | Height | Height Percent | Area     | Area Percent |
| 1                  | 14.137         | 9902   | 3.42           | 305260   | 2.35         |
| 2                  | 16.800         | 8787   | 3.03           | 316865   | 2.43         |
| 3                  | 19.170         | 158956 | 54.90          | 6200399  | 47.64        |
| 4                  | 26.747         | 111880 | 38.64          | 6192809  | 47.58        |
| Totals             |                | 289525 | 100.00         | 13015333 | 100.00       |

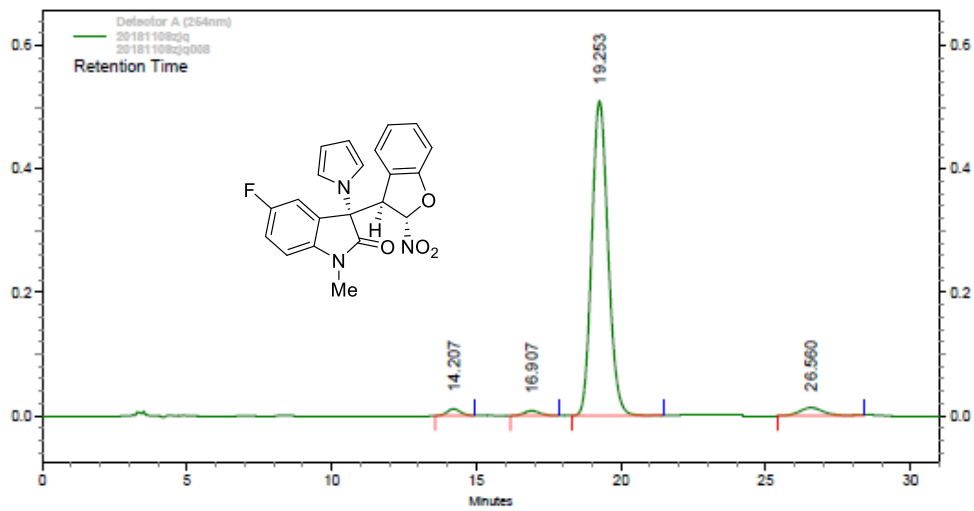

| Detector A (254nm) |                |        |                |          |              |
|--------------------|----------------|--------|----------------|----------|--------------|
| Pk #               | Retention Time | Height | Height Percent | Area     | Area Percent |
| 1                  | 14.207         | 10845  | 2.00           | 334073   | 1.57         |
| 2                  | 16.907         | 7684   | 1.42           | 281256   | 1.33         |
| 3                  | 19.253         | 509977 | 94.22          | 19899544 | 93.78        |
| 4                  | 26.560         | 12767  | 2.36           | 703691   | 3.32         |
| Totals             |                | 541273 | 100.00         | 21218564 | 100.00       |

<sup>1</sup>H and <sup>13</sup>C NMR of 3r

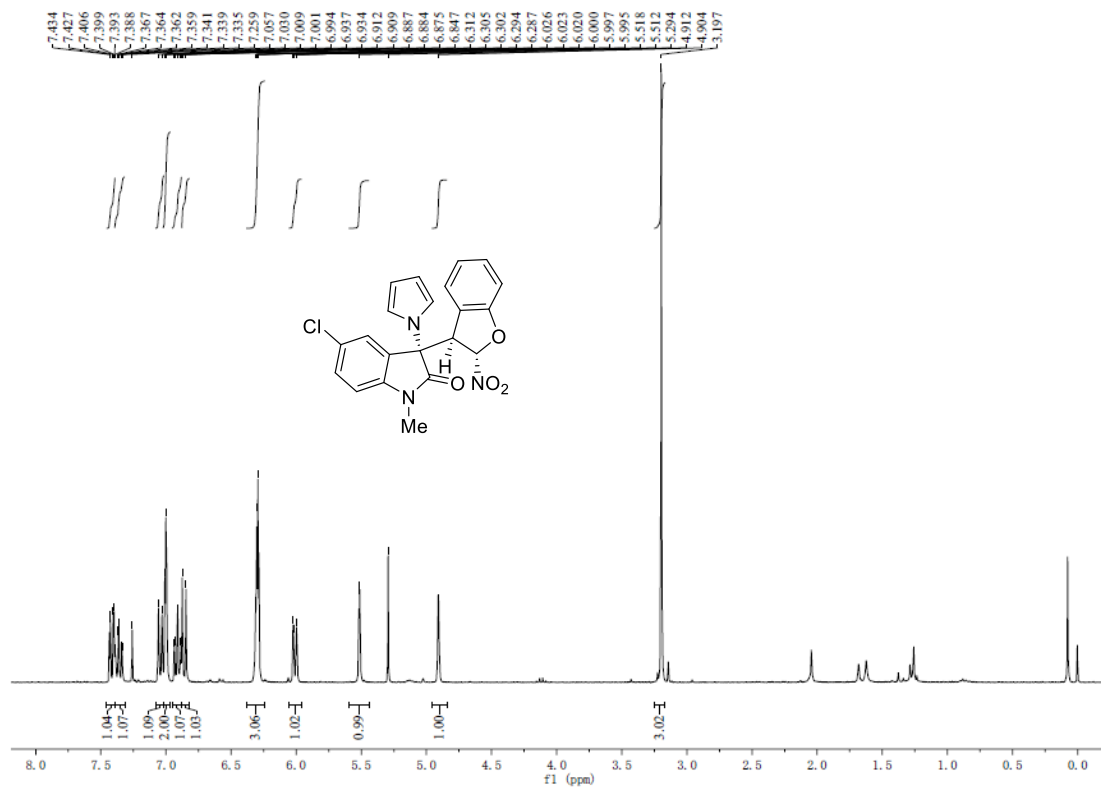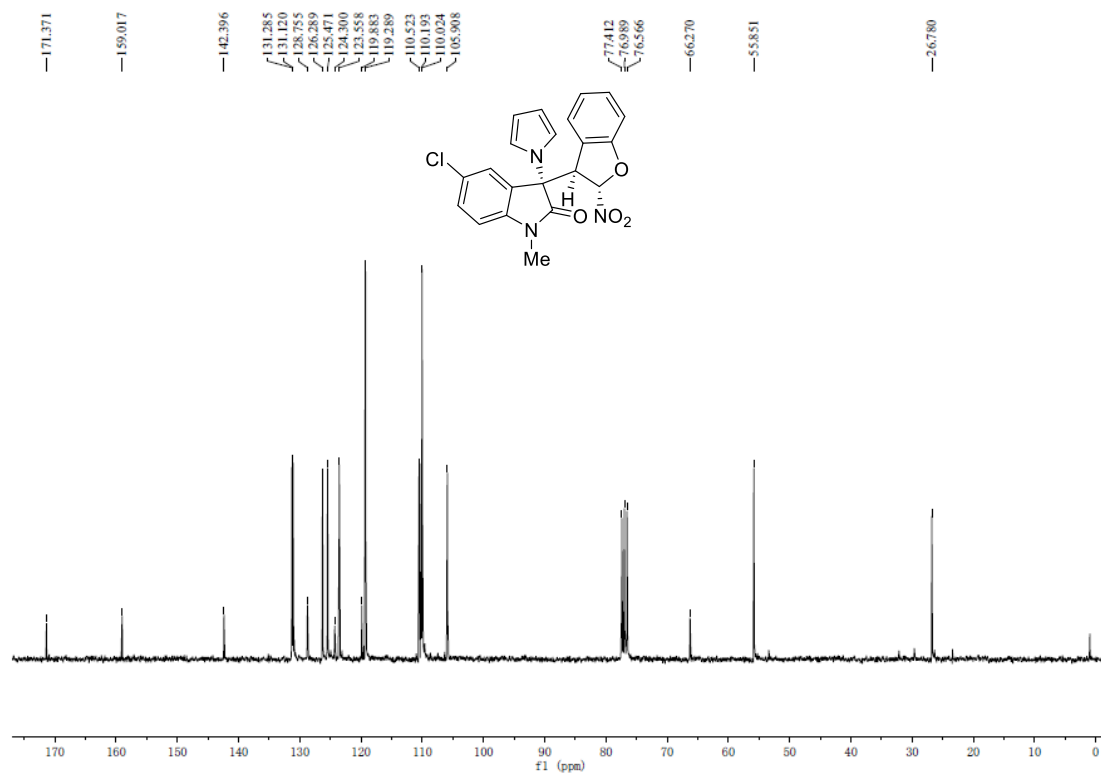



### HPLC of 3r

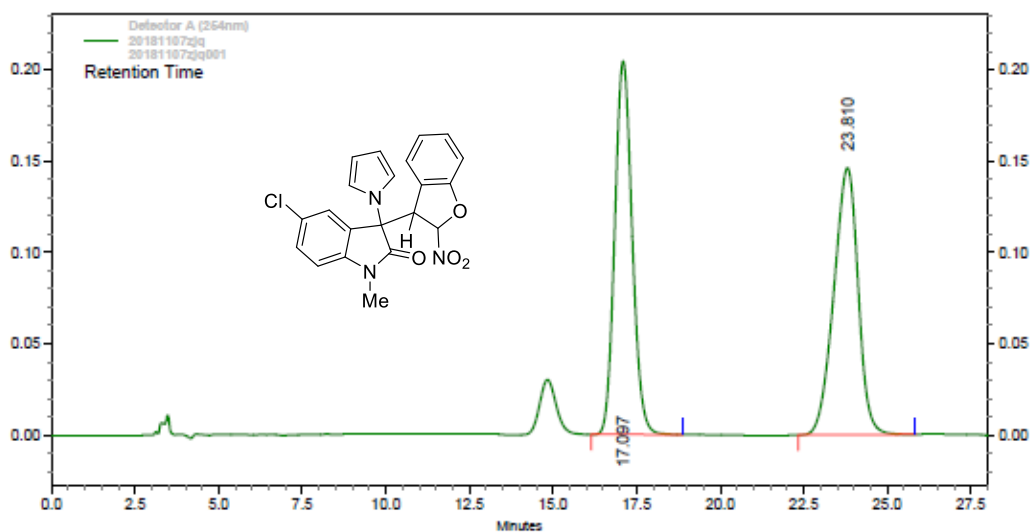

Detector  
A (254nm)

| Pk # | Retention Time | Height | Height Percent | Area    | Area Percent |
|------|----------------|--------|----------------|---------|--------------|
| 1    | 17.097         | 204413 | 58.30          | 7406749 | 50.04        |
| 2    | 23.810         | 146185 | 41.70          | 7395857 | 49.96        |

| Totals |  | 350598 | 100.00 | 14802606 | 100.00 |
|--------|--|--------|--------|----------|--------|
|--------|--|--------|--------|----------|--------|

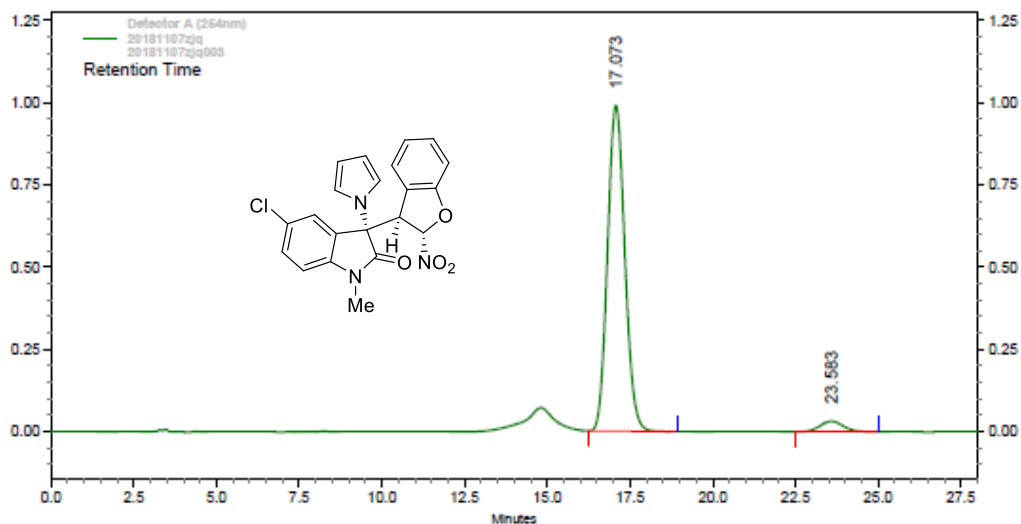

Detector  
A (254nm)

| Pk # | Retention Time | Height | Height Percent | Area     | Area Percent |
|------|----------------|--------|----------------|----------|--------------|
| 1    | 17.073         | 990277 | 96.86          | 35970524 | 95.76        |
| 2    | 23.583         | 32107  | 3.14           | 1591970  | 4.24         |

| Totals |  | 1022384 | 100.00 | 37562494 | 100.00 |
|--------|--|---------|--------|----------|--------|
|--------|--|---------|--------|----------|--------|

$^1\text{H}$  and  $^{13}\text{C}$  NMR of **3s**

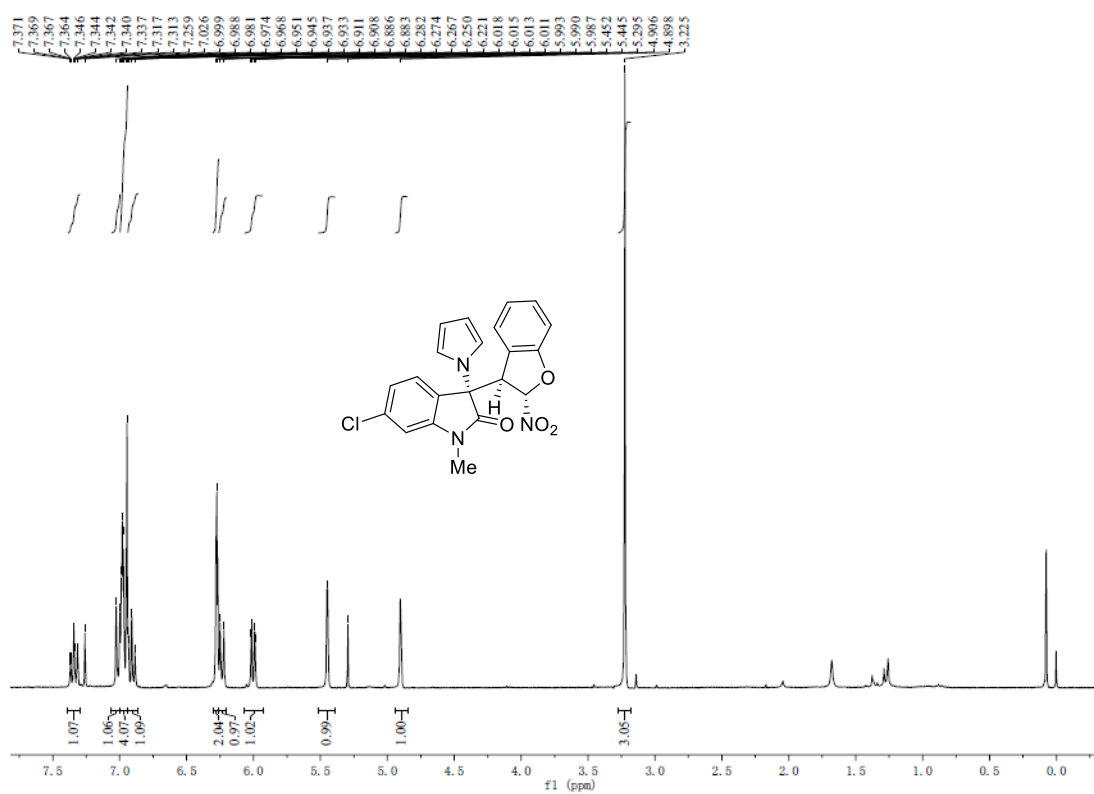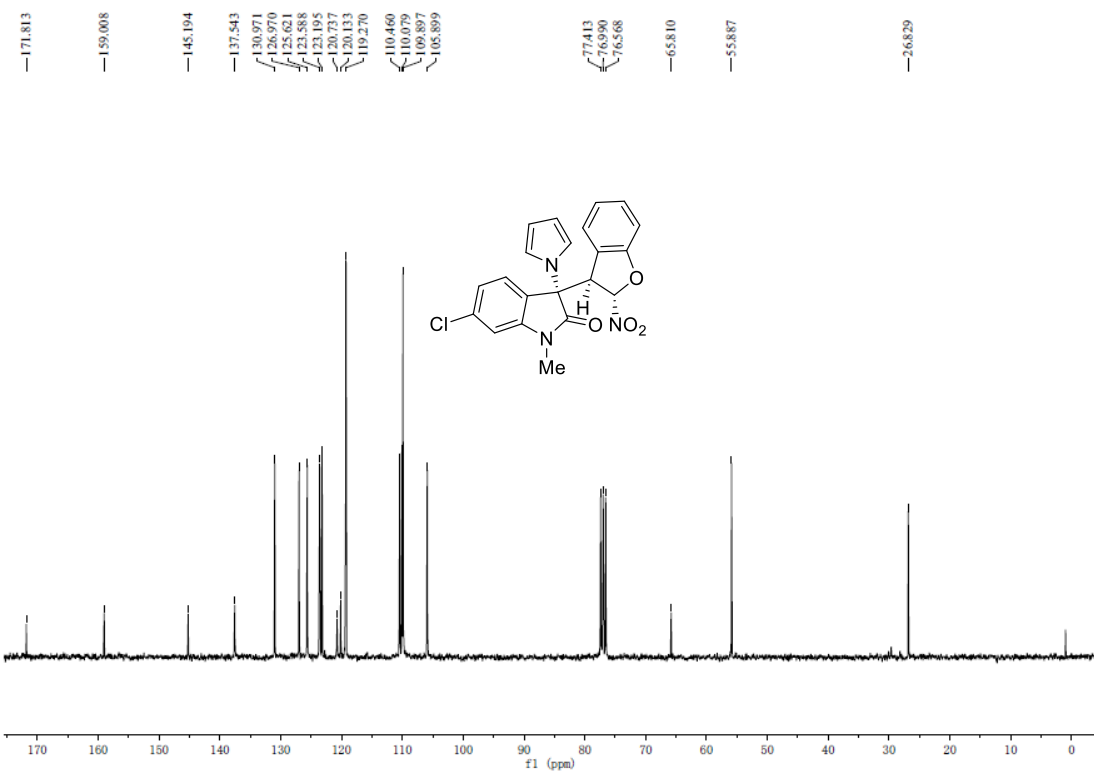

### HPLC of 3s

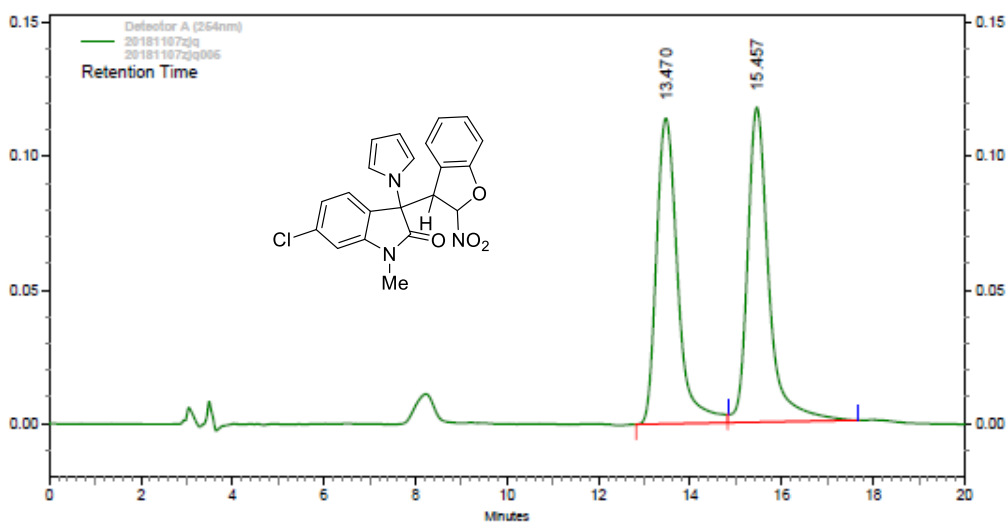

| PK # | Retention Time | Height | Height Percent | Area    | Area Percent |
|------|----------------|--------|----------------|---------|--------------|
| 1    | 13.470         | 114319 | 49.26          | 3692582 | 49.31        |
| 2    | 15.457         | 117740 | 50.74          | 3795573 | 50.69        |

| Totals | Height | Height Percent | Area    | Area Percent |
|--------|--------|----------------|---------|--------------|
|        | 232059 | 100.00         | 7488155 | 100.00       |

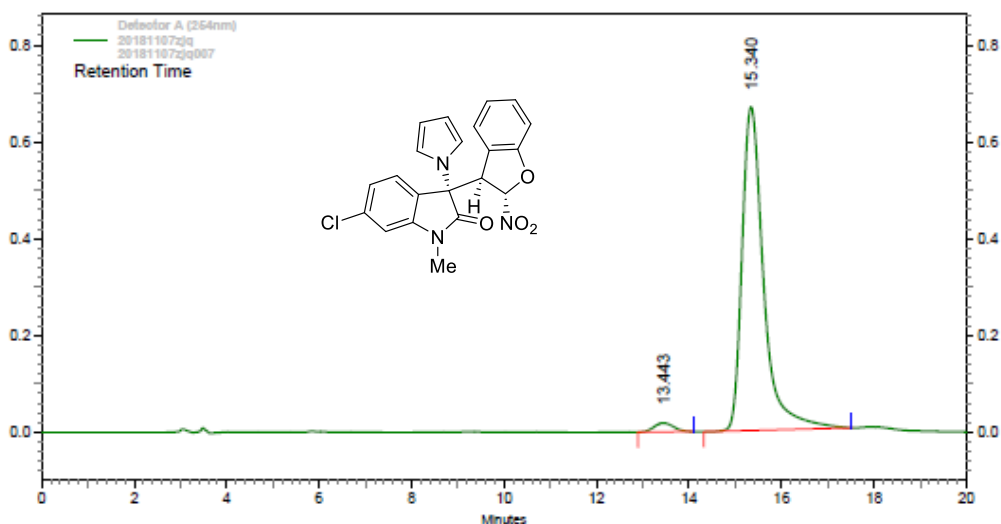

| PK # | Retention Time | Height | Height Percent | Area     | Area Percent |
|------|----------------|--------|----------------|----------|--------------|
| 1    | 13.443         | 18230  | 2.65           | 534228   | 2.40         |
| 2    | 15.340         | 668763 | 97.35          | 21736443 | 97.60        |

| Totals | Height | Height Percent | Area     | Area Percent |
|--------|--------|----------------|----------|--------------|
|        | 686993 | 100.00         | 22270671 | 100.00       |

$^1\text{H}$  and  $^{13}\text{C}$  NMR of **3t**

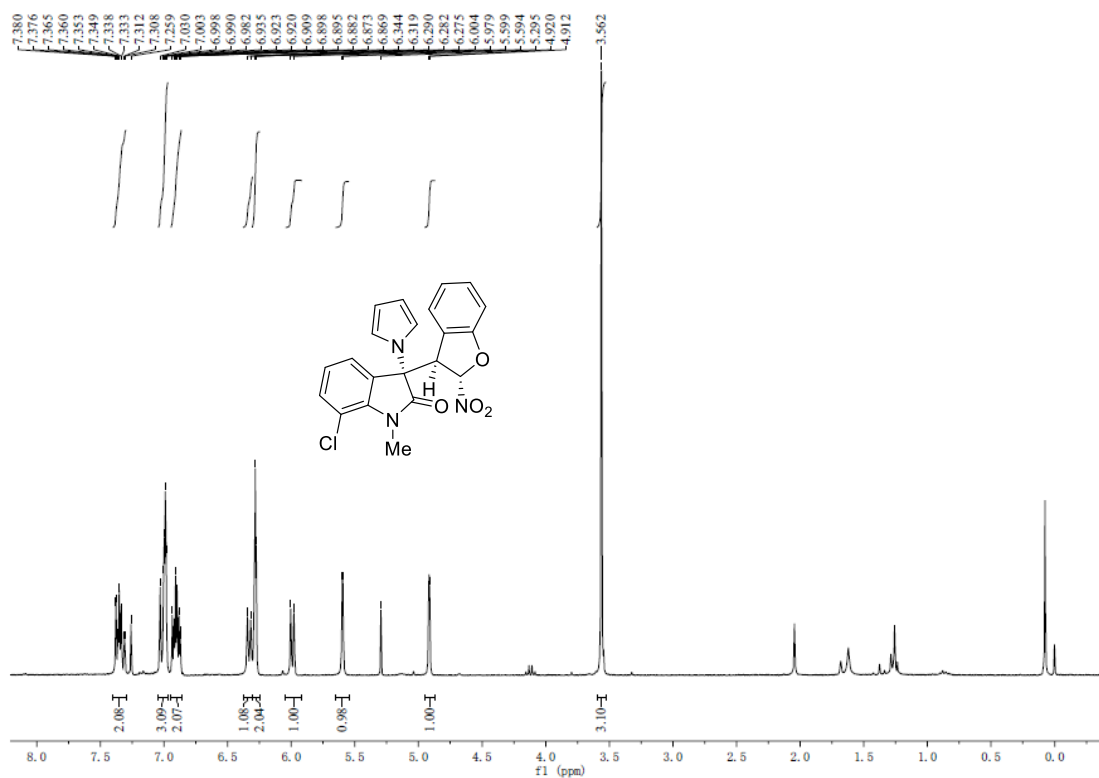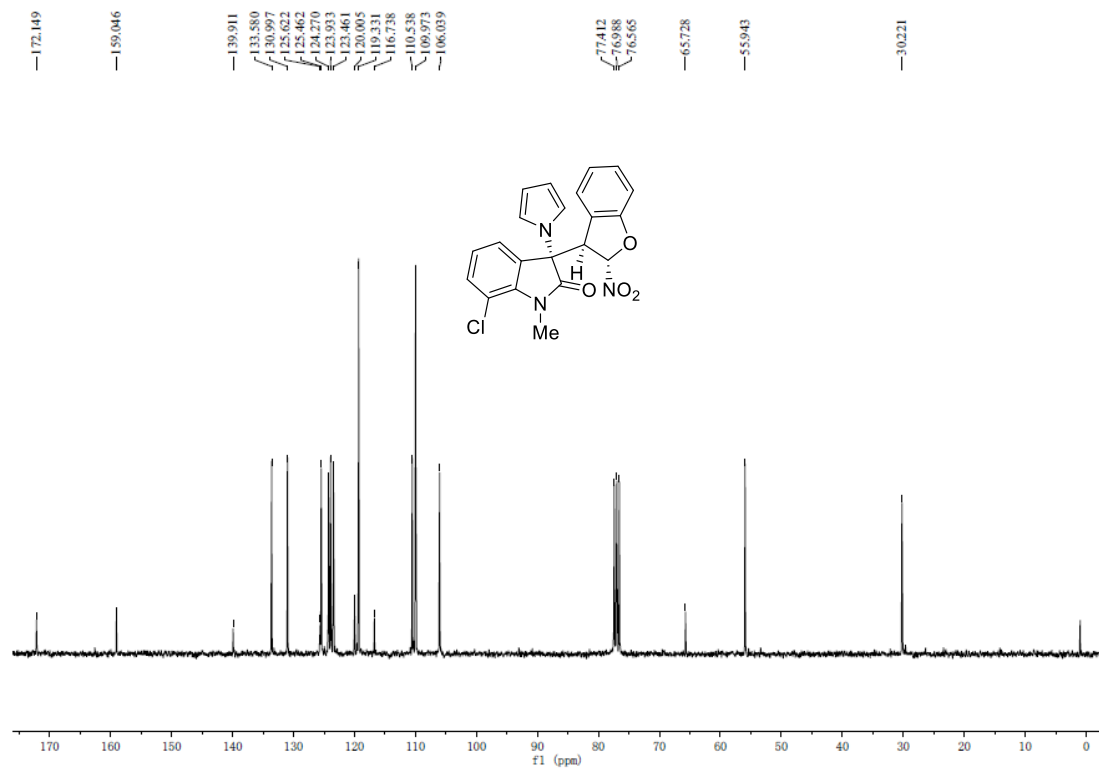

### HPLC of 3t

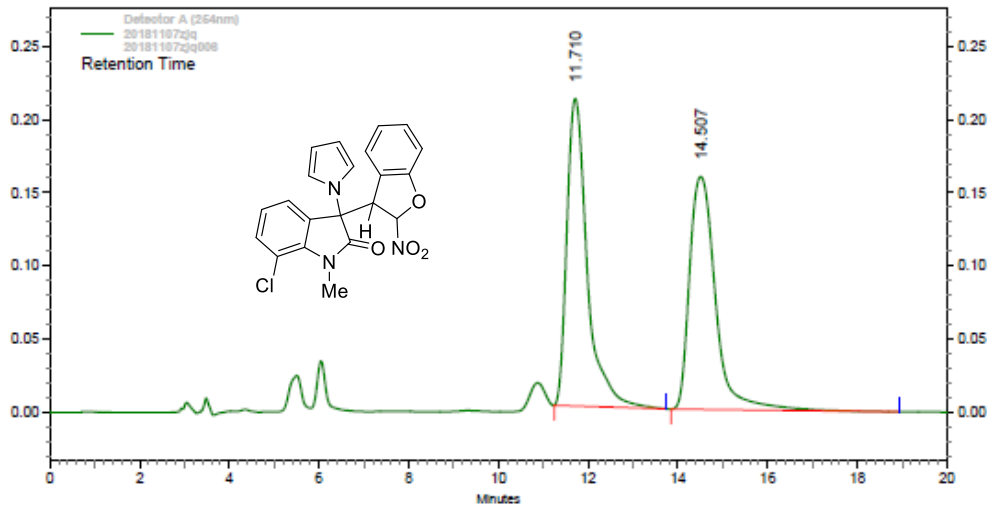

Detector A (254nm)

| Pk #          | Retention Time | Height | Height Percent | Area     | Area Percent |
|---------------|----------------|--------|----------------|----------|--------------|
| 1             | 11.710         | 210278 | 56.91          | 6631471  | 50.84        |
| 2             | 14.507         | 159246 | 43.09          | 6412549  | 49.16        |
| <b>Totals</b> |                | 369524 | 100.00         | 13044020 | 100.00       |

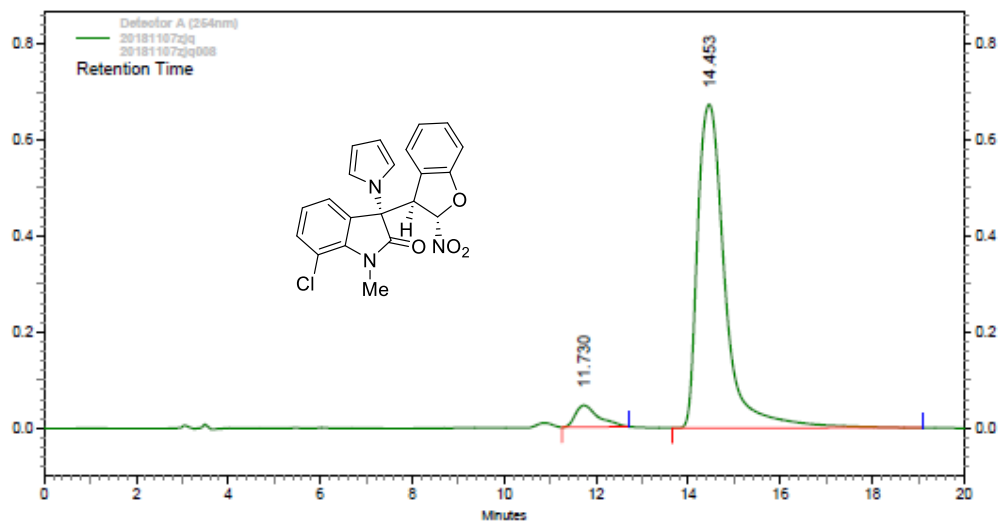

Detector A (254nm)

| Pk #          | Retention Time | Height | Height Percent | Area     | Area Percent |
|---------------|----------------|--------|----------------|----------|--------------|
| 1             | 11.730         | 45090  | 6.28           | 1571833  | 5.35         |
| 2             | 14.453         | 672963 | 93.72          | 27804589 | 94.65        |
| <b>Totals</b> |                | 718053 | 100.00         | 29376422 | 100.00       |

$^1\text{H}$  and  $^{13}\text{C}$  NMR of **3u**

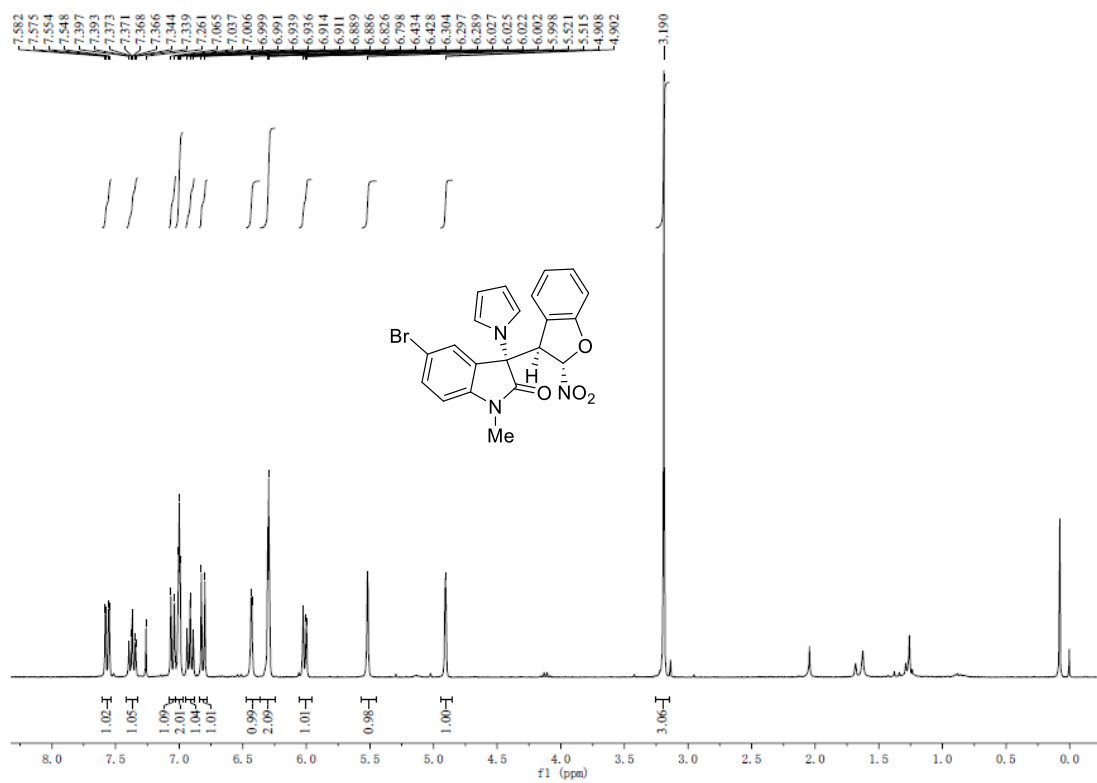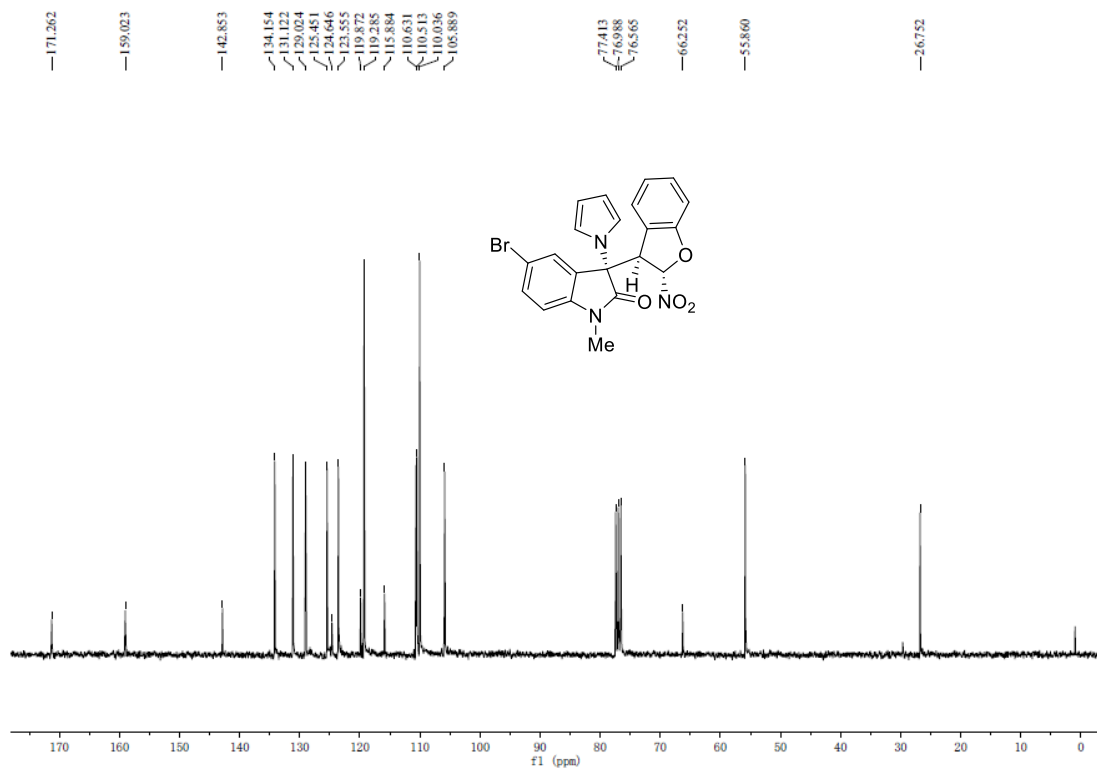

### HPLC of 3u

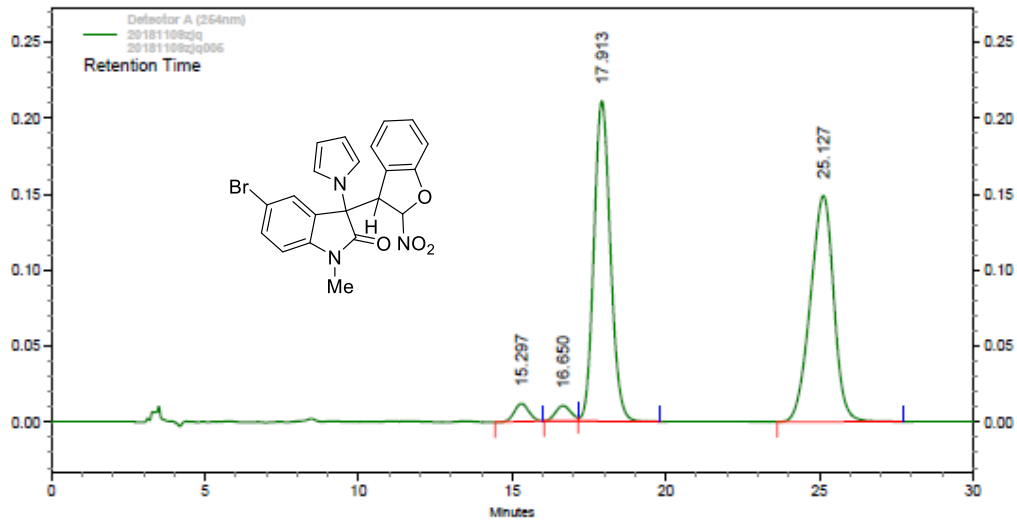

| Detector A (254nm) | Pk # | Retention Time | Height | Height Percent | Area    | Area Percent |
|--------------------|------|----------------|--------|----------------|---------|--------------|
|                    | 1    | 15.297         | 11803  | 3.09           | 386952  | 2.34         |
|                    | 2    | 16.650         | 10111  | 2.65           | 355473  | 2.15         |
|                    | 3    | 17.913         | 210791 | 55.25          | 7873439 | 47.70        |
|                    | 4    | 25.127         | 148804 | 39.00          | 7890073 | 47.80        |

| Totals |  |  |        |        |          |        |
|--------|--|--|--------|--------|----------|--------|
|        |  |  | 381509 | 100.00 | 16505937 | 100.00 |

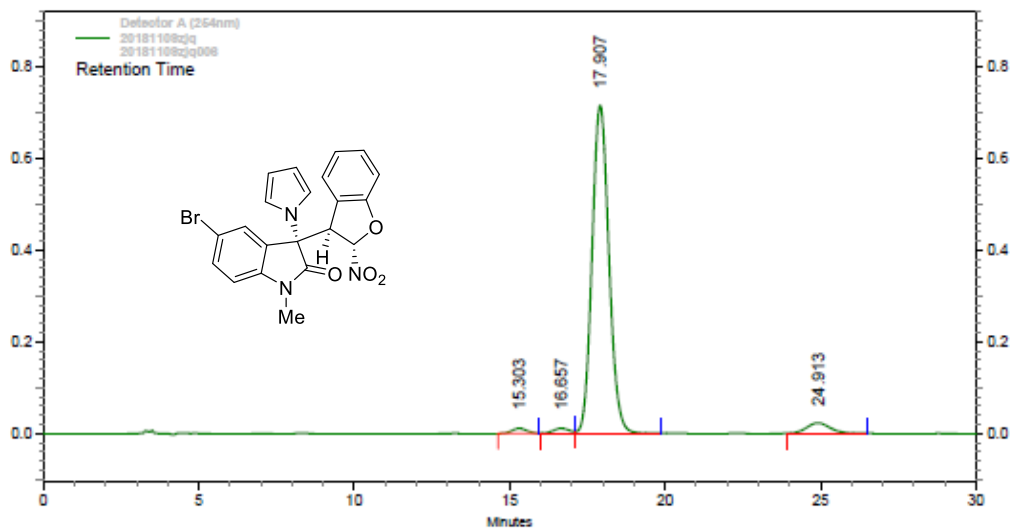

| Detector A (254nm) | Pk # | Retention Time | Height | Height Percent | Area     | Area Percent |
|--------------------|------|----------------|--------|----------------|----------|--------------|
|                    | 1    | 15.303         | 10712  | 1.41           | 347173   | 1.21         |
|                    | 2    | 16.657         | 10615  | 1.40           | 367877   | 1.28         |
|                    | 3    | 17.907         | 714971 | 94.20          | 26905020 | 93.40        |
|                    | 4    | 24.913         | 22699  | 2.99           | 1186539  | 4.12         |

| Totals |  |  |        |        |          |        |
|--------|--|--|--------|--------|----------|--------|
|        |  |  | 758997 | 100.00 | 28806609 | 100.00 |

$^1\text{H}$  and  $^{13}\text{C}$  NMR of **3v**

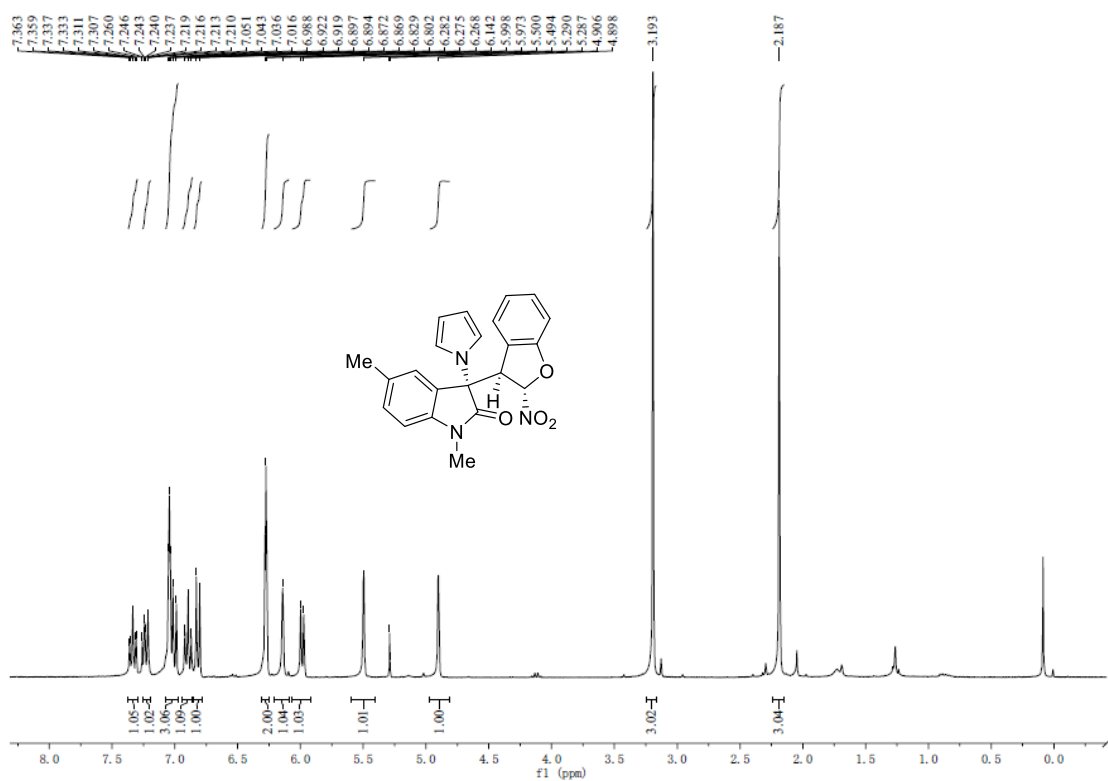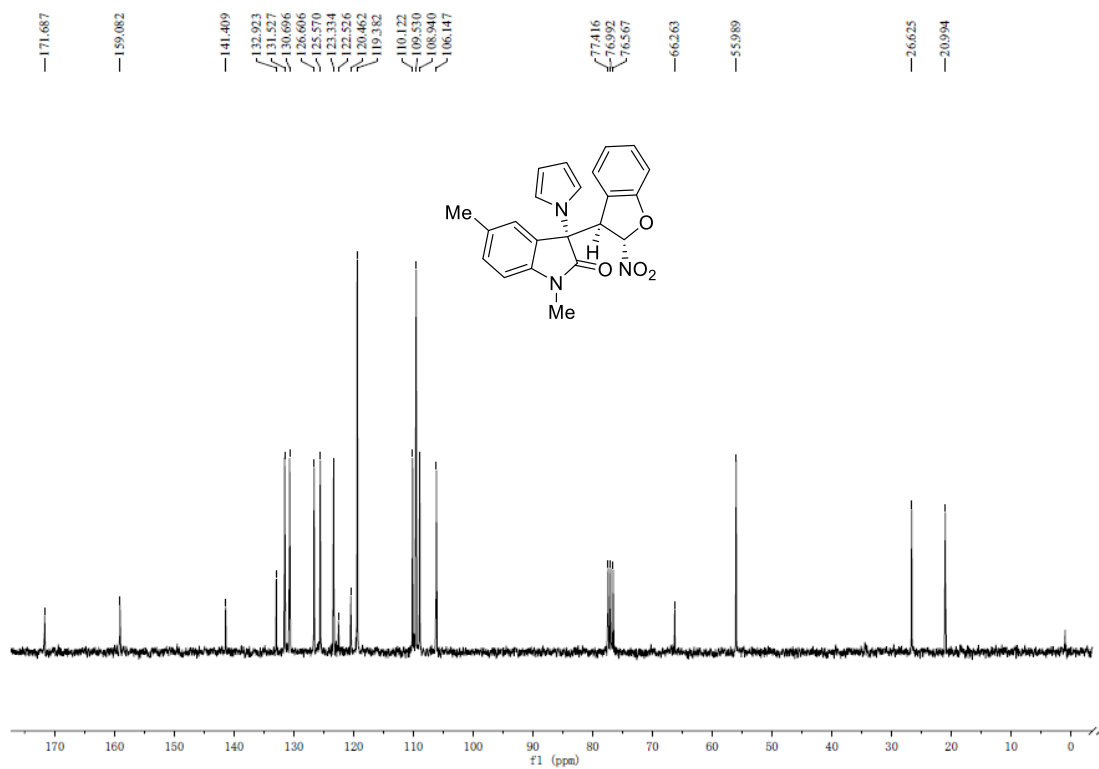



### HPLC of 3v

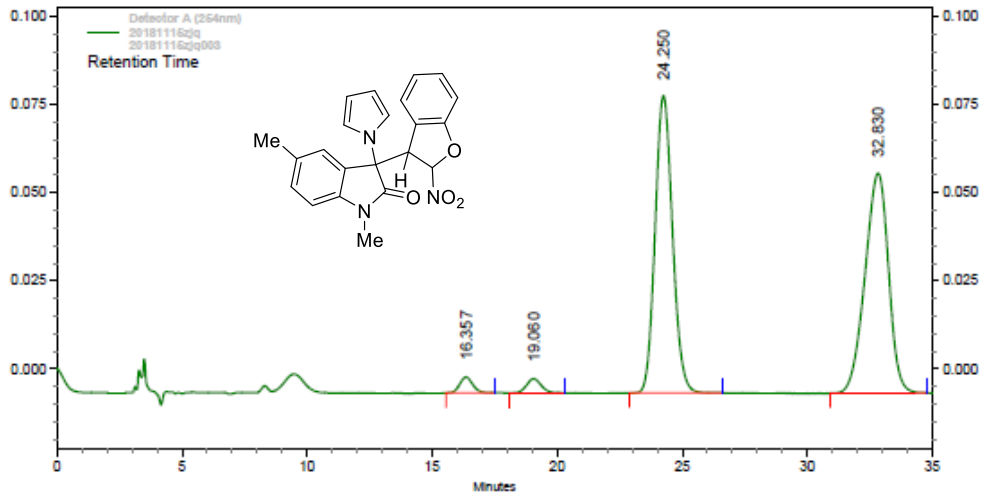

| Detector A (254nm) |                |        |                |         |              |  |
|--------------------|----------------|--------|----------------|---------|--------------|--|
| PK #               | Retention Time | Height | Height Percent | Area    | Area Percent |  |
| 1                  | 16.357         | 4475   | 2.88           | 160773  | 1.90         |  |
| 2                  | 19.060         | 4004   | 2.58           | 162441  | 1.91         |  |
| 3                  | 24.250         | 84353  | 54.34          | 4082645 | 48.13        |  |
| 4                  | 32.830         | 62405  | 40.20          | 4076913 | 48.06        |  |
| Totals             |                |        |                |         |              |  |
|                    |                | 155237 | 100.00         | 8482772 | 100.00       |  |

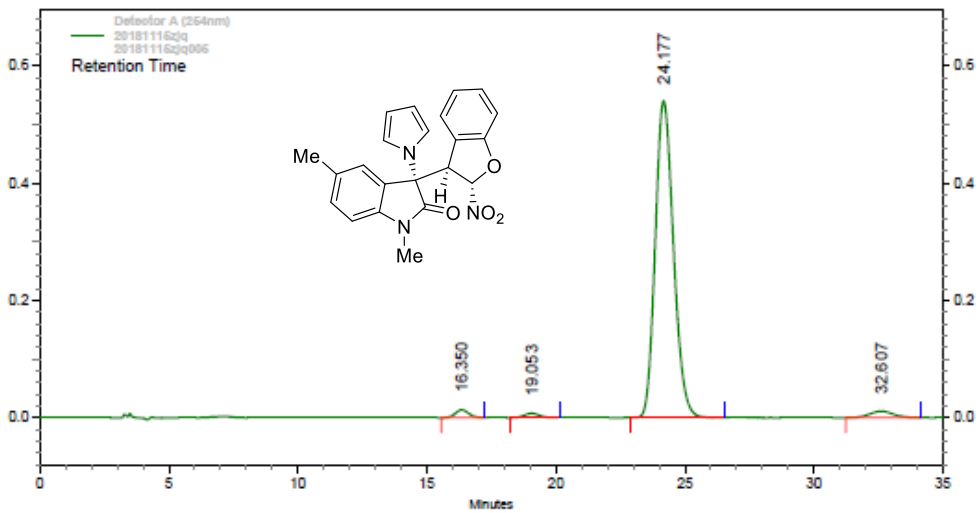

| Detector A (254nm) |                |        |                |          |              |  |
|--------------------|----------------|--------|----------------|----------|--------------|--|
| PK #               | Retention Time | Height | Height Percent | Area     | Area Percent |  |
| 1                  | 16.350         | 13321  | 2.33           | 473417   | 1.69         |  |
| 2                  | 19.053         | 7374   | 1.29           | 297306   | 1.06         |  |
| 3                  | 24.177         | 540098 | 94.49          | 26536537 | 94.79        |  |
| 4                  | 32.607         | 10804  | 1.89           | 689009   | 2.46         |  |
| Totals             |                |        |                |          |              |  |
|                    |                | 571597 | 100.00         | 27996269 | 100.00       |  |

<sup>1</sup>H and <sup>13</sup>C NMR of 5a

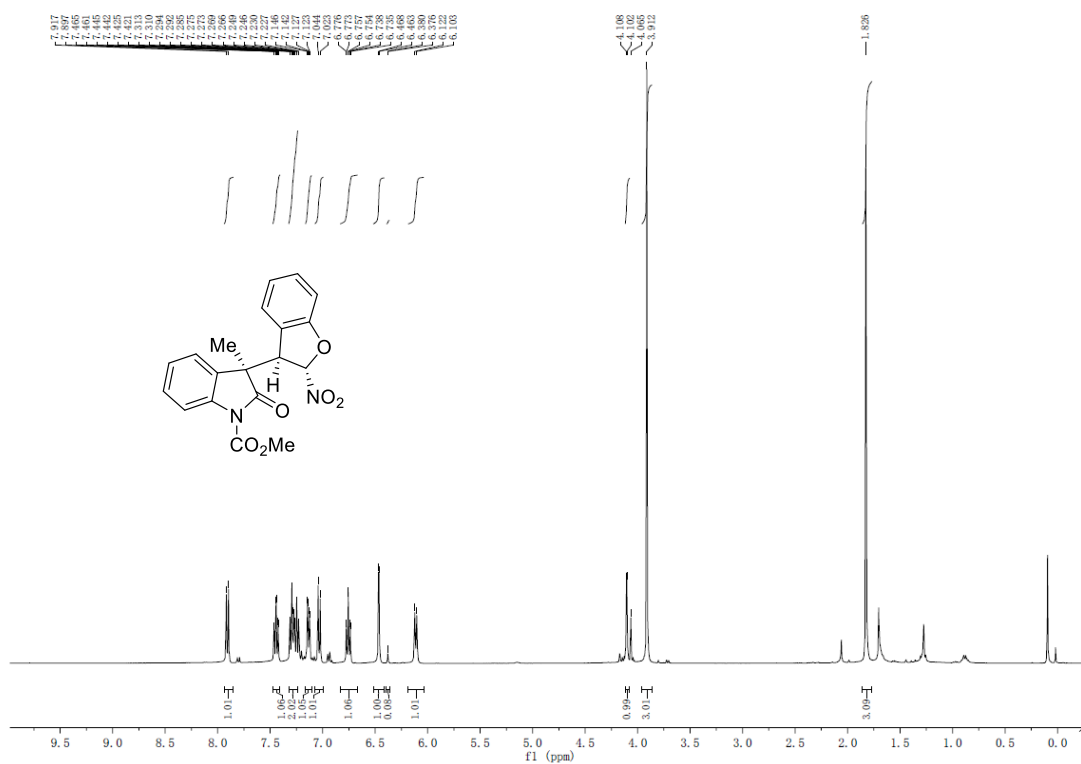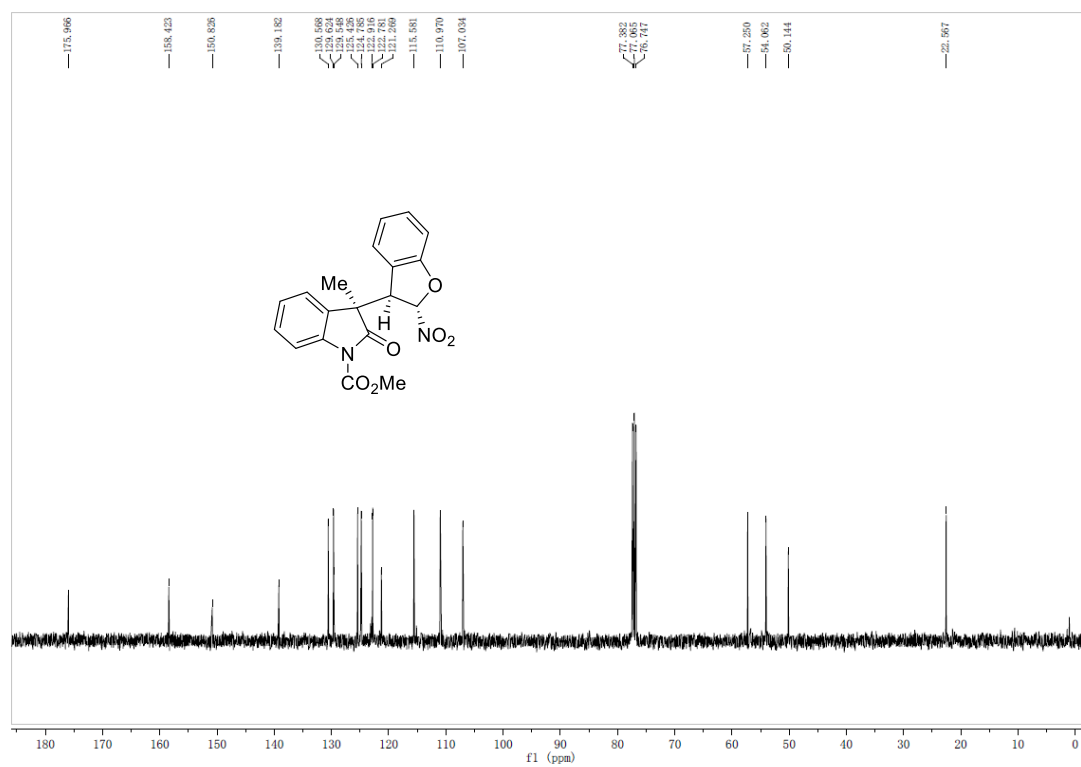

### HPLC of 5a

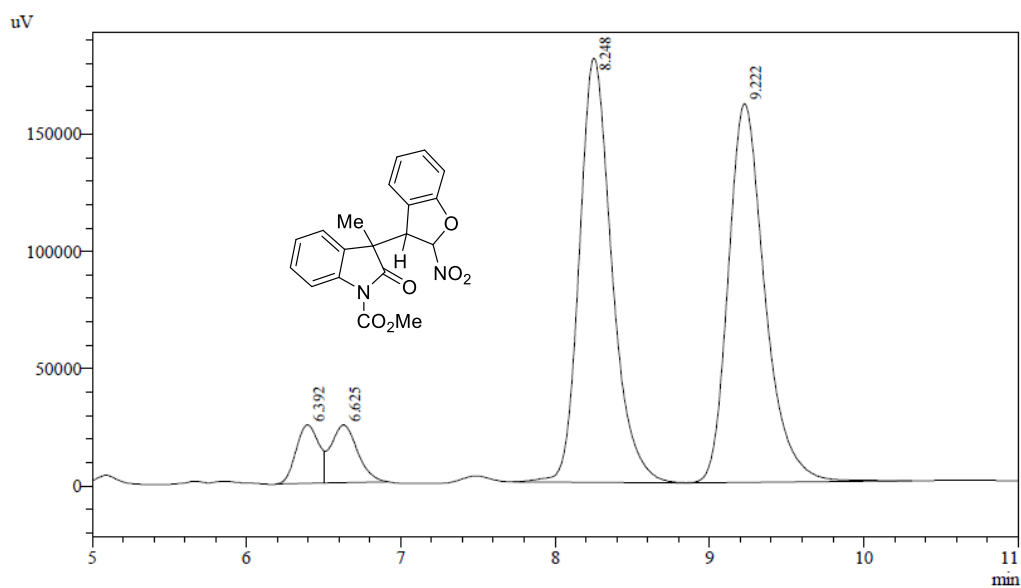

Detector A Ch1 254nm

| Peak# | Ret. Time | Area    | Height | Area %  | Height % |
|-------|-----------|---------|--------|---------|----------|
| 1     | 6.392     | 260715  | 24996  | 4.449   | 6.379    |
| 2     | 6.625     | 293307  | 24620  | 5.005   | 6.283    |
| 3     | 8.248     | 2648791 | 180871 | 45.199  | 46.157   |
| 4     | 9.222     | 2657527 | 161373 | 45.348  | 41.181   |
| Total |           | 5860339 | 391860 | 100.000 | 100.000  |

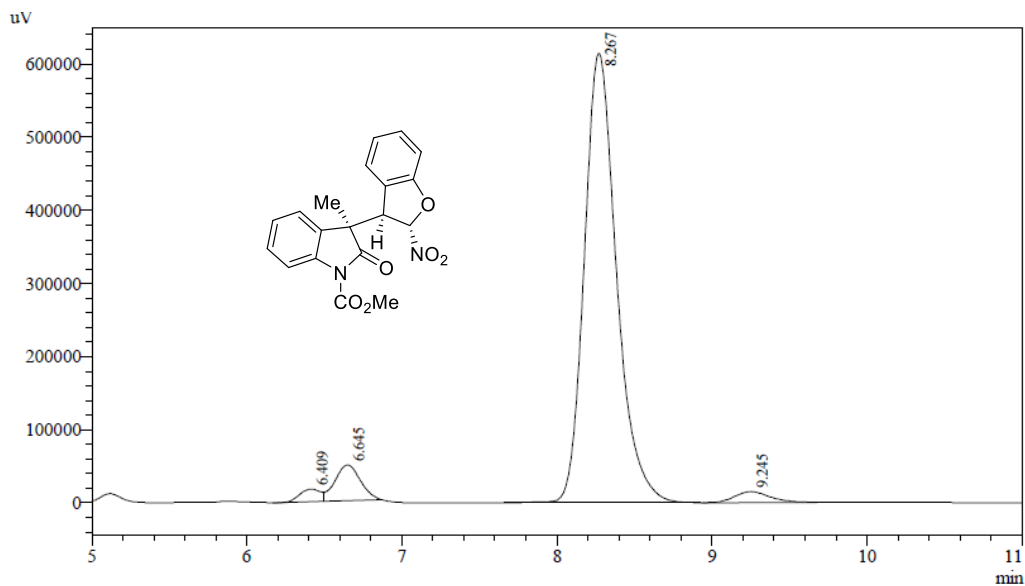

Detector A Ch1 254nm

| Peak# | Ret. Time | Area    | Height | Area %  | Height % |
|-------|-----------|---------|--------|---------|----------|
| 1     | 6.409     | 157238  | 17170  | 1.598   | 2.471    |
| 2     | 6.645     | 554549  | 48677  | 5.637   | 7.005    |
| 3     | 8.267     | 8887906 | 614115 | 90.348  | 88.371   |
| 4     | 9.245     | 237699  | 14966  | 2.416   | 2.154    |
| Total |           | 9837392 | 694928 | 100.000 | 100.000  |



### HPLC of 5b

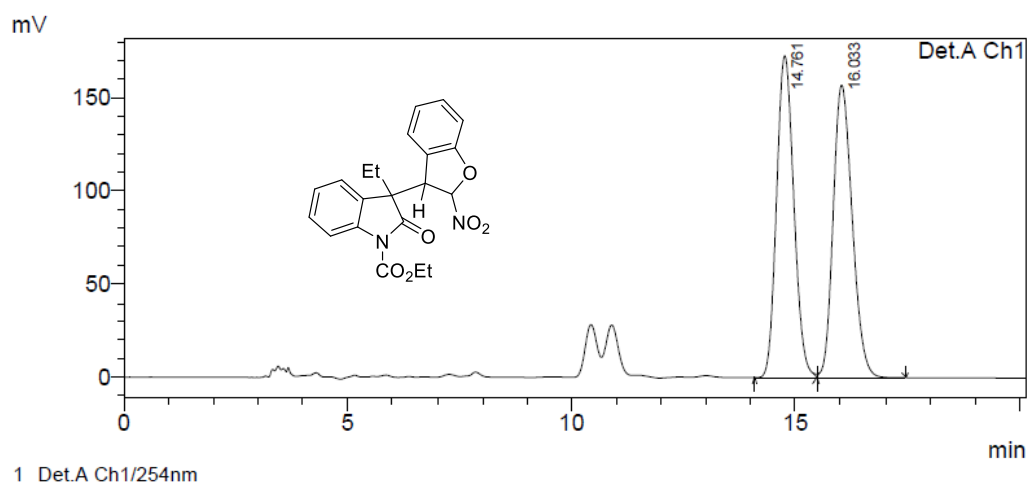

PeakTable

Detector A Ch1 254nm

| Peak# | Ret. Time | Area    | Height | Area %  |
|-------|-----------|---------|--------|---------|
| 1     | 14.761    | 4649797 | 172968 | 49.909  |
| 2     | 16.033    | 4666710 | 157077 | 50.091  |
| Total |           | 9316507 |        | 100.000 |

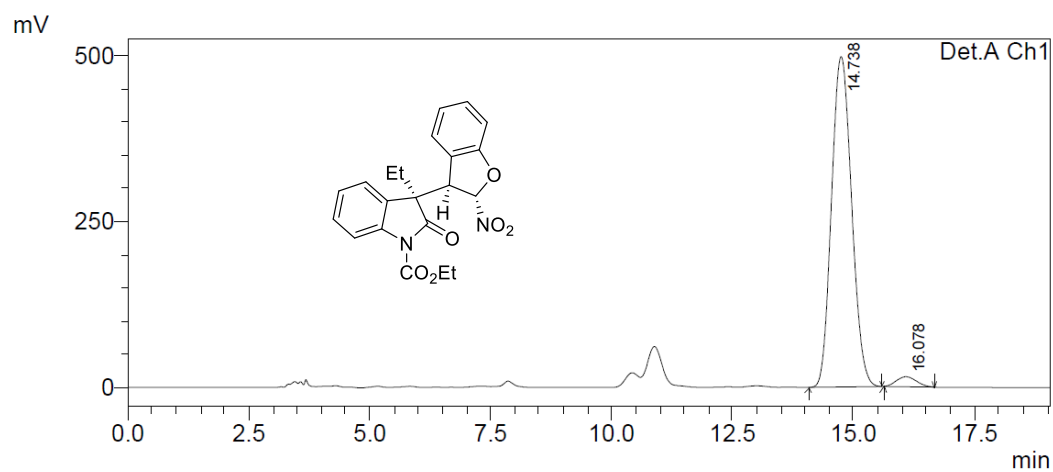

PeakTable

Detector A Ch1 254nm

| Peak# | Ret. Time | Area     | Height | Area %  |
|-------|-----------|----------|--------|---------|
| 1     | 14.738    | 14422183 | 498098 | 97.074  |
| 2     | 16.078    | 434643   | 15095  | 2.926   |
| Total |           | 14856826 |        | 100.000 |

# $^1\text{H}$ and $^{13}\text{C}$ NMR of **5c**

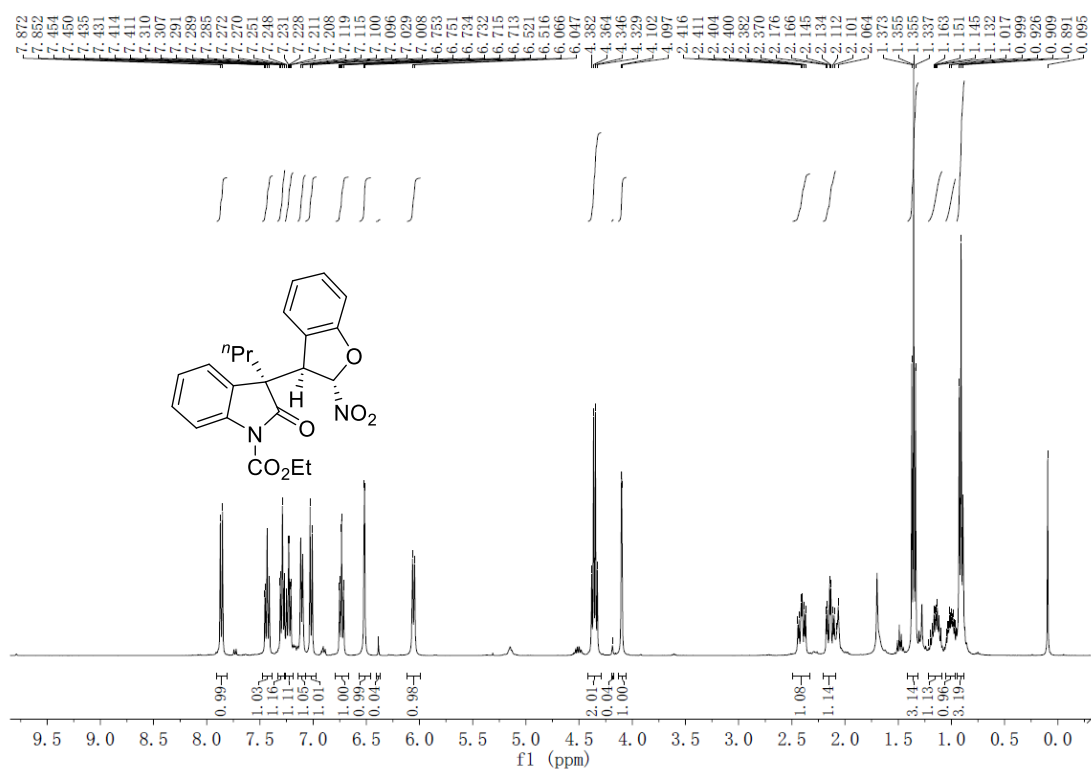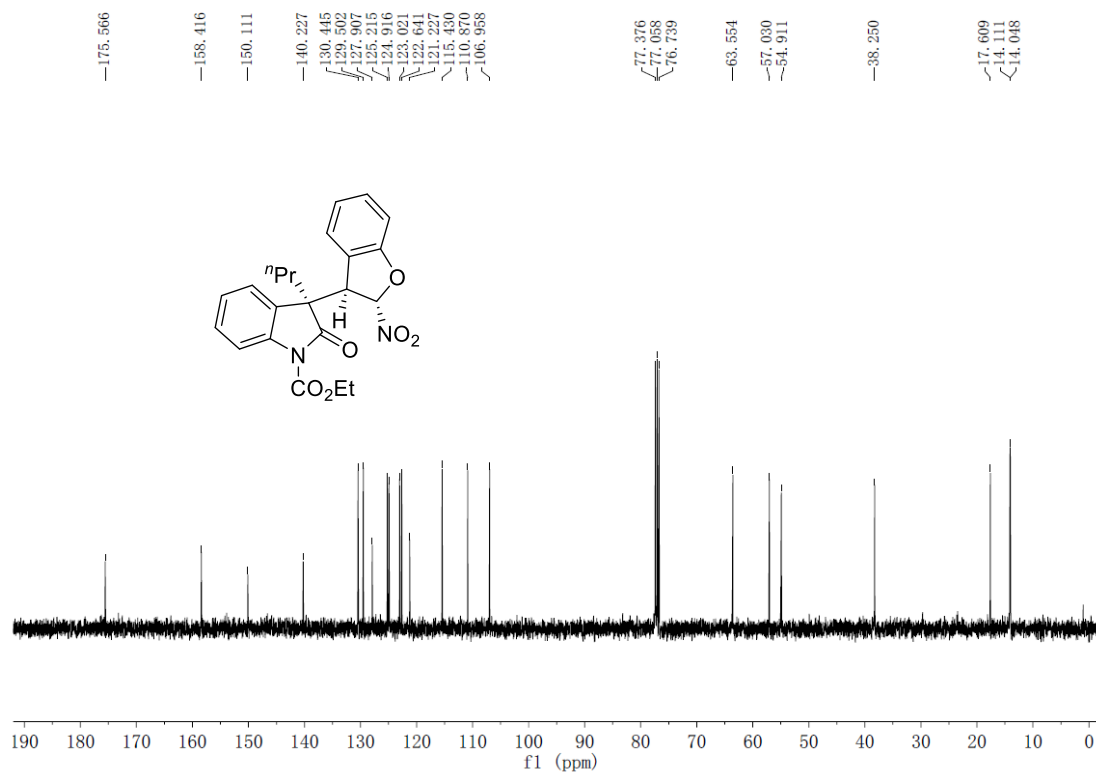

### HPLC of 5c

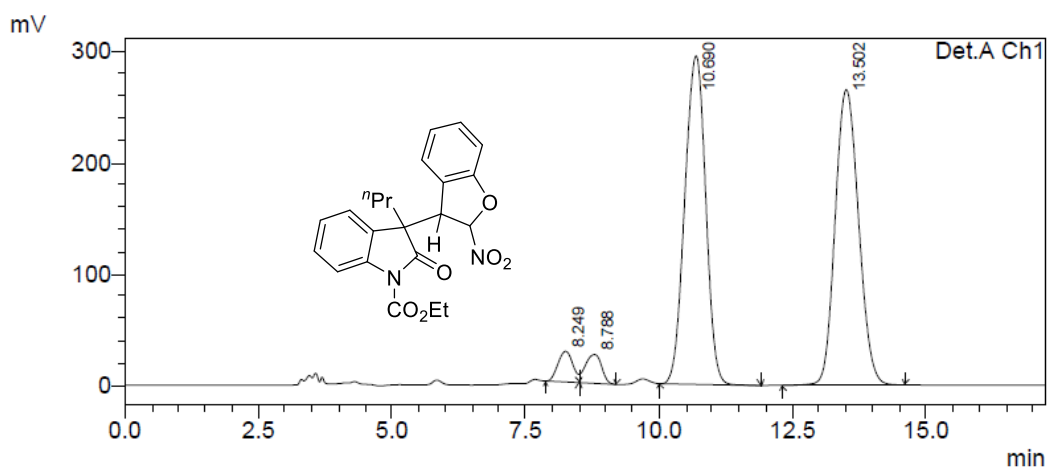

PeakTable

Detector A Ch1 254nm

| Peak# | Ret. Time | Area     | Height | Area %  |
|-------|-----------|----------|--------|---------|
| 1     | 8.249     | 535521   | 27622  | 3.109   |
| 2     | 8.788     | 553175   | 25930  | 3.211   |
| 3     | 10.690    | 8051627  | 295211 | 46.740  |
| 4     | 13.502    | 8086125  | 265367 | 46.940  |
| Total |           | 17226449 |        | 100.000 |

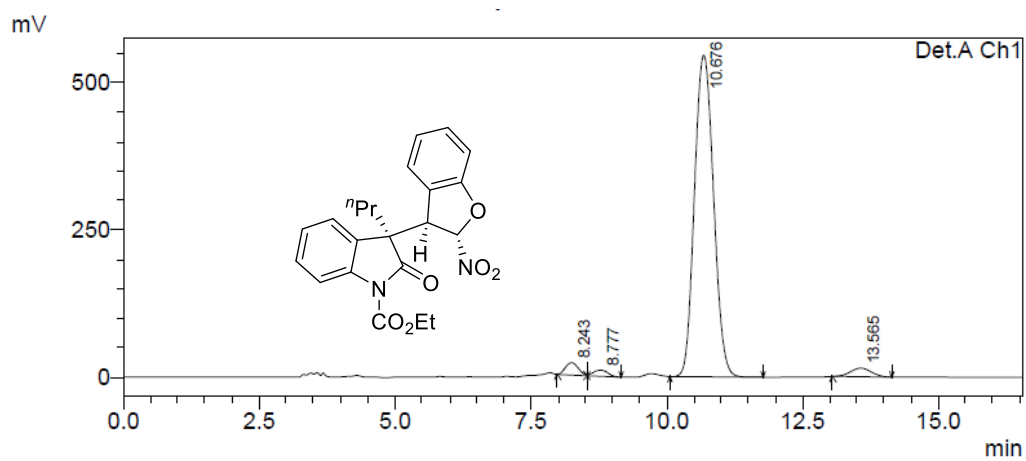

PeakTable

Detector A Ch1 254nm

| Peak# | Ret. Time | Area     | Height | Area %  |
|-------|-----------|----------|--------|---------|
| 1     | 8.243     | 346029   | 20998  | 2.423   |
| 2     | 8.777     | 188230   | 10196  | 1.318   |
| 3     | 10.676    | 13354315 | 545847 | 93.524  |
| 4     | 13.565    | 390483   | 14520  | 2.735   |
| Total |           | 14279057 |        | 100.000 |

# <sup>1</sup>H and <sup>13</sup>C NMR of 5d

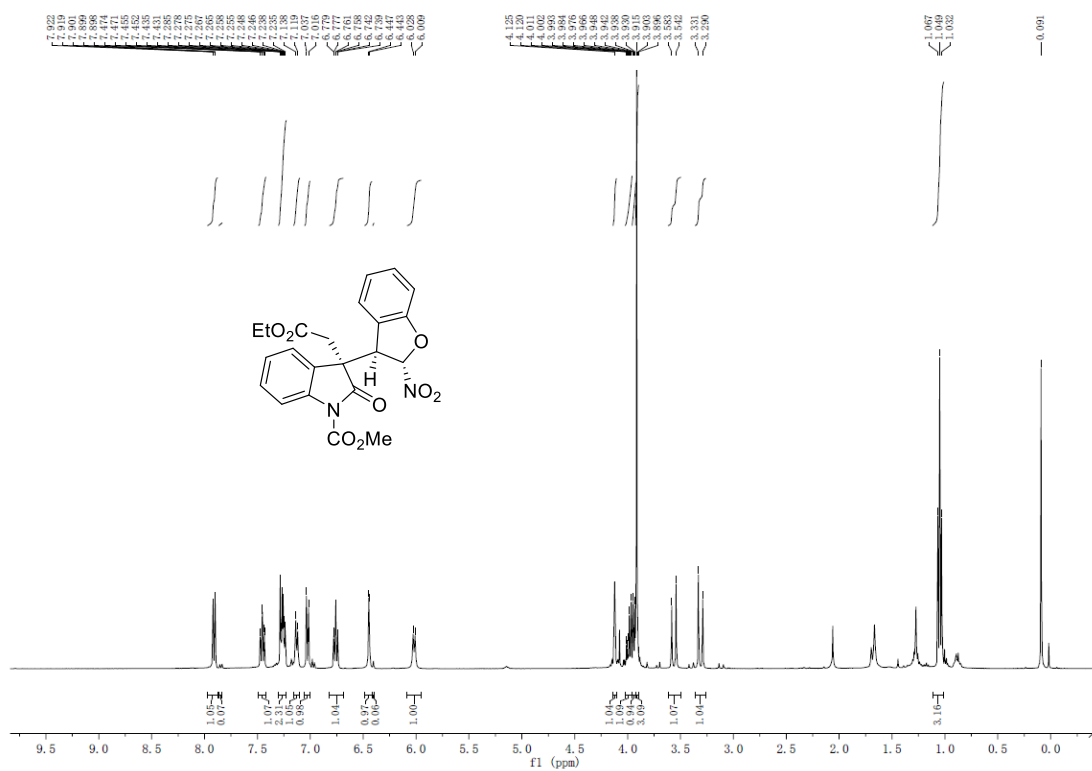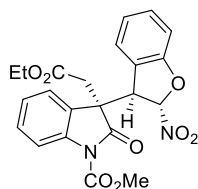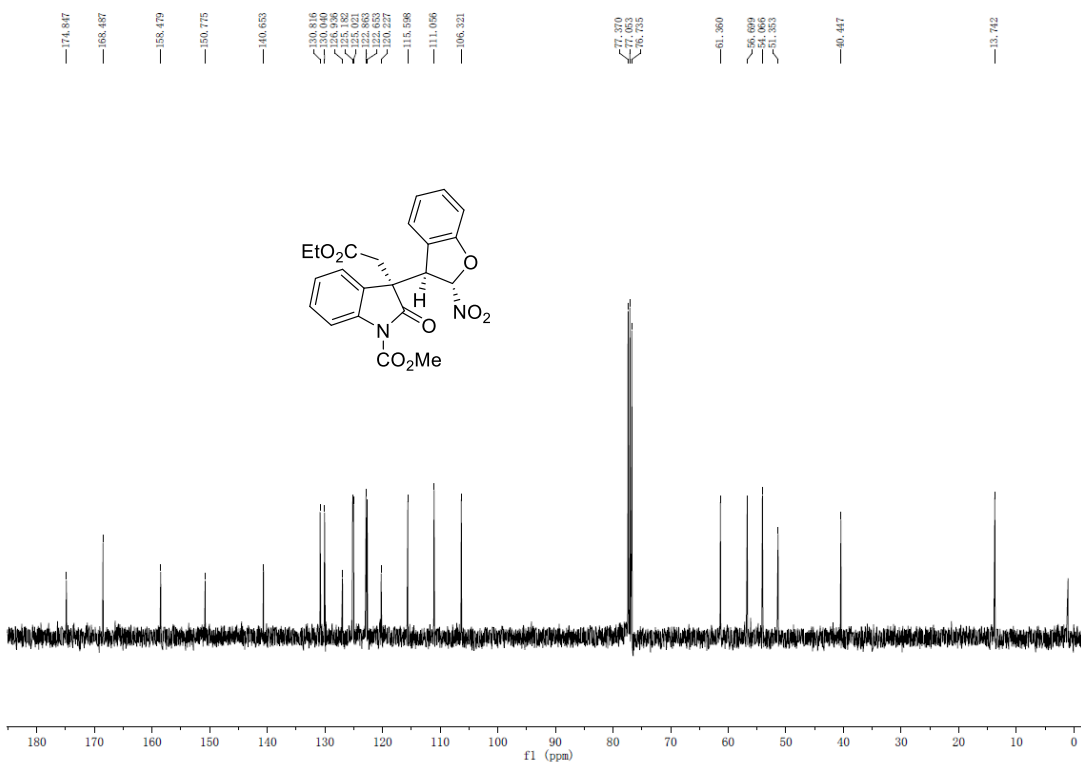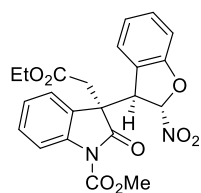



### HPLC of 5d

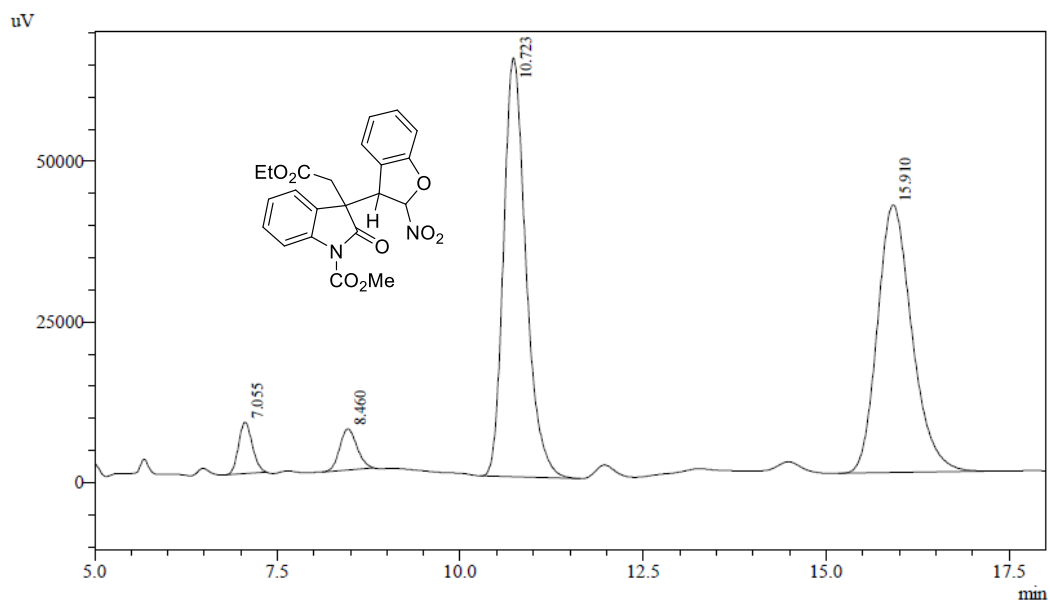

Detector A Ch1 254nm

| Peak# | Ret. Time | Area    | Height | Area %  | Height % |
|-------|-----------|---------|--------|---------|----------|
| 1     | 7.055     | 105199  | 7997   | 3.544   | 6.593    |
| 2     | 8.460     | 104583  | 6393   | 3.523   | 5.270    |
| 3     | 10.723    | 1385839 | 65217  | 46.684  | 53.763   |
| 4     | 15.910    | 1372943 | 41698  | 46.249  | 34.374   |
| Total |           | 2968564 | 121304 | 100.000 | 100.000  |

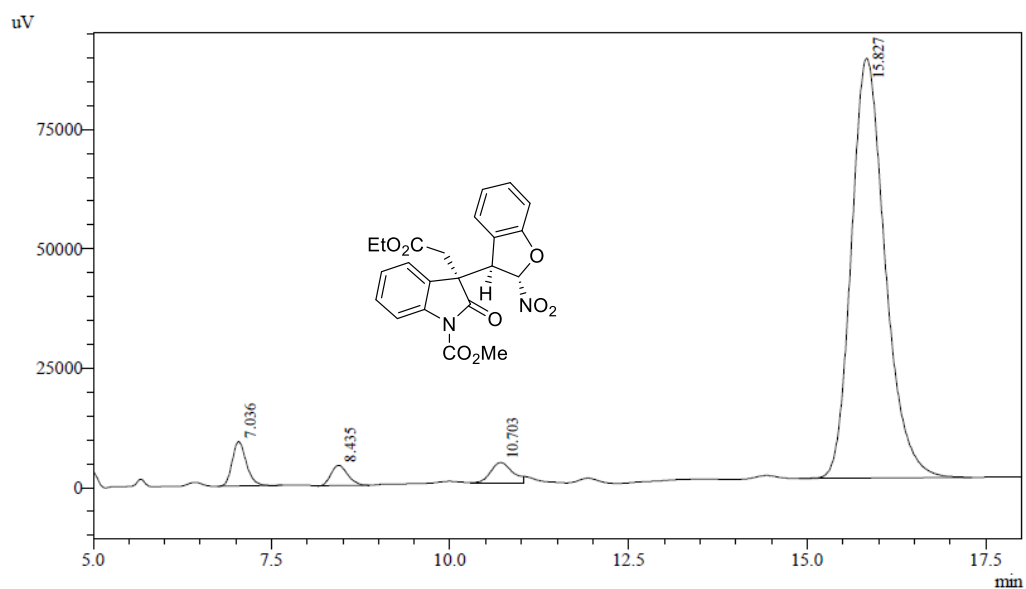

Detector A Ch1 254nm

| Peak# | Ret. Time | Area    | Height | Area %  | Height % |
|-------|-----------|---------|--------|---------|----------|
| 1     | 7.036     | 127842  | 9302   | 4.028   | 8.802    |
| 2     | 8.435     | 68476   | 4251   | 2.157   | 4.023    |
| 3     | 10.703    | 89068   | 4214   | 2.806   | 3.988    |
| 4     | 15.827    | 2888582 | 87914  | 91.009  | 83.188   |
| Total |           | 3173968 | 105682 | 100.000 | 100.000  |

# <sup>1</sup>H and <sup>13</sup>C NMR of 5e

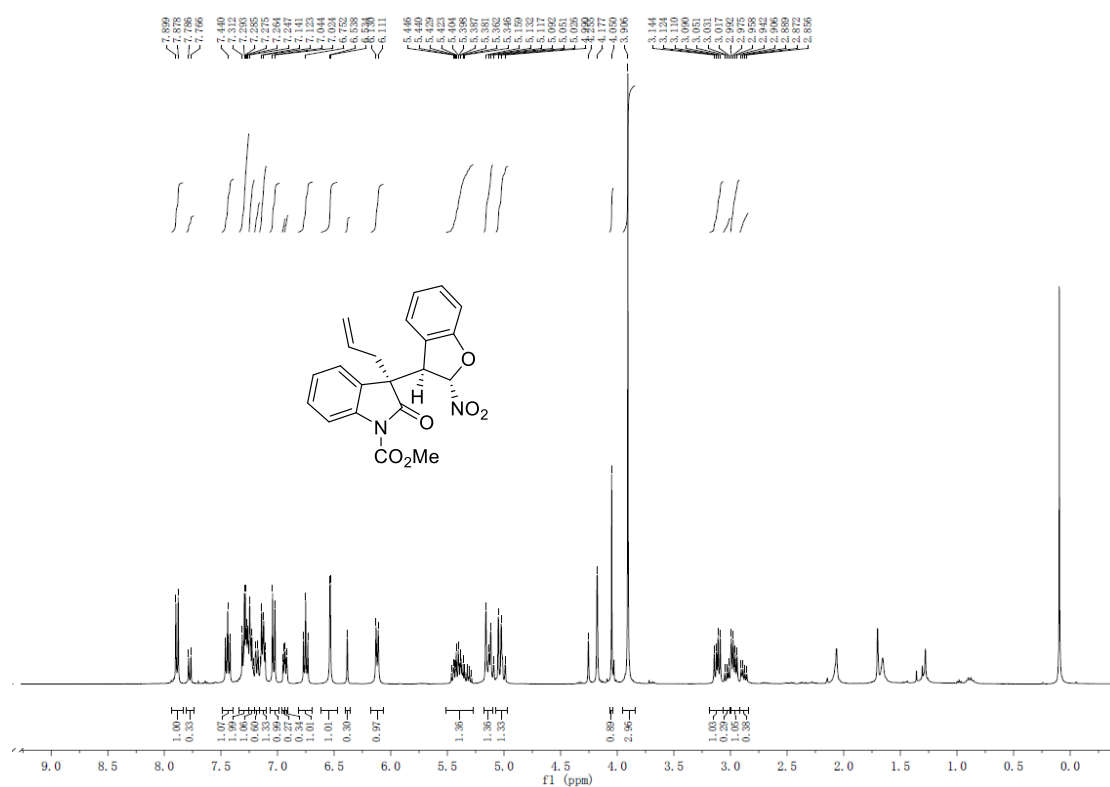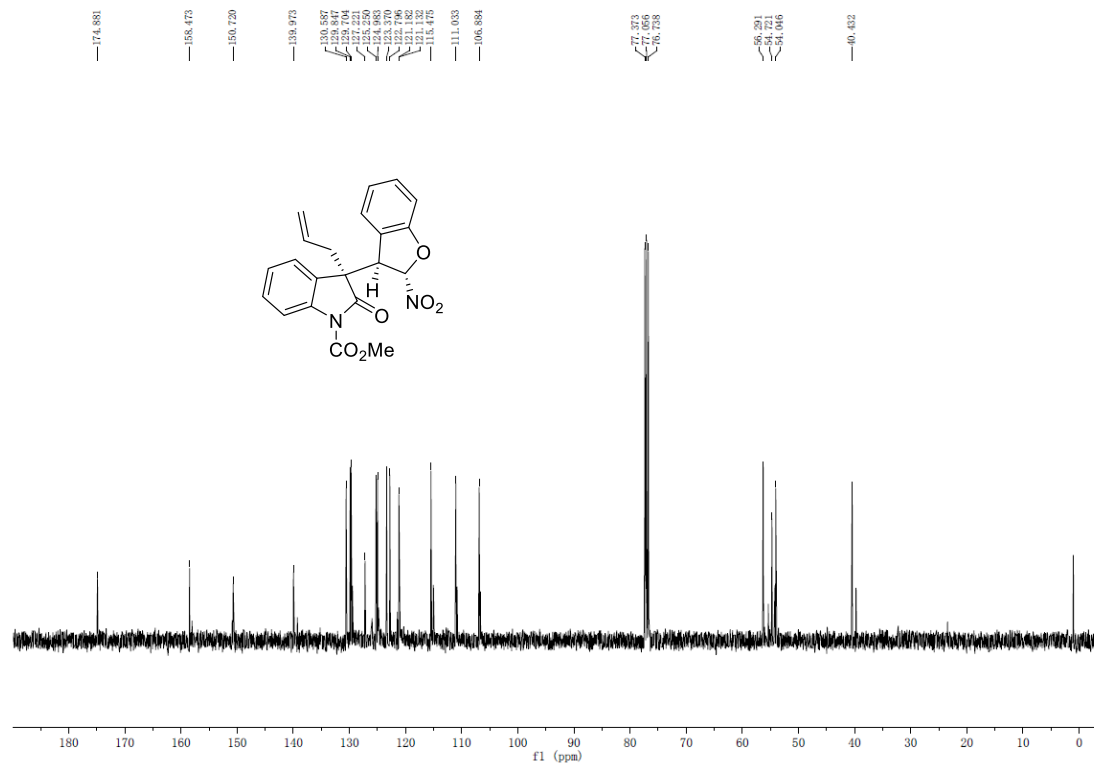

### HPLC of 5e

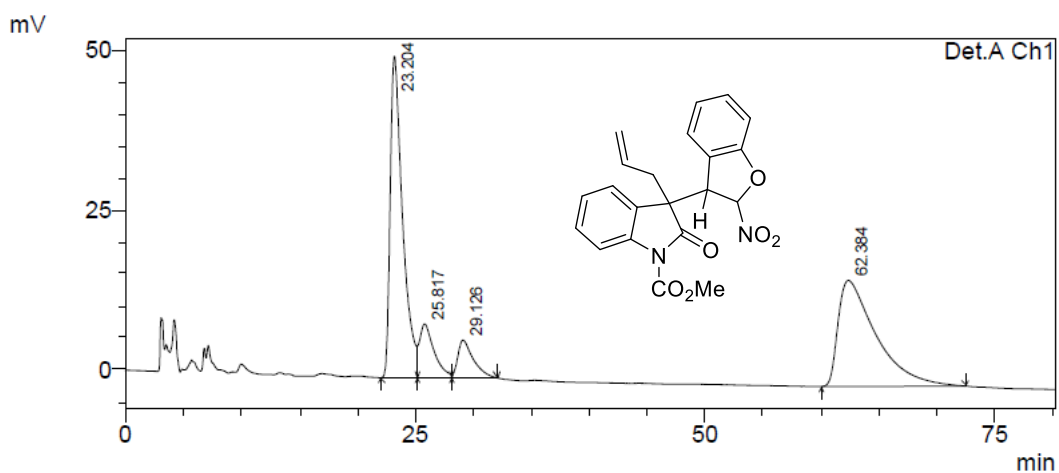

PeakTable

| Detector A Ch1 254nm |           |         |        |         |
|----------------------|-----------|---------|--------|---------|
| Peak#                | Ret. Time | Area    | Height | Area %  |
| 1                    | 23.204    | 3718546 | 50052  | 42.410  |
| 2                    | 25.817    | 739130  | 8375   | 8.430   |
| 3                    | 29.126    | 546885  | 5859   | 6.237   |
| 4                    | 62.384    | 3763460 | 16515  | 42.923  |
| Total                |           | 8768022 |        | 100.000 |

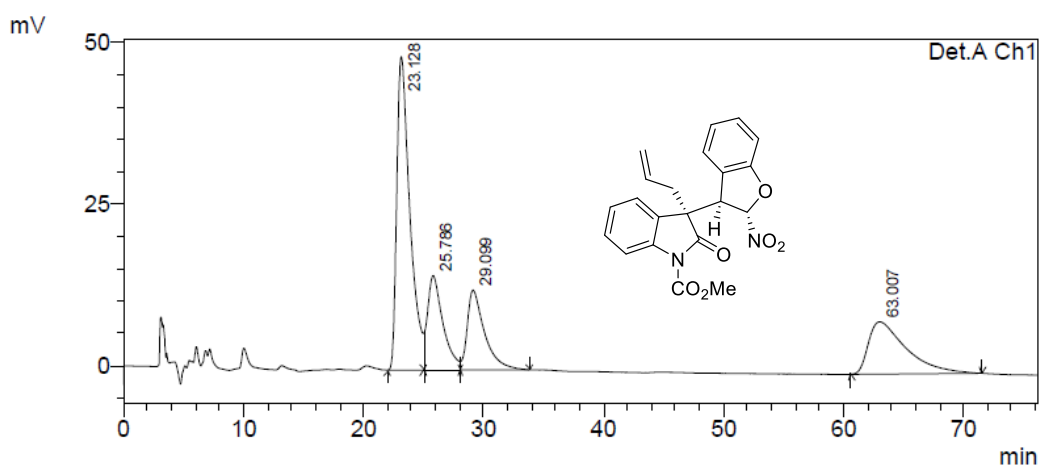

PeakTable

| Detector A Ch1 254nm |           |         |        |         |
|----------------------|-----------|---------|--------|---------|
| Peak#                | Ret. Time | Area    | Height | Area %  |
| 1                    | 23.128    | 3664641 | 48459  | 45.753  |
| 2                    | 25.786    | 1328417 | 14588  | 16.585  |
| 3                    | 29.099    | 1238017 | 12330  | 15.457  |
| 4                    | 63.007    | 1778488 | 8094   | 22.205  |
| Total                |           | 8009564 |        | 100.000 |

# <sup>1</sup>H and <sup>13</sup>C NMR of 5f

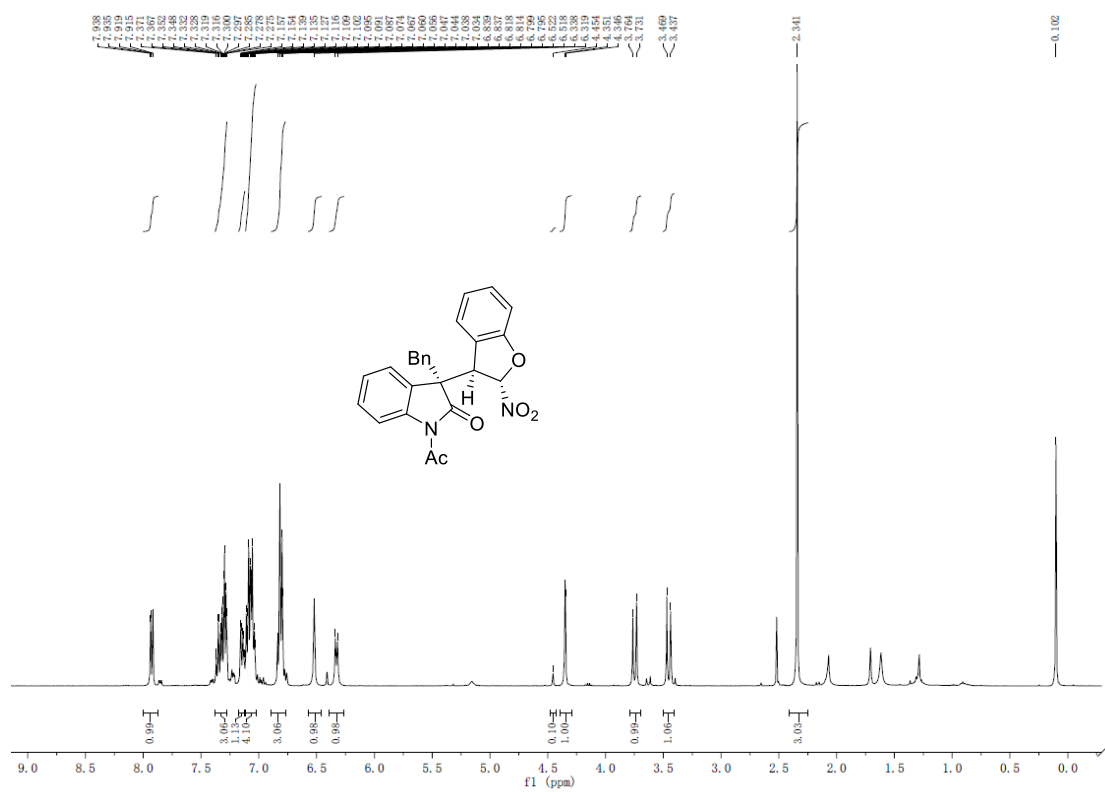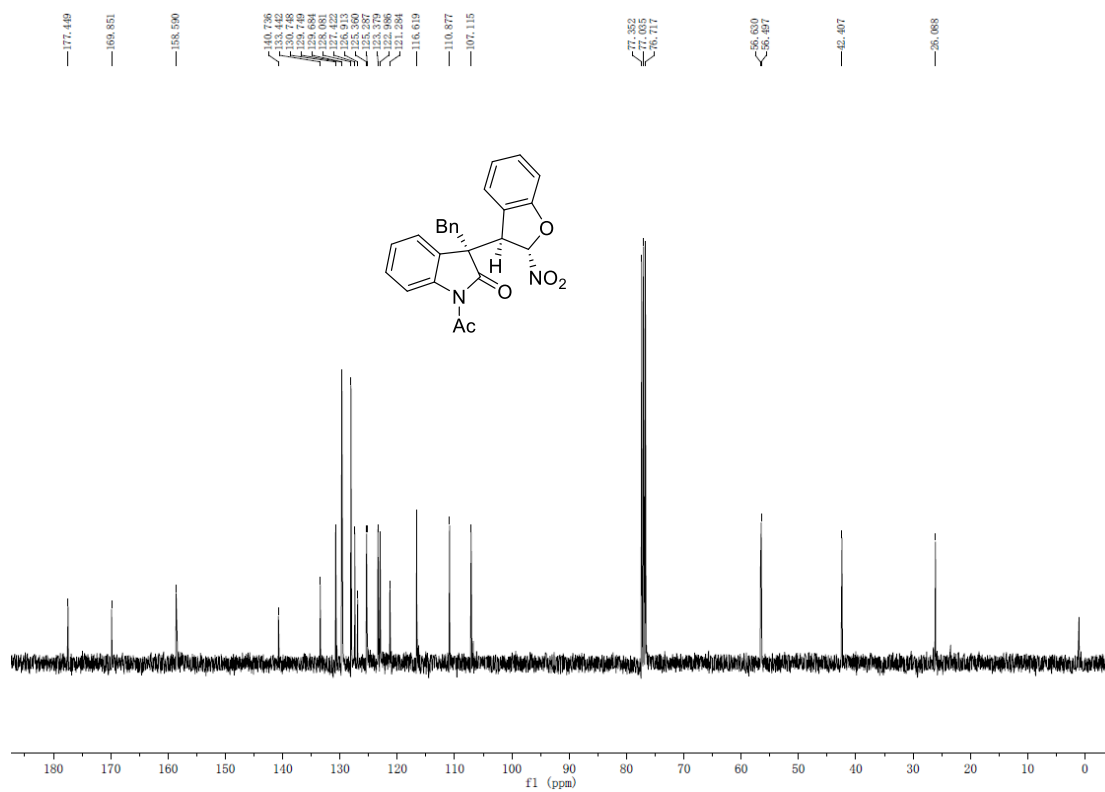

### HPLC of 5f

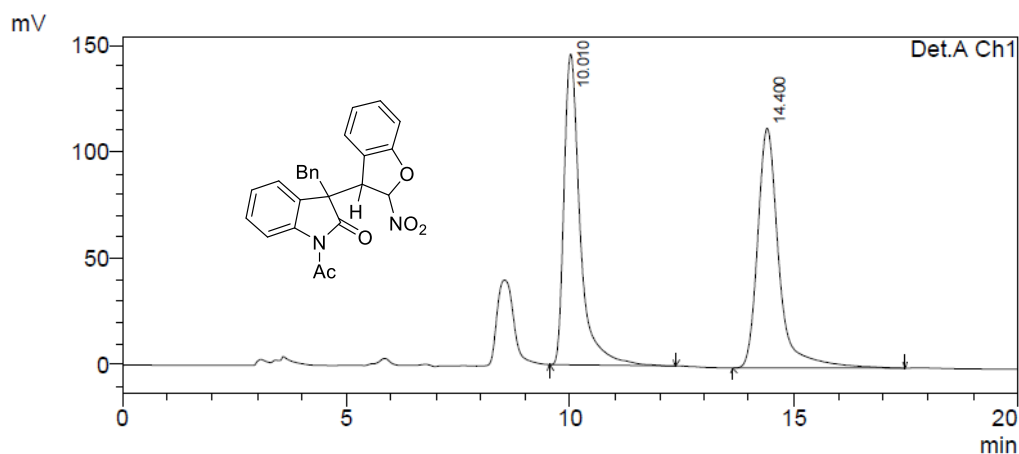

PeakTable

Detector A Ch1 254nm

| Peak# | Ret. Time | Area    | Height | Area %  |
|-------|-----------|---------|--------|---------|
| 1     | 10.010    | 3659829 | 145910 | 49.616  |
| 2     | 14.400    | 3716482 | 112451 | 50.384  |
| Total |           | 7376311 |        | 100.000 |

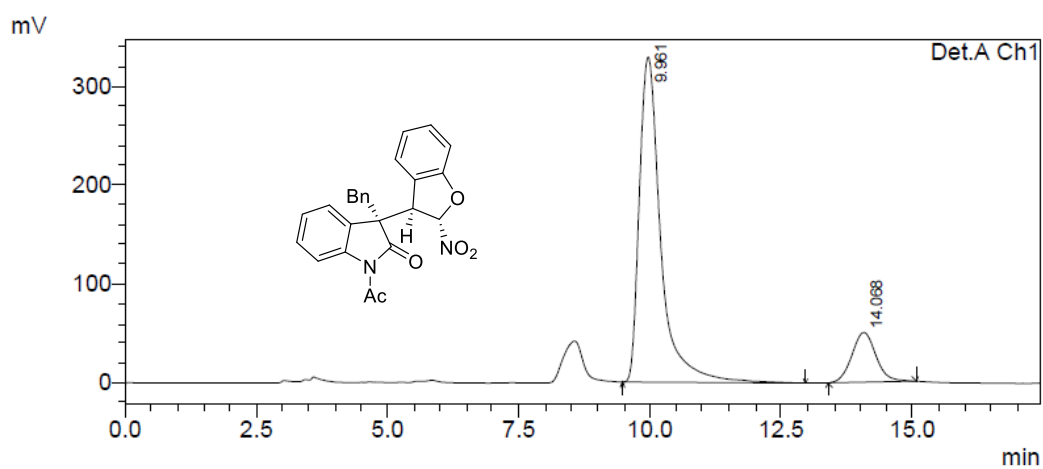

PeakTable

Detector A Ch1 254nm

| Peak# | Ret. Time | Area     | Height | Area %  |
|-------|-----------|----------|--------|---------|
| 1     | 9.961     | 9354308  | 328945 | 85.298  |
| 2     | 14.068    | 1612293  | 50295  | 14.702  |
| Total |           | 10966602 |        | 100.000 |



### HPLC of 5g

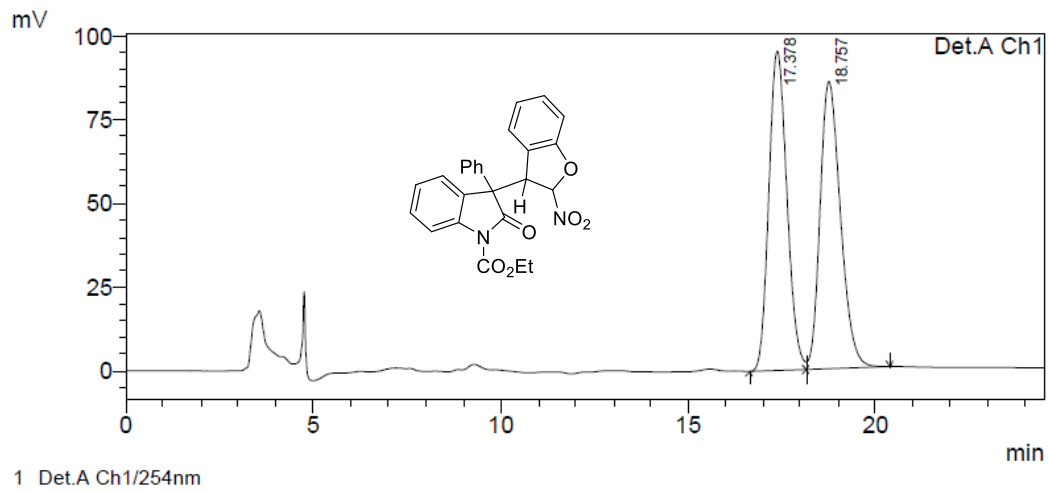

PeakTable

| Peak# | Ret. Time | Area    | Height | Area %  |
|-------|-----------|---------|--------|---------|
| 1     | 17.378    | 3206948 | 95401  | 49.625  |
| 2     | 18.757    | 3255448 | 85804  | 50.375  |
| Total |           | 6462397 |        | 100.000 |

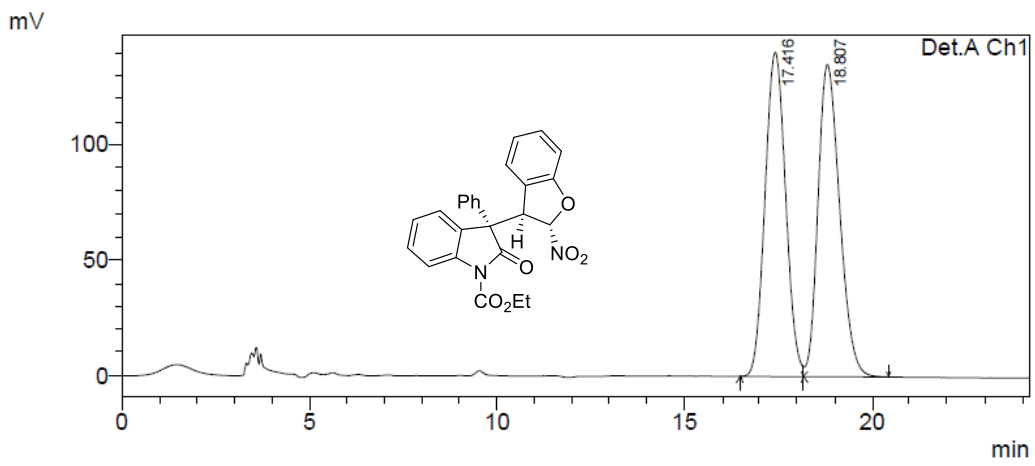

PeakTable

| Peak# | Ret. Time | Area     | Height | Area %  |
|-------|-----------|----------|--------|---------|
| 1     | 17.416    | 5362148  | 140368 | 49.740  |
| 2     | 18.807    | 5418267  | 135087 | 50.260  |
| Total |           | 10780415 |        | 100.000 |
